# Supplementary material for: The mechanism for N2 activation in the E4 – state of nitrogenase
Source: Royal Society of Chemistry journal article supplement (doi:10.1039/d3cp02851h), 2023-01-01
Supplement: d3cp02851h1.pdf [file d3cp02851h1.pdf]

## Supporting information:

### The mechanism for N<sub>2</sub> activation in the E<sub>4</sub>-state of nitrogenase.

Per E. M. Siegbahn\*

Department of Organic Chemistry, Arrhenius Laboratory, Stockholm University,  
SE-106 91, Stockholm, Sweden. Email:per.siegbahn@su.se

The starting E<sub>4</sub> structure with two hydrides in **Figure 1 and 2**. # means fixed atom  
Energies: E= -7921.479734, solv = -0.202761, disp = -230.64 Z<sub>0</sub> = 894.84

|     |                |                |                |
|-----|----------------|----------------|----------------|
| Mo1 | 16.3411878090  | -5.8843224691  | 53.3532482045  |
| Fe2 | 9.8545237449   | -8.7066672616  | 55.8026803599  |
| Fe3 | 11.1270830736  | -6.1567857625  | 55.2253963209  |
| Fe4 | 11.2975412550  | -7.8791910044  | 53.1939275092  |
| Fe5 | 12.4004711229  | -8.7721346694  | 55.7826411927  |
| Fe6 | 14.5828727439  | -8.0468881788  | 54.3097782500  |
| Fe7 | 13.9710400141  | -5.7325498335  | 55.4475370195  |
| Fe8 | 13.2849575036  | -6.0681983570  | 52.9644078942  |
| C9  | 17.6826441859  | -2.2589053299  | 54.3195294106  |
| H10 | 17.8384919968  | -1.2545925665  | 53.9210344378  |
| H11 | 16.6046985230  | -2.3860228098  | 54.4827461332  |
| C12 | 18.1490916089  | -3.3294888351  | 53.3066023869  |
| C13 | 19.6205941297  | -3.0741902320  | 52.9009842022  |
| H14 | 20.2451659748  | -3.1818351138  | 53.7935819454  |
| H15 | 19.6926868002  | -2.0373160710  | 52.5549727621  |
| C16 | 20.1256658531  | -4.0148389529  | 51.7871779042  |
| H17 | 19.6151226762  | -3.8053958370  | 50.8451575598  |
| H18 | 19.9209928568  | -5.0510016584  | 52.0769603817  |
| C19 | 17.3109458328  | -3.4189019885  | 51.9976756549  |
| O20 | 16.8868131451  | -4.6179283585  | 51.7026256488  |
| O21 | 17.1890581818  | -2.4195844689  | 51.2905840319  |
| O22 | 18.0371388030  | -4.6068516786  | 53.9600244506  |
| C23 | 12.6703429290  | -7.2370369276  | 54.4920100332  |
| S24 | 12.3157255346  | -4.6567520170  | 56.8687276896  |
| S25 | 16.0758574362  | -6.7283949943  | 55.6923376397  |
| S26 | 9.4625045707   | -4.9381587745  | 53.9288238078  |
| S28 | 14.4626583560  | -10.1118021486 | 55.6799683710  |
| S29 | 14.4754472099  | -4.1580799740  | 53.6650878874  |
| S30 | 10.0380570449  | -9.7078565374  | 53.6279410778  |
| S31 | 15.0144651125  | -7.5224654096  | 52.0632631740  |
| S32 | 11.6130691052  | -6.5318388603  | 51.1209386392  |
| H33 | 13.6351742031# | -2.1902105282# | 49.0425559854# |
| C34 | 13.2979245689# | -2.0241172350# | 50.0550231810# |
| H35 | 13.9034573660  | -2.6598888494  | 50.7056694277  |
| H36 | 13.4458796854  | -0.9759837742  | 50.3384609648  |
| N37 | 11.8837648438  | -2.4084978367  | 50.1233956643  |
| H38 | 11.2953624729  | -2.0817310269  | 49.3700215198  |
| C39 | 11.2184954364  | -2.8361532489  | 51.2147486715  |
| N40 | 11.7993980766  | -3.0468706509  | 52.3782661061  |
| H41 | 11.2465556981  | -3.5295639622  | 53.1004721498  |
| H42 | 12.8174814132  | -3.1088642410  | 52.5167372597  |
| N43 | 9.8636686496   | -2.9870417022  | 51.1220582283  |
| H44 | 9.5059159338   | -3.2738784432  | 50.2198237743  |
| H45 | 9.4353741924   | -3.4837118621  | 51.9147680080  |
| H46 | 7.9311775757   | 0.3969127240   | 59.4142474362  |
| C47 | 8.3601754768   | -1.3536927130  | 60.6733970028  |
| H48 | 8.2198839164   | -1.5872878048  | 61.7357893086  |
| H49 | 7.5979341439   | -1.9169598563  | 60.1227019719  |
| C50 | 9.7342740982   | -1.8208202775  | 60.2990237029  |
| N51 | 10.7434350030  | -1.8645251239  | 61.2445204061  |

|      |                |                 |                |
|------|----------------|-----------------|----------------|
| C52  | 10.2173002769  | -2.2368975484   | 59.0790733622  |
| H53  | 9.7528195690   | -2.3761937290   | 58.1160708509  |
| C54  | 11.8067447778  | -2.3077230738   | 60.5997409865  |
| H55  | 12.7794232071  | -2.4938842201   | 61.0333020138  |
| N56  | 11.5445812744  | -2.5368910735   | 59.2853935335  |
| H57  | 19.2247459747  | -4.4001181294   | 57.4827423718  |
| H58  | 16.7207626868  | -8.8606035832   | 50.7823707470  |
| C59  | 18.3600442894  | -7.4209545971   | 50.6554863816  |
| H60  | 17.7203439277  | -6.5342444729   | 50.6265155384  |
| H61  | 19.1973292499  | -7.2324642976   | 49.9691587286  |
| C62  | 18.9076235659  | -7.5720035941   | 52.0408482857  |
| N63  | 18.1761048537  | -7.2359640103   | 53.1707608275  |
| C64  | 20.1357264525  | -8.0388899954   | 52.4430320023  |
| H65  | 20.9854226467  | -8.3939914895   | 51.8805623874  |
| C66  | 18.9398448911  | -7.4917565622   | 54.2223093263  |
| H67  | 18.6892631800  | -7.2983533025   | 55.2536852542  |
| N68  | 20.1310839156  | -7.9892042367   | 53.8265468999  |
| H69  | 20.8990905948  | -8.1757620497   | 54.4545171469  |
| H70  | 6.9632433529   | -10.5490125668  | 56.9226286093  |
| C71  | 6.1750521330#  | -9.8249632781#  | 56.6900008432# |
| H72  | 5.5309558047#  | -10.2322288176# | 56.0424860987# |
| H73  | 5.6932327346#  | -9.5371417035#  | 57.6127207581# |
| S74  | 8.1208576459   | -7.9022504903   | 57.1032182752  |
| H75  | 12.1562091462  | -2.9523415094   | 58.5858874360  |
| H76  | 18.2516973875  | -4.4020611156   | 54.9525044855  |
| C78  | 18.3652903901  | -2.3659105397   | 55.7119717248  |
| O79  | 18.6559616188  | -3.5646337195   | 56.1110449935  |
| O80  | 18.5502542807  | -1.3253137664   | 56.3655395988  |
| C81  | 21.6036263071  | -3.8760164504   | 51.5491089153  |
| O82  | 22.1579211357  | -3.4773493276   | 50.5434515634  |
| O83  | 22.3208176811# | -4.2658020416#  | 52.6398596358# |
| H84  | 15.7024656862# | -0.1996317006#  | 61.4912312798# |
| C85  | 14.8549934097# | -0.0829911871#  | 60.8320021209# |
| H86  | 13.9165015895# | -0.2867338793#  | 61.3260937710# |
| H87  | 14.8279483830  | 0.9915817637    | 60.5848765406  |
| C88  | 15.0599857654# | -0.8751944034#  | 59.5441990369# |
| H89  | 14.3835077641  | -0.4989717751   | 58.7665435195  |
| H90  | 14.7960412608  | -1.9266333706   | 59.7063201181  |
| C91  | 16.5031908365  | -0.8295814611   | 59.0342498621  |
| H92  | 16.9263363375  | 0.1792276503    | 59.1532367752  |
| H93  | 16.5564164622  | -1.0382358650   | 57.9599109557  |
| C94  | 17.4223544696  | -1.8256625768   | 59.7544369704  |
| O95  | 17.0868747364  | -2.4202248520   | 60.7847792022  |
| N96  | 18.6426525153  | -1.9792378187   | 59.1743279626  |
| H97  | 19.1605083577  | -2.7954550928   | 59.4787839270  |
| H98  | 18.7530174722  | -1.7209760024   | 58.1836447215  |
| C99  | 10.6519926369# | 0.0100033143#   | 53.3460014096# |
| H100 | 11.1636988658# | 0.9592721141#   | 53.2872696758# |
| H101 | 9.5863320405#  | 0.1850132805#   | 53.3579375021# |
| H102 | 10.9190941953  | -0.5834696714   | 52.4698598363  |
| C103 | 11.0702392862  | -0.6567050972   | 54.6716574163  |
| H104 | 10.7268855377  | -1.6990700515   | 54.6626107529  |
| C105 | 10.3874199892  | 0.0520433737    | 55.8508273284  |
| H106 | 9.2941105711   | -0.0085625901   | 55.7743167664  |
| H107 | 10.6617587762  | 1.1164166532    | 55.8783296763  |
| H108 | 10.6800093892  | -0.3902336710   | 56.8090000043  |
| C109 | 12.5945539536  | -0.6513049755   | 54.8507560345  |
| H110 | 13.1103480538  | -1.1313470011   | 54.0130682885  |
| H111 | 12.8894572896  | -1.1896090156   | 55.7581333620  |
| H112 | 12.9697410042  | 0.3790919023    | 54.9313980916  |
| H113 | 13.4550779485# | -12.2303887427# | 53.1883137695# |
| C114 | 13.9110016728# | -11.6210552681# | 52.4219872140# |
| H115 | 14.6576041196  | -10.9550734117  | 52.8624419645  |
| H116 | 14.3408188816  | -12.2308993538  | 51.6231944423  |
| N117 | 12.7296192230  | -10.8923147133  | 51.9338144653  |
| H118 | 11.9410187228  | -10.7991659610  | 52.5954798966  |
| C119 | 12.6212753307  | -10.1560446683  | 50.8405302031  |
| N120 | 13.7167480288  | -9.8445348858   | 50.1013882126  |
| H121 | 13.5281926408  | -9.2378159386   | 49.3113290911  |
| H122 | 14.5084804678  | -9.4951839573   | 50.6517771371  |
| N123 | 11.3879907874  | -9.7805114819   | 50.4131415055  |
| H124 | 10.6406278249  | -9.9925322111   | 51.0801011599  |
| H125 | 11.3275121517  | -8.7969058836   | 50.1340149323  |
| H126 | 19.2019475911  | -8.2163304887   | 61.7093235311  |
| C127 | 19.5978933129# | -7.2298795947#  | 61.9900500755# |

|      |                |                |                |
|------|----------------|----------------|----------------|
| H128 | 20.6406211045  | -7.3641195038  | 62.2959595225  |
| C129 | 18.8344260642  | -6.6814960099  | 63.1941988421  |
| O130 | 19.3879045594  | -6.1891041430  | 64.1746597346  |
| C131 | 19.4918720166# | -6.2717980482# | 60.7990634787# |
| H132 | 19.8694283581  | -5.2838229886  | 61.0857811629  |
| H133 | 18.4386122989  | -6.1229671825  | 60.5398528431  |
| C134 | 20.2371381416  | -6.7782439484  | 59.5494357355  |
| H135 | 20.0032393899  | -7.8335889829  | 59.3637796029  |
| H136 | 21.3241023671  | -6.7419869233  | 59.7148158998  |
| C137 | 19.9683223809  | -6.0624745740  | 58.2188044511  |
| O138 | 20.2354348347  | -6.5877909236  | 57.1480801485  |
| O139 | 19.4567873948  | -4.8433600258  | 58.3627774851  |
| N140 | 17.4797149232  | -6.7629628212  | 63.0492541790  |
| H141 | 17.1210565606  | -7.0987283314  | 62.1637624911  |
| C142 | 16.5368854076# | -6.0058843383# | 63.8530414920# |
| H143 | 15.8865455666  | -6.6972524048  | 64.4083744961  |
| H144 | 17.1205535772  | -5.4402388817  | 64.5836011345  |
| C145 | 15.6691451794  | -5.0681382096  | 62.9801187655  |
| H146 | 16.2844349341  | -4.2474953653  | 62.5958149885  |
| H147 | 14.8984296854  | -4.6249419249  | 63.6254221775  |
| C148 | 15.0285031061  | -5.8029697076  | 61.8160639212  |
| C149 | 13.9878756299  | -6.7249763181  | 62.0183930931  |
| H150 | 13.5859771134  | -6.8694631672  | 63.0200441311  |
| C151 | 15.5168434008  | -5.6198177031  | 60.5116791622  |
| H152 | 16.2911891507  | -4.8764291974  | 60.3369114161  |
| C153 | 13.4543795337  | -7.4489764885  | 60.9501748969  |
| H154 | 12.6401173417  | -8.1487283297  | 61.1207050466  |
| C155 | 14.9912354408  | -6.3498437026  | 59.4395958371  |
| H156 | 15.3801018175  | -6.1966463631  | 58.4367901867  |
| C157 | 13.9604063090  | -7.2683739588  | 59.6584325686  |
| H158 | 13.5459782377  | -7.8339105804  | 58.8275632984  |
| H159 | 9.0037560472#  | 0.7050733335#  | 60.7752693345# |
| C160 | 8.1269803484#  | 0.1560803014#  | 60.4649996132# |
| H161 | 7.2836720063#  | 0.4592420217#  | 61.0677700037# |
| H268 | 8.5766101054   | -4.5759831878  | 54.8844187042  |
| H269 | 18.2592781145# | -9.4987529070# | 50.1505401512# |
| C270 | 17.5839755707# | -8.6559201270# | 50.1520260987# |
| H271 | 17.2773626234# | -8.4419892695# | 49.1387987548# |
| H273 | 23.2543263111  | -4.1142159740  | 52.4015686380  |
| H274 | 10.4518484760  | -5.9043092316  | 51.4249389337  |
| H275 | 15.1465914384  | -9.5512893930  | 56.7013887979  |
| H277 | 12.2829812034  | -5.5530729437  | 57.8783241365  |
| H278 | 11.1931465340  | -9.7873804705  | 56.5321306707  |
| H279 | 10.9167755393  | -7.4658591505  | 56.4837484366  |
| C280 | 6.7703109854   | -8.5758097809  | 56.0541926573  |
| H281 | 5.9982599804   | -7.8042500554  | 55.9381843529  |
| H282 | 7.1567885251   | -8.7950033546  | 55.0517510584  |
| H283 | 7.1493941107#  | -5.8354098952# | 59.8218942714# |
| C284 | 6.9590149674#  | -4.8009333484# | 59.5000035989# |
| H285 | 5.9039260033#  | -4.4903549879# | 59.5181449819# |
| H286 | 7.4684022920   | -4.1801929256  | 60.2526418680  |
| C287 | 7.5586458473   | -4.4488296119  | 58.1343715581  |
| H288 | 8.6201961954   | -4.7324350866  | 58.1076955378  |
| H289 | 7.5129755415   | -3.3587528818  | 58.0098877403  |
| O290 | 6.8623416785   | -4.9995052066  | 57.0275377134  |
| H291 | 7.2185473731   | -5.9102330485  | 56.9244449392  |

The TS structure for the allowed formation of H<sub>2</sub> from two hydrides in **Figure 3**  
Energies: E = -7921.453280, solv = -0.200796, disp = -228.55 Z<sub>0</sub> = 892.69

|     |               |               |               |
|-----|---------------|---------------|---------------|
| Mo1 | 16.2546360000 | -5.9428990000 | 53.4426960000 |
| Fe2 | 9.9246470000  | -9.0193980000 | 55.6594990000 |
| Fe3 | 10.9700700000 | -6.3743250000 | 55.3626530000 |
| Fe4 | 11.2264280000 | -8.0938240000 | 53.3027000000 |
| Fe5 | 12.4302860000 | -8.9143300000 | 55.8245890000 |
| Fe6 | 14.5306870000 | -8.1439680000 | 54.3444850000 |
| Fe7 | 13.8489780000 | -5.8945150000 | 55.5760650000 |
| Fe8 | 13.1892260000 | -6.2034930000 | 53.0682590000 |
| C9  | 17.6187330000 | -2.2819720000 | 54.4201410000 |
| H10 | 17.7785540000 | -1.2869200000 | 54.0010270000 |
| H11 | 16.5414180000 | -2.4019410000 | 54.5945860000 |
| C12 | 18.0671190000 | -3.3751700000 | 53.4251770000 |

|     |               |                |               |
|-----|---------------|----------------|---------------|
| C13 | 19.5458920000 | -3.1512730000  | 53.0185920000 |
| H14 | 20.1665900000 | -3.2388200000  | 53.9163240000 |
| H15 | 19.6291710000 | -2.1256860000  | 52.6423760000 |
| C16 | 20.0478920000 | -4.1295990000  | 51.9362840000 |
| H17 | 19.4835040000 | -3.9976250000  | 51.0109260000 |
| H18 | 19.9087170000 | -5.1559610000  | 52.2894530000 |
| C19 | 17.2179390000 | -3.4464590000  | 52.1257900000 |
| O20 | 16.7845050000 | -4.6374090000  | 51.8197370000 |
| O21 | 17.0837100000 | -2.4364200000  | 51.4369280000 |
| O22 | 17.9238910000 | -4.6433930000  | 54.0909630000 |
| C23 | 12.5568470000 | -7.3610280000  | 54.6148270000 |
| S24 | 12.1184410000 | -4.9444710000  | 57.0656770000 |
| S25 | 15.9926560000 | -6.8398270000  | 55.7711680000 |
| S26 | 9.4890150000  | -4.9591520000  | 54.0160310000 |
| S27 | 14.4346750000 | -10.2815040000 | 55.6238240000 |
| S28 | 14.3509730000 | -4.2839300000  | 53.8078810000 |
| S29 | 10.0933540000 | -10.0592300000 | 53.5529560000 |
| S30 | 14.9629250000 | -7.5791040000  | 52.1091890000 |
| S31 | 11.5006660000 | -6.6774460000  | 51.2507800000 |
| H32 | 13.6351740000 | -2.1902110000  | 49.0425560000 |
| C33 | 13.2979250000 | -2.0241170000  | 50.0550230000 |
| H34 | 13.9448320000 | -2.6085750000  | 50.7143560000 |
| H35 | 13.3786100000 | -0.9629830000  | 50.3164660000 |
| N36 | 11.9082060000 | -2.4963750000  | 50.1220850000 |
| H37 | 11.3235870000 | -2.2617650000  | 49.3328630000 |
| C38 | 11.2422570000 | -2.9279450000  | 51.2123400000 |
| N39 | 11.8116070000 | -3.0803750000  | 52.3916110000 |
| H40 | 11.2607010000 | -3.5513070000  | 53.1214700000 |
| H41 | 12.8265240000 | -3.1508290000  | 52.5362720000 |
| N42 | 9.8984950000  | -3.1384410000  | 51.1061310000 |
| H43 | 9.5562710000  | -3.4297170000  | 50.1998980000 |
| H44 | 9.4841110000  | -3.6541280000  | 51.8927030000 |
| H45 | 7.9301440000  | 0.3900490000   | 59.4127660000 |
| C46 | 8.3658420000  | -1.3529500000  | 60.6890350000 |
| H47 | 8.1863800000  | -1.5756190000  | 61.7482210000 |
| H48 | 7.6267230000  | -1.9261770000  | 60.1173710000 |
| C49 | 9.7537350000  | -1.8298420000  | 60.3722500000 |
| N50 | 10.7445900000 | -1.8039140000  | 61.3381600000 |
| C51 | 10.2603050000 | -2.3410490000  | 59.1971620000 |
| H52 | 9.8161110000  | -2.5519920000  | 58.2375130000 |
| C53 | 11.8189920000 | -2.2996430000  | 60.7519100000 |
| H54 | 12.7820290000 | -2.4539790000  | 61.2184500000 |
| N55 | 11.5823620000 | -2.6294290000  | 59.4529580000 |
| H56 | 19.1759960000 | -4.3673970000  | 57.5432580000 |
| H57 | 16.7151170000 | -8.8851020000  | 50.7671670000 |
| C58 | 18.3271530000 | -7.4200270000  | 50.6984960000 |
| H59 | 17.6687970000 | -6.5463850000  | 50.6824620000 |
| H60 | 19.1720950000 | -7.1954040000  | 50.0328250000 |
| C61 | 18.8547290000 | -7.5935120000  | 52.0909550000 |
| N62 | 18.1175260000 | -7.2594460000  | 53.2194900000 |
| C63 | 20.0804000000 | -8.0630680000  | 52.4994980000 |
| H64 | 20.9352580000 | -8.4115510000  | 51.9402070000 |
| C65 | 18.8769150000 | -7.5176360000  | 54.2734940000 |
| H66 | 18.6182480000 | -7.3297820000  | 55.3038210000 |
| N67 | 20.0700260000 | -8.0146810000  | 53.8827620000 |
| H68 | 20.8350980000 | -8.2018430000  | 54.5140760000 |
| H69 | 6.9382230000  | -10.5742740000 | 56.9329810000 |
| C70 | 6.1750520000  | -9.8249630000  | 56.6900010000 |
| H71 | 5.5309560000  | -10.2322290000 | 56.0424860000 |
| H72 | 5.6932330000  | -9.5371420000  | 57.6127210000 |
| S73 | 8.3221570000  | -8.0312360000  | 57.0048590000 |
| H74 | 12.1982260000 | -3.1161630000  | 58.8046350000 |
| H75 | 18.1365470000 | -4.4418630000  | 55.0846070000 |
| C76 | 18.3165600000 | -2.3771210000  | 55.8010880000 |
| O77 | 18.5538250000 | -3.5786510000  | 56.2232520000 |
| O78 | 18.5637160000 | -1.3335960000  | 56.4260860000 |
| C79 | 21.5027540000 | -3.9304930000  | 51.6023930000 |
| O80 | 21.9621200000 | -3.5244760000  | 50.5532190000 |
| O81 | 22.3208180000 | -4.2658020000  | 52.6398600000 |
| H82 | 15.7024660000 | -0.1996320000  | 61.4912310000 |
| C83 | 14.8549930000 | -0.0829910000  | 60.8320020000 |
| H84 | 13.9165020000 | -0.2867340000  | 61.3260940000 |
| H85 | 14.8292240000 | 0.9919990000   | 60.5866230000 |
| C86 | 15.0599860000 | -0.8751940000  | 59.5441990000 |
| H87 | 14.3903070000 | -0.4915960000  | 58.7641340000 |

|      |               |                |               |
|------|---------------|----------------|---------------|
| H88  | 14.7848230000 | -1.9240620000  | 59.7043780000 |
| C89  | 16.5039950000 | -0.8445980000  | 59.0406730000 |
| H90  | 16.9333220000 | 0.1636450000   | 59.1372130000 |
| H91  | 16.5599140000 | -1.0784780000  | 57.9716080000 |
| C92  | 17.4126730000 | -1.8324160000  | 59.7845780000 |
| O93  | 17.0464470000 | -2.4487280000  | 60.7892480000 |
| N94  | 18.6606860000 | -1.9503020000  | 59.2518620000 |
| H95  | 19.1735810000 | -2.7690300000  | 59.5581160000 |
| H96  | 18.7854390000 | -1.6942360000  | 58.2630570000 |
| C97  | 10.6519930000 | 0.0100030000   | 53.3460010000 |
| H98  | 11.1636990000 | 0.9592720000   | 53.2872700000 |
| H99  | 9.5863320000  | 0.1850130000   | 53.3579380000 |
| H100 | 10.9209050000 | -0.5856820000  | 52.4716090000 |
| C101 | 11.0636350000 | -0.6602470000  | 54.6741400000 |
| H102 | 10.7137300000 | -1.7010800000  | 54.6676570000 |
| C103 | 10.3822630000 | 0.0483470000   | 55.8559120000 |
| H104 | 9.2887000000  | 0.0116550000   | 55.7670450000 |
| H105 | 10.6783070000 | 1.1061750000   | 55.9028690000 |
| H106 | 10.6554110000 | -0.4146120000  | 56.8108110000 |
| C107 | 12.5874230000 | -0.6620220000  | 54.8579810000 |
| H108 | 13.1035800000 | -1.1547390000  | 54.0280210000 |
| H109 | 12.8755730000 | -1.1899620000  | 55.7735200000 |
| H110 | 12.9684640000 | 0.3668490000   | 54.9287980000 |
| H111 | 13.4550780000 | -12.2303890000 | 53.1883140000 |
| C112 | 13.9110020000 | -11.6210550000 | 52.4219870000 |
| H113 | 14.6243420000 | -10.9252910000 | 52.8712790000 |
| H114 | 14.3945330000 | -12.2374650000 | 51.6585340000 |
| N115 | 12.7353890000 | -10.9417710000 | 51.8657910000 |
| H116 | 11.9098980000 | -10.8677970000 | 52.4964350000 |
| C117 | 12.6550500000 | -10.2161000000 | 50.7670240000 |
| N118 | 13.7698260000 | -9.8741030000  | 50.0696930000 |
| H119 | 13.5889090000 | -9.2797070000  | 49.2683810000 |
| H120 | 14.5144660000 | -9.4800760000  | 50.6564060000 |
| N121 | 11.4279380000 | -9.8699880000  | 50.2882200000 |
| H122 | 10.6678900000 | -10.1065990000 | 50.9317060000 |
| H123 | 11.3561110000 | -8.8826650000  | 50.0299430000 |
| H124 | 19.2063060000 | -8.2182800000  | 61.7095210000 |
| C125 | 19.5978930000 | -7.2298800000  | 61.9900500000 |
| H126 | 20.6404980000 | -7.3596610000  | 62.2982760000 |
| C127 | 18.8300380000 | -6.6834150000  | 63.1900520000 |
| O128 | 19.3811760000 | -6.2012060000  | 64.1763030000 |
| C129 | 19.4918720000 | -6.2717980000  | 60.7990630000 |
| H130 | 19.8624660000 | -5.2827210000  | 61.0903830000 |
| H131 | 18.4390610000 | -6.1260220000  | 60.5359660000 |
| C132 | 20.2406280000 | -6.7682450000  | 59.5511940000 |
| H133 | 20.0062140000 | -7.8214300000  | 59.3532470000 |
| H134 | 21.3277190000 | -6.7327200000  | 59.7152650000 |
| C135 | 19.9610020000 | -6.0298780000  | 58.2370600000 |
| O136 | 20.2337040000 | -6.5271090000  | 57.1546900000 |
| O137 | 19.4265600000 | -4.8269550000  | 58.4128210000 |
| N138 | 17.4760700000 | -6.7471180000  | 63.0338490000 |
| H139 | 17.1141120000 | -7.0969440000  | 62.1555750000 |
| C140 | 16.5368850000 | -6.0058840000  | 63.8530410000 |
| H141 | 15.9246810000 | -6.7019540000  | 64.4451090000 |
| H142 | 17.1277010000 | -5.4076410000  | 64.5516160000 |
| C143 | 15.6123080000 | -5.1080000000  | 62.9962870000 |
| H144 | 16.1988020000 | -4.2991430000  | 62.5466290000 |
| H145 | 14.8781260000 | -4.6465480000  | 63.6705020000 |
| C146 | 14.9086450000 | -5.8972820000  | 61.9082610000 |
| C147 | 13.8659490000 | -6.7857780000  | 62.2167290000 |
| H148 | 13.5000200000 | -6.8469330000  | 63.2405430000 |
| C149 | 15.3481680000 | -5.8184030000  | 60.5772430000 |
| H150 | 16.1233790000 | -5.1000180000  | 60.3182560000 |
| C151 | 13.2905520000 | -7.5857230000  | 61.2288980000 |
| H152 | 12.4772140000 | -8.2614300000  | 61.4826720000 |
| C153 | 14.7822070000 | -6.6274280000  | 59.5852340000 |
| H154 | 15.1383540000 | -6.5557330000  | 58.5607930000 |
| C155 | 13.7554060000 | -7.5177190000  | 59.9113480000 |
| H156 | 13.3120870000 | -8.1473660000  | 59.1436330000 |
| H157 | 9.0037560000  | 0.7050730000   | 60.7752690000 |
| C158 | 8.1269800000  | 0.1560800000   | 60.4650000000 |
| H159 | 7.2836720000  | 0.4592420000   | 61.0677700000 |
| H160 | 8.6034780000  | -4.5234410000  | 54.9406010000 |
| H161 | 18.2592780000 | -9.4987530000  | 50.1505400000 |
| C162 | 17.5839760000 | -8.6559200000  | 50.1520260000 |

|      |               |               |               |
|------|---------------|---------------|---------------|
| H163 | 17.2773630000 | -8.4419890000 | 49.1387990000 |
| H164 | 23.2230980000 | -4.0703700000 | 52.3259990000 |
| H165 | 10.3487910000 | -6.0591740000 | 51.6053590000 |
| H166 | 15.1219200000 | -9.7653020000 | 56.6661930000 |
| H167 | 12.2017910000 | -5.8590930000 | 58.0567430000 |
| H168 | 11.5295660000 | -9.6155500000 | 57.0320710000 |
| H169 | 11.1215940000 | -8.5526970000 | 56.9328760000 |
| C170 | 6.8408750000  | -8.6038350000 | 56.0456110000 |
| H171 | 6.1260860000  | -7.7740640000 | 55.9794890000 |
| H172 | 7.1546590000  | -8.8424770000 | 55.0230530000 |
| H173 | 7.1493940000  | -5.8354100000 | 59.8218940000 |
| C174 | 6.9590150000  | -4.8009330000 | 59.5000040000 |
| H175 | 5.9039260000  | -4.4903550000 | 59.5181450000 |
| H176 | 7.4725740000  | -4.1744710000 | 60.2445120000 |
| C177 | 7.5697320000  | -4.4859510000 | 58.1304510000 |
| H178 | 8.6413700000  | -4.7282470000 | 58.1406440000 |
| H179 | 7.4841610000  | -3.4055760000 | 57.9508990000 |
| O180 | 6.9257160000  | -5.1253760000 | 57.0399090000 |
| H181 | 7.3634100000  | -6.0001420000 | 56.9444270000 |

The structure after the release of the two hydrides.

Energies: E= -7920.281890, solv = -0.199815, disp = -226.64 Z<sub>0</sub> = 885.74

|     |                |                |                |
|-----|----------------|----------------|----------------|
| Mo1 | 15.9786157245  | -6.0530086731  | 53.3713978187  |
| Fe2 | 9.3481601484   | -9.3112767567  | 54.7677527995  |
| Fe3 | 10.4484024847  | -6.3183215552  | 54.6777932723  |
| Fe4 | 11.0371418867  | -8.3110448022  | 52.7984635305  |
| Fe5 | 11.8750582339  | -8.9512876818  | 55.2395193576  |
| Fe6 | 14.1753459189  | -8.2044621520  | 54.2845004621  |
| Fe7 | 13.3130584704  | -5.9607140118  | 55.3169342185  |
| Fe8 | 12.9320505252  | -6.3144394860  | 52.7497163676  |
| C9  | 17.3409128478  | -2.4230577899  | 54.3334515170  |
| H10 | 17.4696046076  | -1.4293468647  | 53.9010739329  |
| H11 | 16.2674793448  | -2.5870129097  | 54.4939238054  |
| C12 | 17.8603230461  | -3.5130124806  | 53.3672349884  |
| C13 | 19.3525087131  | -3.2281604668  | 53.0498003317  |
| H14 | 19.9164319624  | -3.2531414760  | 53.9888520821  |
| H15 | 19.3985372337  | -2.2091550547  | 52.6514204633  |
| C16 | 20.0062314999  | -4.1851448074  | 52.0299372002  |
| H17 | 19.4580273945  | -4.1477890589  | 51.0849791395  |
| H18 | 19.9905421465  | -5.2077817201  | 52.4150178484  |
| C19 | 17.0810135048  | -3.6155257578  | 52.0228670069  |
| O20 | 16.6120866421  | -4.8004037530  | 51.7453430758  |
| O21 | 17.0223621639  | -2.6326649501  | 51.2848977890  |
| O22 | 17.7011339066  | -4.7786752419  | 54.0363101289  |
| C23 | 12.1090210134  | -7.3488425461  | 54.2488350680  |
| S24 | 11.3975683454  | -4.8792066444  | 56.5129317644  |
| S25 | 15.5030633764  | -6.8239706303  | 55.7172163983  |
| S26 | 8.8704325489   | -5.0212217650  | 53.3560497541  |
| S28 | 13.8183834085  | -10.3289260959 | 55.6324768613  |
| S29 | 14.0526012566  | -4.3821900167  | 53.5826582133  |
| S30 | 9.7536823092   | -10.2420036190 | 52.7478505053  |
| S31 | 14.7799879504  | -7.7434003317  | 52.0563435530  |
| S32 | 11.5096314719  | -6.8498419000  | 50.7487267080  |
| H33 | 13.6351741874# | -2.1902105239# | 49.0425559793# |
| C34 | 13.2979245834# | -2.0241172419# | 50.0550231893# |
| H35 | 13.8095081243  | -2.7386245892  | 50.7037974193  |
| H36 | 13.5309561625  | -1.0057462099  | 50.3818932338  |
| N37 | 11.8477786588  | -2.2710807758  | 50.0409465413  |
| H38 | 11.3316501330  | -1.8421047133  | 49.2859970744  |
| C39 | 11.0801045709  | -2.8428688119  | 50.9878552937  |
| N40 | 11.5280804082  | -3.2239682624  | 52.1649283872  |
| H41 | 10.8971217469  | -3.7955841766  | 52.7431115572  |
| H42 | 12.5253309750  | -3.2995102944  | 52.4204754038  |
| N43 | 9.7399303599   | -2.9572968783  | 50.7291274615  |
| H44 | 9.4937711072   | -3.1699391184  | 49.7703763675  |
| H45 | 9.2300211980   | -3.5262876770  | 51.4172883982  |
| H46 | 7.9293738348   | 0.3951682480   | 59.4142172039  |
| C47 | 8.3619532911   | -1.3516577072  | 60.6739789071  |
| H48 | 8.3098741090   | -1.5685112139  | 61.7479630540  |
| H49 | 7.5453221847   | -1.9098855595  | 60.2000677305  |
| C50 | 9.6889112278   | -1.8565657928  | 60.1891584334  |
| N51 | 10.7631114790  | -1.9685560916  | 61.0546134017  |

|      |                |                 |                |
|------|----------------|-----------------|----------------|
| C52  | 10.0574503299  | -2.2745740059   | 58.9308869127  |
| H53  | 9.5192463894   | -2.3661646930   | 58.0015833218  |
| C54  | 11.7505677067  | -2.4560278841   | 60.3272397826  |
| H55  | 12.7417902856  | -2.6980666247   | 60.6846298134  |
| N56  | 11.3797498928  | -2.6456058144   | 59.0311240421  |
| H57  | 18.9712031863  | -4.4557002682   | 57.4989376967  |
| H58  | 16.7034709120  | -8.9057624170   | 50.7432482405  |
| C59  | 18.3010028148  | -7.4374359273   | 50.7658730771  |
| H60  | 17.6594379037  | -6.5532029719   | 50.7062569796  |
| H61  | 19.2051697401  | -7.2189671696   | 50.1810092638  |
| C62  | 18.6987472707  | -7.6387238915   | 52.2007387100  |
| N63  | 17.8310612322  | -7.4038675082   | 53.2612303596  |
| C64  | 19.9035872273  | -8.0530223244   | 52.7166619979  |
| H65  | 20.8298088417  | -8.3269028183   | 52.2352420819  |
| C66  | 18.4948272201  | -7.6699835405   | 54.3746509717  |
| H67  | 18.1165463332  | -7.5416520410   | 55.3768462707  |
| N68  | 19.7499852108  | -8.0788042974   | 54.0933340641  |
| H69  | 20.4652847312  | -8.1933886652   | 54.7977133857  |
| H70  | 6.9415877129   | -10.5715359783  | 56.9230207610  |
| C71  | 6.1750524117#  | -9.8249631450#  | 56.6900008555# |
| H72  | 5.5309557423#  | -10.2322287496# | 56.0424861180# |
| H73  | 5.6932326974#  | -9.5371417149#  | 57.6127207422# |
| S74  | 8.5605755112   | -8.2249355125   | 56.6357703027  |
| H75  | 11.8946678789  | -3.1211309955   | 58.2943251553  |
| H76  | 17.8676219633  | -4.5690143844   | 55.0287956395  |
| C78  | 18.0443658910  | -2.4755346447   | 55.7151926069  |
| O79  | 18.2456184474  | -3.6616678054   | 56.1942826563  |
| O80  | 18.3480658505  | -1.4071658751   | 56.2755955659  |
| C81  | 21.4264385479  | -3.7662150746   | 51.7369087287  |
| O82  | 21.7959557446  | -3.0463662642   | 50.8303085915  |
| O83  | 22.3208176210# | -4.2658020399#  | 52.6398596315# |
| H84  | 15.7024656850# | -0.1996317030#  | 61.4912312810# |
| C85  | 14.8549934399# | -0.0829911764#  | 60.8320021192# |
| H86  | 13.9165015895# | -0.2867338793#  | 61.3260937710# |
| H87  | 14.8246388773  | 0.9910003317    | 60.5813923386  |
| C88  | 15.0599857376# | -0.8751944209#  | 59.5441990260# |
| H89  | 14.3503943675  | -0.5339410595   | 58.7799009973  |
| H90  | 14.8465785620  | -1.9364152596   | 59.7180283902  |
| C91  | 16.4905712506  | -0.7594129173   | 59.0028932876  |
| H92  | 16.8494178538  | 0.2775265456    | 59.0911773174  |
| H93  | 16.5367946218  | -0.9903519139   | 57.9334568702  |
| C94  | 17.4863211555  | -1.6710596029   | 59.7337844497  |
| O95  | 17.2445973083  | -2.1811954328   | 60.8336377441  |
| N96  | 18.6666602869  | -1.8497522206   | 59.0821266586  |
| H97  | 19.2298461159  | -2.6177004535   | 59.4285530329  |
| H98  | 18.6980955794  | -1.6827261042   | 58.0655364936  |
| C99  | 10.6519927028# | 0.0100032806#   | 53.3460013412# |
| H100 | 11.1636988270# | 0.9592721370#   | 53.2872697081# |
| H101 | 9.5863320423#  | 0.1850132898#   | 53.3579375313# |
| H102 | 10.9138370918  | -0.5783366384   | 52.4631050014  |
| C103 | 11.0744714500  | -0.6822626396   | 54.6547942212  |
| H104 | 10.6745018523  | -1.7055751714   | 54.6532670951  |
| C105 | 10.4720824536  | 0.0583055153    | 55.8572988505  |
| H106 | 9.3755281623   | 0.0774871636    | 55.8062245453  |
| H107 | 10.8224111539  | 1.0998255879    | 55.8888380323  |
| H108 | 10.7541233548  | -0.4158757426   | 56.8030054641  |
| C109 | 12.6001872748  | -0.7675359909   | 54.7807156214  |
| H110 | 13.0516793834  | -1.3172200687   | 53.9488367276  |
| H111 | 12.8920958417  | -1.2875482990   | 55.6995241772  |
| H112 | 13.0438204125  | 0.2380405916    | 54.8060654728  |
| H113 | 13.4550779258# | -12.2303887227# | 53.1883137719# |
| C114 | 13.9110017164# | -11.6210552920# | 52.4219871994# |
| H115 | 14.4914353211  | -10.8182412803  | 52.8824322588  |
| H116 | 14.5434736779  | -12.2274588495  | 51.7666147599  |
| N117 | 12.7516933533  | -11.1101259655  | 51.6783283282  |
| H118 | 11.8514298911  | -11.0772643542  | 52.1882947232  |
| C119 | 12.7656353081  | -10.4327667166  | 50.5422219362  |
| N120 | 13.9409424427  | -10.0740172546  | 49.9635260879  |
| H121 | 13.8329159625  | -9.5098283382   | 49.1280094088  |
| H122 | 14.6023674405  | -9.6353259303   | 50.6155041318  |
| N123 | 11.5937771861  | -10.1599325165  | 49.9071117000  |
| H124 | 10.7666137136  | -10.3747040811  | 50.4749434969  |
| H125 | 11.5320608137  | -9.1942774503   | 49.5759191597  |
| H126 | 19.2066221331  | -8.2171667823   | 61.7042894412  |
| C127 | 19.5978933700# | -7.2298795547#  | 61.9900501054# |

|      |                |                |                |
|------|----------------|----------------|----------------|
| H128 | 20.6387003595  | -7.3639540322  | 62.3015805516  |
| C129 | 18.8229541742  | -6.7058338706  | 63.1966162387  |
| O130 | 19.3647527421  | -6.2935793475  | 64.2195521528  |
| C131 | 19.4918719313# | -6.2717981033# | 60.7990634579# |
| H132 | 19.9303737561  | -5.3030017516  | 61.0644281609  |
| H133 | 18.4385131549  | -6.0651983152  | 60.5845954651  |
| C134 | 20.1431766187  | -6.8110369086  | 59.5117250601  |
| H135 | 19.8650324098  | -7.8605405629  | 59.3531071715  |
| H136 | 21.2392341413  | -6.8092212994  | 59.6004661223  |
| C137 | 19.8023901133  | -6.0976686763  | 58.1943696950  |
| O138 | 20.0362082643  | -6.6164697955  | 57.1119290485  |
| O139 | 19.2603830787  | -4.8966757361  | 58.3645397920  |
| N140 | 17.4702073773  | -6.7290688670  | 63.0122778754  |
| H141 | 17.1206266920  | -6.9904373431  | 62.0988223870  |
| C142 | 16.5368854072# | -6.0058843436# | 63.8530414923# |
| H143 | 15.8175069514  | -6.7107433356  | 64.2945306254  |
| H144 | 17.1182965252  | -5.5701815783  | 64.6693690301  |
| C145 | 15.7735392645  | -4.9132375542  | 63.0695536558  |
| H146 | 16.4656922558  | -4.1131864953  | 62.7855154551  |
| H147 | 15.0299268633  | -4.4735430044  | 63.7486332110  |
| C148 | 15.0952589771  | -5.4519492986  | 61.8225003837  |
| C149 | 13.9749998003  | -6.2948723709  | 61.9064765812  |
| H150 | 13.5525541991  | -6.5321815827  | 62.8818083274  |
| C151 | 15.6103937826  | -5.1454763819  | 60.5517346480  |
| H152 | 16.4521934546  | -4.4625567992  | 60.4728998107  |
| C153 | 13.3872625241  | -6.8213874179  | 60.7536799211  |
| H154 | 12.5155395741  | -7.4661106346  | 60.8362849468  |
| C155 | 15.0256429449  | -5.6735793279  | 59.3953154900  |
| H156 | 15.4328658091  | -5.4378667205  | 58.4163170951  |
| C157 | 13.9153953145  | -6.5161950117  | 59.4948871811  |
| H158 | 13.4707614628  | -6.9258042325  | 58.5925079605  |
| H159 | 9.0037560430#  | 0.7050733583#  | 60.7752693026# |
| C160 | 8.1269803503#  | 0.1560802579#  | 60.4649996038# |
| H161 | 7.2836720136#  | 0.4592420062#  | 61.0677700217# |
| H268 | 8.3383159255   | -4.2806392467  | 54.3537621415  |
| H269 | 18.2592781072# | -9.4987529129# | 50.1505401614# |
| C270 | 17.5839754677# | -8.6559201455# | 50.1520261458# |
| H271 | 17.2773626691# | -8.4419892550# | 49.1387987440# |
| H273 | 23.1792159666  | -3.8817894912  | 52.3804389159  |
| H274 | 10.2918247550  | -6.2863965306  | 50.9385173672  |
| H275 | 14.2617735917  | -9.6952414115  | 56.7414325622  |
| H277 | 11.2361738372  | -5.7767055266  | 57.5109280121  |
| C280 | 6.8163438753   | -8.5816081749  | 56.0395791124  |
| H281 | 6.2238188556   | -7.6871198559  | 56.2539216885  |
| H282 | 6.8266476921   | -8.6925198147  | 54.9493463237  |
| H283 | 7.1493941634#  | -5.8354098671# | 59.8218943305# |
| C284 | 6.9590148206#  | -4.8009335304# | 59.5000034994# |
| H285 | 5.9039260167#  | -4.4903549437# | 59.5181450068# |
| H286 | 7.4895591738   | -4.1573429560  | 60.2140153829  |
| C287 | 7.5421121473   | -4.5546501985  | 58.1041174706  |
| H288 | 8.6254344880   | -4.7216605826  | 58.1153151084  |
| H289 | 7.3852302917   | -3.5003305799  | 57.8355062464  |
| O290 | 6.9312308768   | -5.3427432753  | 57.0884387413  |
| H291 | 7.5480927902   | -6.0682842102  | 56.8731524370  |

The structure for N<sub>2</sub> in **Figure 4**.

Energies: E= -8029.790879, solv = -0.199051, disp = -238.63 Z<sub>0</sub> = 891.62

|     |               |               |               |
|-----|---------------|---------------|---------------|
| Mo1 | 16.2787090531 | -5.7390151085 | 53.1488740126 |
| Fe2 | 8.9151540968  | -7.0742319777 | 54.3801411975 |
| Fe3 | 11.0951762065 | -5.4303080208 | 54.9076875636 |
| Fe4 | 10.9370048500 | -7.1514308352 | 52.8055192059 |
| Fe5 | 11.7761269255 | -8.2995030988 | 55.0799319009 |
| Fe6 | 14.2636701137 | -7.7490549556 | 53.9035596539 |
| Fe7 | 13.8029061876 | -5.3957659377 | 55.0373223719 |
| Fe8 | 13.1425715055 | -5.6762538257 | 52.3843423109 |
| C9  | 17.7129949285 | -2.1752995951 | 54.2173352797 |
| H10 | 17.9220055745 | -1.1776326596 | 53.8269276703 |
| H11 | 16.6249066517 | -2.2647265066 | 54.3301420575 |
| C12 | 18.1843797360 | -3.2613624674 | 53.2265217226 |
| C13 | 19.6796456008 | -3.0655505155 | 52.8763002692 |
| H14 | 20.2736507924 | -3.2497689548 | 53.7767957617 |
| H15 | 19.8167485214 | -2.0183348814 | 52.5845455383 |



|     |                |                 |                |
|-----|----------------|-----------------|----------------|
| C16 | 20.1633335739  | -3.9736087636   | 51.7255581582  |
| H17 | 19.6788435829  | -3.7005541438   | 50.7868366435  |
| H18 | 19.9076861272  | -5.0128757497   | 51.9610904810  |
| C19 | 17.4190130621  | -3.3179981828   | 51.8699839624  |
| O20 | 17.0240959764  | -4.5120131959   | 51.5280543761  |
| O21 | 17.3513465865  | -2.3044155511   | 51.1756101305  |
| O22 | 17.9933509025  | -4.5379951123   | 53.8716664542  |
| C23 | 12.4184203319  | -6.5939536150   | 54.0222741024  |
| S24 | 12.3132184867  | -4.2226709993   | 56.6006261501  |
| S25 | 15.7829607921  | -6.6019947038   | 55.4390667239  |
| S26 | 9.0897003108   | -4.8802942298   | 53.7900627604  |
| S27 | 13.7595845690  | -9.7956738894   | 55.1842211219  |
| S28 | 14.5215135842  | -3.9089543981   | 53.2580973109  |
| S29 | 9.9367069311   | -9.1559797960   | 53.6068759101  |
| S30 | 14.9025030917  | -7.2503221595   | 51.7219295602  |
| S31 | 11.5558610512  | -6.3053465299   | 50.5324422170  |
| H32 | 13.6351741733# | -2.1902104694#  | 49.0425559659# |
| C33 | 13.2979244972# | -2.0241174665#  | 50.0550234519# |
| H34 | 13.8410050191  | -2.7109163971   | 50.7094158245  |
| H35 | 13.5087877948  | -0.9935587327   | 50.3606089158  |
| N36 | 11.8544810957  | -2.3068194144   | 50.0810717315  |
| H37 | 11.3159444354  | -1.9975504228   | 49.2848394380  |
| C38 | 11.1366960765  | -2.7707355628   | 51.1183754317  |
| N39 | 11.6608966125  | -2.9979694532   | 52.3078036718  |
| H40 | 11.0923798518  | -3.5182426578   | 52.9857691444  |
| H41 | 12.6746234852  | -2.9861082850   | 52.5036917810  |
| N42 | 9.7921998763   | -2.9493773743   | 50.9572117192  |
| H43 | 9.4829016702   | -3.2003236416   | 50.0266301223  |
| H44 | 9.3434072373   | -3.5016858758   | 51.7024317719  |
| H45 | 7.9321911951   | 0.3970560075    | 59.4141771699  |
| C46 | 8.3443096069   | -1.3565684796   | 60.6762940323  |
| H47 | 8.1925875410   | -1.5885545903   | 61.7373929435  |
| H48 | 7.5776265658   | -1.9091079773   | 60.1194414684  |
| C49 | 9.7159216052   | -1.8413151843   | 60.3163722924  |
| N50 | 10.6969972957  | -1.9461230133   | 61.2863414242  |
| C51 | 10.2285532644  | -2.1974111228   | 59.0892545298  |
| H52 | 9.7968411285   | -2.2665370869   | 58.1030566705  |
| C53 | 11.7742685894  | -2.3662829134   | 60.6493768943  |
| H54 | 12.7337389496  | -2.5834011839   | 61.0979564458  |
| N55 | 11.5460425687  | -2.5224831253   | 59.3186069422  |
| H56 | 19.0743504188  | -4.3583495018   | 57.4963669947  |
| H57 | 16.7212917553  | -8.8480422708   | 50.7848167964  |
| C58 | 18.3829715687  | -7.4278982611   | 50.6399547175  |
| H59 | 17.7786102507  | -6.5206480690   | 50.5501965848  |
| H60 | 19.2537750756  | -7.2975167894   | 49.9825171368  |
| C61 | 18.8575028611  | -7.5468366885   | 52.0538250907  |
| N62 | 18.0437113545  | -7.2016841066   | 53.1221555741  |
| C63 | 20.0609762962  | -7.9895053647   | 52.5480836290  |
| H64 | 20.9522123788  | -8.3438038132   | 52.0532914381  |
| C65 | 18.7355334623  | -7.4281606254   | 54.2277751975  |
| H66 | 18.4044117112  | -7.2202951192   | 55.2331317295  |
| N67 | 19.9584683708  | -7.9164474921   | 53.9280835694  |
| H68 | 20.6868170395  | -8.0536145730   | 54.6140654157  |
| H69 | 6.9567389594   | -10.5594889093  | 56.9115091512  |
| C70 | 6.1750542860#  | -9.8249628600#  | 56.6900012482# |
| H71 | 5.5309554283#  | -10.2322280016# | 56.0424859602# |
| H72 | 5.6932325576#  | -9.5371415300#  | 57.6127206113# |
| S73 | 8.2949197606   | -7.9659834914   | 56.7600210824  |
| H74 | 12.1850824585  | -2.8712512506   | 58.6088235991  |
| H75 | 18.1659118294  | -4.3626890862   | 54.8726092913  |
| C76 | 18.3297461629  | -2.3005157643   | 55.6363590491  |
| O77 | 18.5246477542  | -3.5037912610   | 56.0712615684  |
| O78 | 18.5559882730  | -1.2516190876   | 56.2689471658  |
| C79 | 21.6476007397  | -3.8956863082   | 51.5163589193  |
| O80 | 22.2429152426  | -3.5635604229   | 50.5094530199  |
| O81 | 22.3208172403# | -4.2658019944#  | 52.6398596086# |
| H82 | 15.7024655200# | -0.1996320045#  | 61.4912314402# |
| C83 | 14.8549937829# | -0.0829907282#  | 60.8320018979# |
| H84 | 13.9165015893# | -0.2867338795#  | 61.3260937710# |
| H85 | 14.8211820303  | 0.9907508080    | 60.5802990204  |
| C86 | 15.0599854361# | -0.8751945415#  | 59.5441990510# |
| H87 | 14.3237979751  | -0.5639882682   | 58.7922789032  |
| H88 | 14.8897537817  | -1.9432733073   | 59.7274025096  |
| C89 | 16.4741858402  | -0.7074075199   | 58.9688776476  |
| H90 | 16.767777978   | 0.3533033702    | 58.9848836807  |

|      |                |                 |                |
|------|----------------|-----------------|----------------|
| H91  | 16.5154964950  | -1.0031074099   | 57.9147242792  |
| C92  | 17.5401890602  | -1.5049712088   | 59.7340474661  |
| O93  | 17.3508526731  | -1.9565489679   | 60.8704057325  |
| N94  | 18.7167905433  | -1.6519352022   | 59.0731005144  |
| H95  | 19.3451939319  | -2.3414400465   | 59.4673826977  |
| H96  | 18.7585690360  | -1.5111794123   | 58.0506256638  |
| C97  | 10.6519926840# | 0.0100029641#   | 53.3460013939# |
| H98  | 11.1636988660# | 0.9592721207#   | 53.2872697838# |
| H99  | 9.5863320625#  | 0.1850134171#   | 53.3579374284# |
| H100 | 10.9222937132  | -0.5856403503   | 52.4743277598  |
| C101 | 11.0733483059  | -0.6424336403   | 54.6776912847  |
| H102 | 10.7251619280  | -1.6836328403   | 54.6926355758  |
| C103 | 10.4003366027  | 0.0904813315    | 55.8484041866  |
| H104 | 9.3061118612   | 0.0284371533    | 55.7825248465  |
| H105 | 10.6747853594  | 1.1553234857    | 55.8525079866  |
| H106 | 10.7029662548  | -0.3321296005   | 56.8122916836  |
| C107 | 12.5983323710  | -0.6362355795   | 54.8479139168  |
| H108 | 13.1111800158  | -1.1461995370   | 54.0263228839  |
| H109 | 12.8950131274  | -1.1449579855   | 55.7713239932  |
| H110 | 12.9759876270  | 0.3956672053    | 54.8921816780  |
| H111 | 13.4550778651# | -12.2303885056# | 53.1883139083# |
| C112 | 13.9110017574# | -11.6210555686# | 52.4219869583# |
| H113 | 14.7543022690  | -11.0690948729  | 52.8414846854  |
| H114 | 14.2174783374  | -12.2246652584  | 51.5631706690  |
| N115 | 12.8009695536  | -10.7341988102  | 52.0334467314  |
| H116 | 12.0650736255  | -10.5731387883  | 52.7256145038  |
| C117 | 12.6697556216  | -10.0482291806  | 50.9037252372  |
| N118 | 13.7426364744  | -9.8773772485   | 50.0844604342  |
| H119 | 13.5441444083  | -9.2939570676   | 49.2782036883  |
| H120 | 14.5553563747  | -9.5044869105   | 50.5859592998  |
| N121 | 11.4541161290  | -9.5954061330   | 50.5388852582  |
| H122 | 10.7389408787  | -9.6503006099   | 51.2768375567  |
| H123 | 11.4382021504  | -8.6683037525   | 50.1024417285  |
| H124 | 19.1993744344  | -8.2158808291   | 61.7092991956  |
| C125 | 19.5978934917# | -7.2298793897#  | 61.9900503598# |
| H126 | 20.6393268880  | -7.3696688239   | 62.2977239981  |
| C127 | 18.8306260408  | -6.6945012722   | 63.1974856055  |
| O128 | 19.3794524831  | -6.2544492185   | 64.2049048709  |
| C129 | 19.4918716546# | -6.2717983710#  | 60.7990633514# |
| H130 | 19.9370678878  | -5.3066563419   | 61.0685636111  |
| H131 | 18.4378065707  | -6.0565634398   | 60.5956992663  |
| C132 | 20.1262568212  | -6.7900591243   | 59.4948377446  |
| H133 | 19.7919723516  | -7.8153749698   | 59.2900258768  |
| H134 | 21.2196097782  | -6.8547163296   | 59.5918310156  |
| C135 | 19.8519101895  | -6.0122446645   | 58.1925409724  |
| O136 | 20.1619247470  | -6.4791405201   | 57.1065150153  |
| O137 | 19.2815322571  | -4.8233216929   | 58.3705385875  |
| N138 | 17.4757748975  | -6.7456735893   | 63.0313655166  |
| H139 | 17.1266982378  | -7.0155679131   | 62.1201283690  |
| C140 | 16.5368852960# | -6.0058844230#  | 63.8530408424# |
| H141 | 15.7947914006  | -6.7017561089   | 64.2692392790  |
| H142 | 17.1052771146  | -5.5865999962   | 64.6868355370  |
| C143 | 15.8103547253  | -4.8951365747   | 63.0567097998  |
| H144 | 16.5042671257  | -4.0712124230   | 62.8584746087  |
| H145 | 15.0081086293  | -4.4980209861   | 63.6942916785  |
| C146 | 15.2499478968  | -5.3989419453   | 61.7382416018  |
| C147 | 14.1846033907  | -6.3138658228   | 61.6948089502  |
| H148 | 13.7023659386  | -6.6238506731   | 62.6209839577  |
| C149 | 15.8431181951  | -5.0013739322   | 60.5282827744  |
| H150 | 16.6428744851  | -4.2658069807   | 60.5473574472  |
| C151 | 13.7284531447  | -6.8235906674   | 60.4758796597  |
| H152 | 12.8949111018  | -7.5199413933   | 60.4520648115  |
| C153 | 15.3917337647  | -5.5137251498   | 59.3068252797  |
| H154 | 15.8571470355  | -5.2044927829   | 58.3752138965  |
| C155 | 14.3368200302  | -6.4295517724   | 59.2792872959  |
| H156 | 13.9947108056  | -6.8249934857   | 58.3283215392  |
| H157 | 9.0037559556#  | 0.7050735312#   | 60.7752692435# |
| C158 | 8.1269806174#  | 0.1560800139#   | 60.4649996035# |
| H159 | 7.2836720101#  | 0.4592419705#   | 61.0677700345# |
| H160 | 9.0199327620   | -9.0794438062   | 56.5140259276  |
| H161 | 18.2592782786# | -9.4987527756#  | 50.1505401247# |
| C162 | 17.5839752144# | -8.6559202400#  | 50.1520266901# |
| H163 | 17.2773627064# | -8.4419891426#  | 49.1387987566# |
| H164 | 23.2658115084  | -4.1702395143   | 52.4180336890  |
| H165 | 10.4819035633  | -5.4839794952   | 50.5175381505  |

|      |               |                |                |
|------|---------------|----------------|----------------|
| H166 | 14.2773876925 | -9.3762007616  | 56.3578633031  |
| H167 | 12.1793403048 | -5.1935063458  | 57.5359657273  |
| C168 | 6.7544796403  | -8.5929356148  | 55.9992340428  |
| H169 | 6.9600246583  | -8.8114842881  | 54.9444186755  |
| H170 | 6.0590447882  | -7.7499093823  | 56.0439486895  |
| N171 | 11.4867123401 | -8.1282083507  | 56.9407824704  |
| N172 | 11.3945438184 | -8.0237255726  | 58.0630835425  |
| H173 | 7.1493940556# | -5.8354099323# | 59.8218941849# |
| C174 | 6.9590147445# | -4.8009338198# | 59.5000033373# |
| H175 | 5.9039260094# | -4.4903549685# | 59.5181450083# |
| H176 | 7.4898406305  | -4.1647375238  | 60.2186561376  |
| C177 | 7.5606092248  | -4.5337163643  | 58.1211815932  |
| H178 | 8.6116928500  | -4.8522227199  | 58.1092380238  |
| H179 | 7.5466714556  | -3.4494228265  | 57.9258554438  |
| O180 | 6.8167704633  | -5.2135049221  | 57.1076708528  |
| H181 | 7.2990280798  | -5.0864520340  | 56.2685638180  |

The structure for N<sub>2</sub>H in **Figure 5**.

Energies: E= -8029.788545, solv = -0.205882, disp = -233.78 Z<sub>0</sub> = 893.47

|     |                |                |                |
|-----|----------------|----------------|----------------|
| Mo1 | 16.5287270579  | -5.6484418271  | 53.1775028577  |
| Fe2 | 9.5616540122   | -7.5278030441  | 55.2931174584  |
| Fe3 | 11.4928743107  | -5.4749166752  | 55.0532196874  |
| Fe4 | 11.2318718674  | -7.1617052489  | 52.9502880257  |
| Fe5 | 12.2396091015  | -8.4333147633  | 55.1298524344  |
| Fe6 | 14.6705057532  | -7.7189090451  | 53.9968525480  |
| Fe7 | 14.1548121311  | -5.4015944273  | 55.1108972558  |
| Fe8 | 13.4077543915  | -5.6844974744  | 52.4882815643  |
| C9  | 17.8390906338  | -2.0784182062  | 54.2749126344  |
| H10 | 18.0126062481  | -1.0598121272  | 53.9223438685  |
| H11 | 16.7560641780  | -2.2004108813  | 54.4022433293  |
| C12 | 18.3259304314  | -3.1114808685  | 53.2352905179  |
| C13 | 19.7992378270  | -2.8450305027  | 52.8518155647  |
| H14 | 20.4201088334  | -3.0489974960  | 53.7292361990  |
| H15 | 19.8981453734  | -1.7834966162  | 52.6005823227  |
| C16 | 20.2724410433  | -3.6927926288  | 51.6504941318  |
| H17 | 19.8507076154  | -3.3139394852  | 50.7181750944  |
| H18 | 19.9344932614  | -4.7253012998  | 51.7937325475  |
| C19 | 17.5310474786  | -3.1809097569  | 51.8968297239  |
| O20 | 17.1796613797  | -4.3888571026  | 51.5489461548  |
| O21 | 17.4045864876  | -2.1650591122  | 51.2153845817  |
| O22 | 18.2157310613  | -4.4105292953  | 53.8497570622  |
| C23 | 12.7729858756  | -6.6849713962  | 54.1508770717  |
| S24 | 12.7134032722  | -4.2383734062  | 56.7003539045  |
| S25 | 16.1717084705  | -6.5311060387  | 55.4799486481  |
| S26 | 9.5555453478   | -5.4678556135  | 53.8457720085  |
| S27 | 14.2420970834  | -9.7970686967  | 55.2772576266  |
| S28 | 14.7090135657  | -3.8668801580  | 53.3379023927  |
| S29 | 10.3685296675  | -9.2512286790  | 53.6190067001  |
| S30 | 15.1545907337  | -7.2009838487  | 51.7859814222  |
| S31 | 11.8146110614  | -6.2712231077  | 50.6500688156  |
| H32 | 13.6351743325# | -2.1902103580# | 49.0425560006# |
| C33 | 13.2979242146# | -2.0241176836# | 50.0550234375# |
| H34 | 13.8912285777  | -2.6708780459  | 50.7066454288  |
| H35 | 13.4679511747  | -0.9798820454  | 50.3397106473  |
| N36 | 11.8730837231  | -2.3755638735  | 50.1365415092  |
| H37 | 11.2861000143  | -2.0922311282  | 49.3650356119  |
| C38 | 11.2264911489  | -2.8575129642  | 51.2118723630  |
| N39 | 11.8141134931  | -3.0470880680  | 52.3781683276  |
| H40 | 11.3177121425  | -3.6150405400  | 53.0731312557  |
| H41 | 12.8334226013  | -2.9901103357  | 52.5278189355  |
| N42 | 9.8852281935   | -3.0991502131  | 51.1199607765  |
| H43 | 9.5346102455   | -3.3604457909  | 50.2071586835  |
| H44 | 9.4971473951   | -3.6683132883  | 51.8805299101  |
| H45 | 7.9313440546   | 0.3894970973   | 59.4127744268  |
| C46 | 8.3508434637   | -1.3530609035  | 60.6891908819  |
| H47 | 8.2269357958   | -1.5715541134  | 61.7566550806  |
| H48 | 7.5754633491   | -1.9178478455  | 60.1584186590  |
| C49 | 9.7157120432   | -1.8306904534  | 60.3003397838  |
| N50 | 10.7274949043  | -1.9071476543  | 61.2405850076  |
| C51 | 10.1936786315  | -2.2016266668  | 59.0642544436  |

|      |                |                 |                |
|------|----------------|-----------------|----------------|
| H52  | 9.7240050203   | -2.3034570105   | 58.0986444259  |
| C53  | 11.7905654806  | -2.3195847062   | 60.5759486485  |
| H54  | 12.7671895066  | -2.5137573410   | 60.9970896318  |
| N55  | 11.5233207811  | -2.5012845133   | 59.2552043920  |
| H56  | 19.2821986855  | -4.3587242780   | 57.4784193480  |
| H57  | 16.7363276145  | -8.8289920583   | 50.8069514287  |
| C58  | 18.4103026114  | -7.4216734859   | 50.5798349999  |
| H59  | 17.7983656552  | -6.5177271932   | 50.5193100997  |
| H60  | 19.2311125823  | -7.2982006217   | 49.8594042062  |
| C61  | 18.9914079975  | -7.5175561054   | 51.9526726475  |
| N62  | 18.3013531477  | -7.0757957593   | 53.0692499138  |
| C63  | 20.2012999746  | -8.0251055632   | 52.3599636298  |
| H64  | 21.0195771987  | -8.4599070886   | 51.8068550100  |
| C65  | 19.0697323541  | -7.3081674550   | 54.1223315960  |
| H66  | 18.8469276052  | -7.0490820893   | 55.1459004912  |
| N67  | 20.2259953669  | -7.8914076625   | 53.7377957908  |
| H68  | 20.9901010280  | -8.0954112016   | 54.3648576190  |
| H69  | 6.9877733464   | -10.5230526089  | 56.9143159107  |
| C70  | 6.1750555335#  | -9.8249627841#  | 56.6900008871# |
| H71  | 5.5309550371#  | -10.2322275824# | 56.0424860856# |
| H72  | 5.6932327490#  | -9.5371414456#  | 57.6127206849# |
| S73  | 7.9158214490   | -7.6519666425   | 56.9487971446  |
| H74  | 12.1493431216  | -2.8479674866   | 58.5321164998  |
| H75  | 18.4115939115  | -4.2324712443   | 54.8557008013  |
| C76  | 18.4767136909  | -2.2382124885   | 55.6854872685  |
| O77  | 18.7828001392  | -3.4442718559   | 56.0475788199  |
| O78  | 18.6113491187  | -1.2205311312   | 56.3866843718  |
| C79  | 21.7656091049  | -3.7119911984   | 51.5285196761  |
| O80  | 22.4527102203  | -3.3144059018   | 50.6079376218  |
| O81  | 22.3208169155# | -4.2658020060#  | 52.6398596224# |
| H82  | 15.7024655098# | -0.1996320228#  | 61.4912314498# |
| C83  | 14.8549939453# | -0.0829906450#  | 60.8320018725# |
| H84  | 13.9165015891# | -0.2867338797#  | 61.3260937709# |
| H85  | 14.8278226096  | 0.9916027779    | 60.5848356021  |
| C86  | 15.0599852571# | -0.8751946462#  | 59.5441990181# |
| H87  | 14.3755919610  | -0.5064509366   | 58.7697975306  |
| H88  | 14.8073367009  | -1.9288379679   | 59.7100665131  |
| C89  | 16.4992029584  | -0.8186545785   | 59.0243471492  |
| H90  | 16.9118717067  | 0.1962232114    | 59.1259632526  |
| H91  | 16.5461933853  | -1.0409686741   | 57.9522665680  |
| C92  | 17.4360319354  | -1.7964675218   | 59.7473969906  |
| O93  | 17.1052182624  | -2.4069227913   | 60.7699517027  |
| N94  | 18.6649646626  | -1.9163781282   | 59.1776778565  |
| H95  | 19.1967791008  | -2.7240168907   | 59.4806822801  |
| H96  | 18.7794311392  | -1.6436352363   | 58.1905390331  |
| C97  | 10.6519925417# | 0.0100028386#   | 53.3460013070# |
| H98  | 11.1636989364# | 0.9592720911#   | 53.2872699184# |
| H99  | 9.5863320785#  | 0.1850135178#   | 53.3579373837# |
| H100 | 10.9222558932  | -0.5842834476   | 52.4723195015  |
| C101 | 11.0707488778  | -0.6459710557   | 54.6780883974  |
| H102 | 10.7328756067  | -1.6911717834   | 54.6838110056  |
| C103 | 10.3803759901  | 0.0714461168    | 55.8481361129  |
| H104 | 9.2878783148   | -0.0057863768   | 55.7756512230  |
| H105 | 10.6408976272  | 1.1395557372    | 55.8584951433  |
| H106 | 10.6825429147  | -0.3514514952   | 56.8118693195  |
| C107 | 12.5943712798  | -0.6254814515   | 54.8614323580  |
| H108 | 13.1227544835  | -1.1125596484   | 54.0355160190  |
| H109 | 12.8904134121  | -1.1442629802   | 55.7794259337  |
| H110 | 12.9578725325  | 0.4100655791    | 54.9266925708  |
| H111 | 13.4550780674# | -12.2303883715# | 53.1883141353# |
| C112 | 13.9110014305# | -11.6210557313# | 52.4219866186# |
| H113 | 14.7424832138  | -11.0592995133  | 52.8567805745  |
| H114 | 14.2571928933  | -12.2406719187  | 51.5895294714  |
| N115 | 12.8206229136  | -10.7506118672  | 51.9781498012  |
| H116 | 12.0589521559  | -10.5490922884  | 52.6472032711  |
| C117 | 12.7870606776  | -10.0288445347  | 50.8675590289  |
| N118 | 13.9082399997  | -9.8655571382   | 50.1140185188  |
| H119 | 13.7861675257  | -9.2337623350   | 49.3297730453  |
| H120 | 14.7259024213  | -9.5899905004   | 50.6596643943  |
| N121 | 11.6066644412  | -9.5304580976   | 50.4399624843  |
| H122 | 10.8507451198  | -9.6124835282   | 51.1285043193  |
| H123 | 11.6379007610  | -8.5791602211   | 50.0594209019  |
| H124 | 19.2080261076  | -8.2185932809   | 61.7078491076  |
| C125 | 19.5978936982# | -7.2298790835#  | 61.9900505377# |
| H126 | 20.6402193088  | -7.3597449474   | 62.2992713136  |

|      |                |                |                |
|------|----------------|----------------|----------------|
| C127 | 18.8295288464  | -6.6906911381  | 63.1951778805  |
| O128 | 19.3806860806  | -6.2164076689  | 64.1859022804  |
| C129 | 19.4918713400# | -6.2717987584# | 60.7990632464# |
| H130 | 19.8623472246  | -5.2823330694  | 61.0911799163  |
| H131 | 18.4386120428  | -6.1248172211  | 60.5371552951  |
| C132 | 20.2418245996  | -6.7604338782  | 59.5451229941  |
| H133 | 19.9930205840  | -7.8077436971  | 59.3338115720  |
| H134 | 21.3275624281  | -6.7471266586  | 59.7212251052  |
| C135 | 20.0080836094  | -6.0179649940  | 58.2196885385  |
| O136 | 20.3217297285  | -6.5204008498  | 57.1511750477  |
| O137 | 19.4734111497  | -4.8070460327  | 58.3612661103  |
| N138 | 17.4752524110  | -6.7622730971  | 63.0434178278  |
| H139 | 17.1171540207  | -7.0785878588  | 62.1503675657  |
| C140 | 16.5368852913# | -6.0058845463# | 63.8530408404# |
| H141 | 15.8694784246  | -6.6958729875  | 64.3893493575  |
| H142 | 17.1223406243  | -5.4617818822  | 64.5983237950  |
| C143 | 15.6977068546  | -5.0396793877  | 62.9846245095  |
| H144 | 16.3386503440  | -4.2366641824  | 62.6049664964  |
| H145 | 14.9419574133  | -4.5751867353  | 63.6329200853  |
| C146 | 15.0286378565  | -5.7419351327  | 61.8153691648  |
| C147 | 13.9501832951  | -6.6201430055  | 62.0160831789  |
| H148 | 13.5565100741  | -6.7648644754  | 63.0212477368  |
| C149 | 15.5068944290  | -5.5577056619  | 60.5070752599  |
| H150 | 16.3112737903  | -4.8464970542  | 60.3336895595  |
| C151 | 13.3653721136  | -7.2929494493  | 60.9420508338  |
| H152 | 12.5220441624  | -7.9582105528  | 61.1088164273  |
| C153 | 14.9268700360  | -6.2372773468  | 59.4280009811  |
| H154 | 15.3068162413  | -6.0804717800  | 58.4213754396  |
| C155 | 13.8537111716  | -7.1076725120  | 59.6436959770  |
| H156 | 13.3869577483  | -7.6346208601  | 58.8159536269  |
| H157 | 9.0037560032#  | 0.7050734313#  | 60.7752692852# |
| C158 | 8.1269804386#  | 0.1560799233#  | 60.4649995411# |
| H159 | 7.2836720402#  | 0.4592420300#  | 61.0677700469# |
| H160 | 10.0222851072  | -8.2637396059  | 58.1865790999  |
| H161 | 18.2592784915# | -9.4987526048# | 50.1505401100# |
| C162 | 17.5839749424# | -8.6559205544# | 50.1520269459# |
| H163 | 17.2773626996# | -8.4419890680# | 49.1387987744# |
| H164 | 23.2850270105  | -4.2252764080  | 52.4988655158  |
| H165 | 10.7034706627  | -5.5046520663  | 50.6696187393  |
| H166 | 14.7513433485  | -9.2632933097  | 56.4084043570  |
| H167 | 12.6139704060  | -5.2114472172  | 57.6376798672  |
| C168 | 6.6940454658   | -8.5901390288  | 55.9613496909  |
| H169 | 7.1463472818   | -8.8923818341  | 55.0104852204  |
| H170 | 5.8536235990   | -7.9255684944  | 55.7232165319  |
| N171 | 11.0545328664  | -8.2695002609  | 56.6282904743  |
| N172 | 10.9720907207  | -8.5320015847  | 57.8325950151  |
| H173 | 7.1493940742#  | -5.8354099020# | 59.8218942709# |
| C174 | 6.9590146408#  | -4.8009336895# | 59.5000032469# |
| H175 | 5.9039259809#  | -4.4903550635# | 59.5181449779# |
| H176 | 7.4809284358   | -4.1808717403  | 60.2440379539  |
| C177 | 7.4747144364   | -4.4188821941  | 58.1063079740  |
| H178 | 8.4858513720   | -4.8138210881  | 57.9349953836  |
| H179 | 7.5486021313   | -3.3241373198  | 58.0612180234  |
| O180 | 6.5945562278   | -4.8005185573  | 57.0630231376  |
| H181 | 6.8789848426   | -5.7046140093  | 56.8083192255  |

The structure for the TS for formation of N<sub>2</sub>H in **Figure 6**.

Energies: E= -8029.768229, solv = -0.200267, disp = -232.62 Z<sub>0</sub> = 889.78

|     |               |               |               |
|-----|---------------|---------------|---------------|
| Mo1 | 16.3767690000 | -5.7211350000 | 53.3011880000 |
| Fe2 | 9.0111330000  | -7.1475150000 | 54.6000130000 |
| Fe3 | 11.2500700000 | -5.4546410000 | 55.0915090000 |
| Fe4 | 10.9828520000 | -7.0676470000 | 52.9987510000 |
| Fe5 | 11.8935330000 | -8.4461870000 | 55.1844830000 |
| Fe6 | 14.4608350000 | -7.7888200000 | 54.1079520000 |
| Fe7 | 13.9304020000 | -5.4958830000 | 55.2504680000 |
| Fe8 | 13.2758780000 | -5.7499410000 | 52.6083780000 |
| C9  | 17.7985160000 | -2.1161220000 | 54.3864830000 |
| H10 | 18.0004020000 | -1.1175040000 | 53.9944880000 |
| H11 | 16.7139340000 | -2.1980260000 | 54.5347130000 |
| C12 | 18.2257310000 | -3.1991500000 | 53.3747660000 |
| C13 | 19.7083200000 | -3.0182970000 | 52.9708660000 |

|     |               |                |               |
|-----|---------------|----------------|---------------|
| H14 | 20.3311430000 | -3.2050440000  | 53.8511590000 |
| H15 | 19.8472430000 | -1.9745380000  | 52.6673860000 |
| C16 | 20.1341530000 | -3.9407360000  | 51.8100720000 |
| H17 | 19.6193210000 | -3.6681950000  | 50.8875310000 |
| H18 | 19.8695260000 | -4.9734150000  | 52.0624530000 |
| C19 | 17.4108330000 | -3.2429690000  | 52.0511090000 |
| O20 | 17.0449360000 | -4.4410670000  | 51.6908710000 |
| O21 | 17.2818930000 | -2.2152230000  | 51.3887070000 |
| O22 | 18.0512650000 | -4.4770400000  | 54.0166190000 |
| C23 | 12.5682570000 | -6.7060350000  | 54.2779930000 |
| S24 | 12.4531740000 | -4.2248690000  | 56.7630930000 |
| S25 | 15.9712780000 | -6.6294430000  | 55.6018660000 |
| S26 | 9.4112150000  | -5.0634540000  | 53.6702240000 |
| S27 | 13.9227450000 | -9.9057690000  | 55.2430020000 |
| S28 | 14.5532980000 | -3.9488790000  | 53.4633570000 |
| S29 | 10.0500400000 | -9.1591130000  | 53.7305550000 |
| S30 | 15.0207580000 | -7.2913310000  | 51.9065900000 |
| S31 | 11.7536250000 | -6.3277750000  | 50.6939620000 |
| H32 | 13.6351740000 | -2.1902100000  | 49.0425560000 |
| C33 | 13.2979240000 | -2.0241170000  | 50.0550230000 |
| H34 | 13.8314530000 | -2.7248930000  | 50.7022180000 |
| H35 | 13.5311280000 | -1.0007950000  | 50.3685490000 |
| N36 | 11.8550950000 | -2.2842040000  | 50.0832990000 |
| H37 | 11.3103650000 | -1.9517730000  | 49.3010770000 |
| C38 | 11.1553360000 | -2.8030410000  | 51.1062320000 |
| N39 | 11.6908400000 | -3.0524990000  | 52.2842830000 |
| H40 | 11.1495330000 | -3.6338510000  | 52.9382590000 |
| H41 | 12.6940780000 | -2.9766850000  | 52.4941010000 |
| N42 | 9.8168500000  | -3.0171660000  | 50.9397500000 |
| H43 | 9.5179630000  | -3.2589880000  | 50.0034880000 |
| H44 | 9.3877380000  | -3.6007480000  | 51.6690070000 |
| H45 | 7.9321000000  | 0.3862130000   | 59.4118500000 |
| C46 | 8.3532590000  | -1.3544900000  | 60.6997190000 |
| H47 | 8.1436700000  | -1.5768360000  | 61.7531140000 |
| H48 | 7.6291430000  | -1.9252720000  | 60.1069590000 |
| C49 | 9.7496670000  | -1.8257570000  | 60.4264930000 |
| N50 | 10.6894530000 | -1.8571310000  | 61.4415300000 |
| C51 | 10.3191740000 | -2.2467420000  | 59.2452640000 |
| H52 | 9.9290730000  | -2.3855220000  | 58.2487250000 |
| C53 | 11.7995440000 | -2.2944720000  | 60.8769910000 |
| H54 | 12.7420090000 | -2.4685080000  | 61.3774310000 |
| N55 | 11.6293820000 | -2.5369710000  | 59.5493200000 |
| H56 | 19.2590430000 | -4.3054360000  | 57.5452120000 |
| H57 | 16.7185260000 | -8.8589480000  | 50.7799000000 |
| C58 | 18.3617170000 | -7.4222870000  | 50.6600950000 |
| H59 | 17.7278550000 | -6.5324880000  | 50.6118620000 |
| H60 | 19.2095250000 | -7.2461430000  | 49.9833770000 |
| C61 | 18.8880160000 | -7.5565550000  | 52.0566550000 |
| N62 | 18.1642300000 | -7.1390050000  | 53.1643360000 |
| C63 | 20.0901470000 | -8.0627560000  | 52.4913270000 |
| H64 | 20.9287730000 | -8.4783990000  | 51.9534910000 |
| C65 | 18.9063420000 | -7.3831610000  | 54.2331030000 |
| H66 | 18.6497950000 | -7.1419930000  | 55.2528830000 |
| N67 | 20.0772010000 | -7.9521450000  | 53.8714140000 |
| H68 | 20.8301470000 | -8.1457770000  | 54.5150080000 |
| H69 | 6.9484610000  | -10.5626770000 | 56.9348880000 |
| C70 | 6.1750540000  | -9.8249630000  | 56.6900010000 |
| H71 | 5.5309550000  | -10.2322280000 | 56.0424860000 |
| H72 | 5.6932330000  | -9.5371420000  | 57.6127210000 |
| S73 | 7.9953690000  | -7.6315450000  | 56.8101780000 |
| H74 | 12.3063480000 | -2.9014490000  | 58.8869940000 |
| H75 | 18.2550220000 | -4.3023020000  | 55.0136070000 |
| C76 | 18.4613480000 | -2.2574090000  | 55.7830010000 |
| O77 | 18.6837660000 | -3.4671170000  | 56.1866000000 |
| O78 | 18.6946090000 | -1.2263390000  | 56.4368840000 |
| C79 | 21.6090770000 | -3.8947190000  | 51.5419510000 |
| O80 | 22.1667480000 | -3.5884080000  | 50.5062780000 |
| O81 | 22.3208170000 | -4.2658020000  | 52.6398600000 |
| H82 | 15.7024660000 | -0.1996320000  | 61.4912310000 |
| C83 | 14.8549940000 | -0.0829910000  | 60.8320020000 |
| H84 | 13.9165020000 | -0.2867340000  | 61.3260940000 |
| H85 | 14.8276510000 | 0.9919930000   | 60.5858380000 |
| C86 | 15.0599850000 | -0.8751950000  | 59.5441990000 |
| H87 | 14.3708280000 | -0.5118780000  | 58.7714090000 |
| H88 | 14.8138930000 | -1.9301980000  | 59.7144200000 |

|      |               |                |               |
|------|---------------|----------------|---------------|
| C89  | 16.4957180000 | -0.8132690000  | 59.0156630000 |
| H90  | 16.8877100000 | 0.2134720000   | 59.0612170000 |
| H91  | 16.5396030000 | -1.0907080000  | 57.9560910000 |
| C92  | 17.4561480000 | -1.7346090000  | 59.7803350000 |
| O93  | 17.1245230000 | -2.3376470000  | 60.8061940000 |
| N94  | 18.7049370000 | -1.8124170000  | 59.2459130000 |
| H95  | 19.2582330000 | -2.5917880000  | 59.5824850000 |
| H96  | 18.8306570000 | -1.5713550000  | 58.2514270000 |
| C97  | 10.6519930000 | 0.0100030000   | 53.3460010000 |
| H98  | 11.1636990000 | 0.9592720000   | 53.2872700000 |
| H99  | 9.5863320000  | 0.1850130000   | 53.3579370000 |
| H100 | 10.9229190000 | -0.5845370000  | 52.4722780000 |
| C101 | 11.0621770000 | -0.6585270000  | 54.6757900000 |
| H102 | 10.7143810000 | -1.7003590000  | 54.6698600000 |
| C103 | 10.3738270000 | 0.0527670000   | 55.8521110000 |
| H104 | 9.2806020000  | 0.0121600000   | 55.7599510000 |
| H105 | 10.6670770000 | 1.1117470000   | 55.8942600000 |
| H106 | 10.6459530000 | -0.4033040000  | 56.8105860000 |
| C107 | 12.5849740000 | -0.6548560000  | 54.8679710000 |
| H108 | 13.1105310000 | -1.1796960000  | 54.0638770000 |
| H109 | 12.8653160000 | -1.1509620000  | 55.8037260000 |
| H110 | 12.9665160000 | 0.3758160000   | 54.9041590000 |
| H111 | 13.4550780000 | -12.2303880000 | 53.1883140000 |
| C112 | 13.9110020000 | -11.6210560000 | 52.4219870000 |
| H113 | 14.7808020000 | -11.0997150000 | 52.8270900000 |
| H114 | 14.1783340000 | -12.2165810000 | 51.5443960000 |
| N115 | 12.8108690000 | -10.7049480000 | 52.0866240000 |
| H116 | 12.0869630000 | -10.5633820000 | 52.7950840000 |
| C117 | 12.6501250000 | -10.0016900000 | 50.9724010000 |
| N118 | 13.7024530000 | -9.8140290000  | 50.1290960000 |
| H119 | 13.4861610000 | -9.2100230000  | 49.3430310000 |
| H120 | 14.5382690000 | -9.4720630000  | 50.6122950000 |
| N121 | 11.4249790000 | -9.5479810000  | 50.6433250000 |
| H122 | 10.7310660000 | -9.6285320000  | 51.3982540000 |
| H123 | 11.4073400000 | -8.5979290000  | 50.2531140000 |
| H124 | 19.2165320000 | -8.2201710000  | 61.7010510000 |
| C125 | 19.5978940000 | -7.2298790000  | 61.9900500000 |
| H126 | 20.6387200000 | -7.3547750000  | 62.3059720000 |
| C127 | 18.8192700000 | -6.7069430000  | 63.1921690000 |
| O128 | 19.3635180000 | -6.2853090000  | 64.2096650000 |
| C129 | 19.4918720000 | -6.2717980000  | 60.7990630000 |
| H130 | 19.8227400000 | -5.2718940000  | 61.1021470000 |
| H131 | 18.4407260000 | -6.1558270000  | 60.5133050000 |
| C132 | 20.2795730000 | -6.7267750000  | 59.5591340000 |
| H133 | 20.0915330000 | -7.7860130000  | 59.3472340000 |
| H134 | 21.3612020000 | -6.6455790000  | 59.7431730000 |
| C135 | 19.9924110000 | -5.9874910000  | 58.2444060000 |
| O136 | 20.2339350000 | -6.5015120000  | 57.1631530000 |
| O137 | 19.4962380000 | -4.7662380000  | 58.4166610000 |
| N138 | 17.4661710000 | -6.7364700000  | 63.0137290000 |
| H139 | 17.1128670000 | -7.0098260000  | 62.1050600000 |
| C140 | 16.5368850000 | -6.0058840000  | 63.8530410000 |
| H141 | 15.8457460000 | -6.7099720000  | 64.3390230000 |
| H142 | 17.1296300000 | -5.5272590000  | 64.6366230000 |
| C143 | 15.7221360000 | -4.9623480000  | 63.0533220000 |
| H144 | 16.3865800000 | -4.1694340000  | 62.6926470000 |
| H145 | 15.0077830000 | -4.4998390000  | 63.7484830000 |
| C146 | 14.9870620000 | -5.5824470000  | 61.8789250000 |
| C147 | 13.8647970000 | -6.4025420000  | 62.0777230000 |
| H148 | 13.4762600000 | -6.5446810000  | 63.0853170000 |
| C149 | 15.4567020000 | -5.3970600000  | 60.5684550000 |
| H150 | 16.2939570000 | -4.7245360000  | 60.3975250000 |
| C151 | 13.2371380000 | -7.0307460000  | 61.0008640000 |
| H152 | 12.3633530000 | -7.6555950000  | 61.1702570000 |
| C153 | 14.8366320000 | -6.0334030000  | 59.4871460000 |
| H154 | 15.2131050000 | -5.8859710000  | 58.4779850000 |
| C155 | 13.7277690000 | -6.8562100000  | 59.7027830000 |
| H156 | 13.2462330000 | -7.3528650000  | 58.8641770000 |
| H157 | 9.0037560000  | 0.7050740000   | 60.7752690000 |
| C158 | 8.1269810000  | 0.1560800000   | 60.4650000000 |
| H159 | 7.2836720000  | 0.4592420000   | 61.0677700000 |
| H160 | 9.2352680000  | -8.5779870000  | 57.3855010000 |
| H161 | 18.2592780000 | -9.4987530000  | 50.1505400000 |
| C162 | 17.5839750000 | -8.6559200000  | 50.1520270000 |
| H163 | 17.2773630000 | -8.4419890000  | 49.1387990000 |

|      |               |               |               |
|------|---------------|---------------|---------------|
| H164 | 23.2571380000 | -4.1964410000 | 52.3758590000 |
| H165 | 10.6665590000 | -5.5264080000 | 50.6571820000 |
| H166 | 14.3358180000 | -9.5317790000 | 56.4722770000 |
| H167 | 12.2644430000 | -5.1643350000 | 57.7217050000 |
| C168 | 6.7744270000  | -8.6627600000 | 55.9141060000 |
| H169 | 7.2435140000  | -9.0616760000 | 55.0056180000 |
| H170 | 5.9766350000  | -7.9797430000 | 55.5977460000 |
| N171 | 11.2295400000 | -8.7240460000 | 56.9461410000 |
| N172 | 10.4273470000 | -8.8773510000 | 57.7833510000 |
| H173 | 7.1493940000  | -5.8354100000 | 59.8218940000 |
| C174 | 6.9590150000  | -4.8009340000 | 59.5000030000 |
| H175 | 5.9039260000  | -4.4903550000 | 59.5181450000 |
| H176 | 7.4863440000  | -4.1791150000 | 60.2375780000 |
| C177 | 7.4606410000  | -4.4291300000 | 58.1010290000 |
| H178 | 8.4593490000  | -4.8420920000 | 57.9060860000 |
| H179 | 7.5479880000  | -3.3370510000 | 58.0425290000 |
| O180 | 6.5458350000  | -4.8010610000 | 57.0779610000 |
| H181 | 6.7989330000  | -5.7068170000 | 56.8244260000 |

The structure of N<sub>2</sub>H<sub>2</sub> in **Figure 7**.

Energies: E= -8029.807469, solv = -0.208632, disp = -238.61 Z<sub>0</sub> = 896.06

|     |                |                |                |
|-----|----------------|----------------|----------------|
| Mo1 | 16.5663093406  | -5.7480392576  | 53.2466704532  |
| Fe2 | 9.4148664771   | -6.9517217537  | 55.4254427764  |
| Fe3 | 11.6940324201  | -5.2991483036  | 55.6093294239  |
| Fe4 | 11.2070043822  | -6.7959480293  | 53.3136331463  |
| Fe5 | 12.2103536681  | -8.2685367550  | 55.3526792359  |
| Fe6 | 14.6804952081  | -7.8641118857  | 54.2864523601  |
| Fe7 | 14.3481253068  | -5.4120726513  | 55.2194799945  |
| Fe8 | 13.5236752013  | -5.7747065622  | 52.6363634529  |
| C9  | 17.8328289412  | -2.1394209024  | 54.2412700068  |
| H10 | 17.9935443457  | -1.1250056956  | 53.8707505645  |
| H11 | 16.7524661602  | -2.2695127877  | 54.3788543447  |
| C12 | 18.3244962226  | -3.1839931472  | 53.2133465517  |
| C13 | 19.7863586735  | -2.8910041940  | 52.8077660614  |
| H14 | 20.4202312950  | -3.0597775095  | 53.6831494981  |
| H15 | 19.8563336911  | -1.8333420214  | 52.5320352605  |
| C16 | 20.2710666846  | -3.7535518852  | 51.6223794732  |
| H17 | 19.8469798532  | -3.3972271862  | 50.6823075906  |
| H18 | 19.9450216733  | -4.7873112020  | 51.7833666692  |
| C19 | 17.5141892258  | -3.2986471006  | 51.8850717955  |
| O20 | 17.1824941688  | -4.5202526551  | 51.5673066994  |
| O21 | 17.3595239392  | -2.2997015432  | 51.1835558089  |
| O22 | 18.2528228909  | -4.4747828627  | 53.8506012481  |
| C23 | 12.8340475055  | -6.5945059115  | 54.4162474366  |
| S24 | 13.3139512312  | -3.9941395325  | 56.8640453848  |
| S25 | 16.3086700091  | -6.6061272258  | 55.5668191674  |
| S26 | 9.7788661941   | -4.9275225900  | 54.1698392965  |
| S27 | 13.8662250310  | -9.7641227742  | 55.3698010036  |
| S28 | 14.7719287447  | -3.9238865247  | 53.3822587967  |
| S29 | 10.2409575976  | -8.8399740697  | 54.0484892342  |
| S30 | 15.1439870397  | -7.4156850329  | 52.0154488575  |
| S31 | 11.7856634722  | -6.2432846531  | 50.8804021264  |
| H32 | 13.6351742119# | -2.1902104574# | 49.0425559768# |
| C33 | 13.2979244212# | -2.0241175138# | 50.0550234611# |
| H34 | 13.8983993023  | -2.6734435672  | 50.6975078804  |
| H35 | 13.4790006656  | -0.9813951574  | 50.3401329745  |
| N36 | 11.8780898138  | -2.3693106395  | 50.1610258741  |
| H37 | 11.2687264738  | -2.0422744109  | 49.4247739803  |
| C38 | 11.2617700373  | -2.8025695329  | 51.2765296484  |
| N39 | 11.8933083311  | -3.0074649764  | 52.4142868946  |
| H40 | 11.3905655715  | -3.5235687742  | 53.1485283969  |
| H41 | 12.9174677171  | -2.9911669929  | 52.5227380338  |
| N42 | 9.9073165784   | -2.9815964908  | 51.2457263999  |
| H43 | 9.5012541270   | -3.2440471030  | 50.3568397784  |
| H44 | 9.5240788009   | -3.4943219901  | 52.0475320327  |
| H45 | 7.9298855270   | 0.3931753930   | 59.4137431949  |
| C46 | 8.3356512060   | -1.3538025222  | 60.6818379100  |
| H47 | 8.2652927974   | -1.5706417679  | 61.7544694120  |
| H48 | 7.5218211845   | -1.9030603754  | 60.1931051735  |
| C49 | 9.6680955710   | -1.8482240169  | 60.2155046620  |
| N50 | 10.7218839534  | -1.9733485472  | 61.1009459186  |



|      |                |                 |                |
|------|----------------|-----------------|----------------|
| C51  | 10.0802807376  | -2.1748488399   | 58.9432437541  |
| H52  | 9.5631273707   | -2.2210349218   | 57.9975261116  |
| C53  | 11.7456662811  | -2.3726498577   | 60.3689847491  |
| H54  | 12.7408818310  | -2.5862790643   | 60.7332115991  |
| N55  | 11.4117913114  | -2.5021181270   | 59.0572247816  |
| H56  | 19.2692877058  | -4.3602618586   | 57.4731429562  |
| H57  | 16.7332866612  | -8.8352930126   | 50.8018087748  |
| C58  | 18.4054588954  | -7.4211152873   | 50.5853829101  |
| H59  | 17.7864327608  | -6.5207291514   | 50.5535112074  |
| H60  | 19.2111949367  | -7.2756844826   | 49.8518534785  |
| C61  | 19.0202600148  | -7.5360718313   | 51.9431555500  |
| N62  | 18.3487201015  | -7.1437673588   | 53.0903230947  |
| C63  | 20.2545547334  | -8.0170802508   | 52.3061401394  |
| H64  | 21.0693130199  | -8.4144023517   | 51.7206698157  |
| C65  | 19.1518860944  | -7.3781074607   | 54.1169805192  |
| H66  | 18.9493383784  | -7.1462769626   | 55.1514297013  |
| N67  | 20.3131265950  | -7.9176381312   | 53.6862270551  |
| H68  | 21.1010649541  | -8.1151159174   | 54.2848524863  |
| H69  | 6.9596949203   | -10.5511952445  | 56.9300262444  |
| C70  | 6.1750544029#  | -9.8249633580#  | 56.6900008241# |
| H71  | 5.5309554274#  | -10.2322282114# | 56.0424860931# |
| H72  | 5.6932325379#  | -9.5371412374#  | 57.6127205097# |
| S73  | 8.0421059581   | -7.8278656733   | 57.0800367612  |
| H74  | 12.0143761366  | -2.8207768562   | 58.2970206605  |
| H75  | 18.4635352425  | -4.2839770693   | 54.8505192107  |
| C76  | 18.4780827375  | -2.2676481850   | 55.6515091243  |
| O77  | 18.8035507653  | -3.4630134106   | 56.0305379939  |
| O78  | 18.5994915137  | -1.2374540633   | 56.3375759056  |
| C79  | 21.7647776218  | -3.7593628001   | 51.5062720356  |
| O80  | 22.4520286075  | -3.3883226188   | 50.5741950882  |
| O81  | 22.3208171359# | -4.2658019841#  | 52.6398596058# |
| H82  | 15.7024655250# | -0.1996319952#  | 61.4912314353# |
| C83  | 14.8549937912# | -0.0829907297#  | 60.8320019002# |
| H84  | 13.9165015893# | -0.2867338795#  | 61.3260937710# |
| H85  | 14.8268590480  | 0.9915611177    | 60.5842967544  |
| C86  | 15.0599854257# | -0.8751945445#  | 59.5441990499# |
| H87  | 14.3642136115  | -0.5186014910   | 58.7744488877  |
| H88  | 14.8227584652  | -1.9319102071   | 59.7120087971  |
| C89  | 16.4939795088  | -0.8000533575   | 59.0109051634  |
| H90  | 16.8921756398  | 0.2214948080    | 59.1044552339  |
| H91  | 16.5337237116  | -1.0282580307   | 57.9397516811  |
| C92  | 17.4510289465  | -1.7594201881   | 59.7312719944  |
| O93  | 17.1437498078  | -2.3539325027   | 60.7713978166  |
| N94  | 18.6689788376  | -1.8835020798   | 59.1406152997  |
| H95  | 19.2126393136  | -2.6801703414   | 59.4519085762  |
| H96  | 18.7685572088  | -1.6285770871   | 58.1464800412  |
| C97  | 10.6519926765# | 0.0100029249#   | 53.3460013947# |
| H98  | 11.1636988630# | 0.9592721235#   | 53.2872698036# |
| H99  | 9.5863320648#  | 0.1850134315#   | 53.3579374282# |
| H100 | 10.9246007901  | -0.5873207308   | 52.4762778479  |
| C101 | 11.0735460556  | -0.6279509657   | 54.6856616703  |
| H102 | 10.7387292819  | -1.6737609484   | 54.7082248539  |
| C103 | 10.3810074750  | 0.1088649325    | 55.8425295594  |
| H104 | 9.2885980019   | 0.0289381030    | 55.7696762084  |
| H105 | 10.6394113981  | 1.1775448243    | 55.8341323449  |
| H106 | 10.6822320353  | -0.2956437878   | 56.8143731995  |
| C107 | 12.5971571469  | -0.5950836054   | 54.8674742948  |
| H108 | 13.1248354466  | -1.1018829939   | 54.0532766454  |
| H109 | 12.8984285348  | -1.0874168107   | 55.7980717723  |
| H110 | 12.9563783353  | 0.4435123740    | 54.9043265659  |
| H111 | 13.4550779241# | -12.2303883845# | 53.1883140395# |
| C112 | 13.9110016795# | -11.6210556879# | 52.4219867720# |
| H113 | 14.8128723926  | -11.1445665759  | 52.8128000622  |
| H114 | 14.1128643026  | -12.1917921808  | 51.5122560143  |
| N115 | 12.8352963455  | -10.6514625566  | 52.1755762552  |
| H116 | 12.2576366565  | -10.4209217688  | 52.9878017833  |
| C117 | 12.6126200778  | -9.9366002044   | 51.0838478283  |
| N118 | 13.6003867098  | -9.7805951298   | 50.1578733880  |
| H119 | 13.3386465184  | -9.1826927376   | 49.3812438711  |
| H120 | 14.4758187076  | -9.4579727859   | 50.5810556352  |
| N121 | 11.3804652988  | -9.4351103076   | 50.8569187276  |
| H122 | 10.7360760689  | -9.5137816005   | 51.6509198920  |
| H123 | 11.3536804313  | -8.4854632803   | 50.4691005731  |
| H124 | 19.1943342657  | -8.2146554450   | 61.7143140919  |
| C125 | 19.5978935100# | -7.2298793236#  | 61.9900503808# |

|      |                |                |                |
|------|----------------|----------------|----------------|
| H126 | 20.6412391703  | -7.3696898574  | 62.2916413635  |
| C127 | 18.8422164788  | -6.6705592332  | 63.1950979219  |
| O128 | 19.3989332221  | -6.1564886488  | 64.1622054430  |
| C129 | 19.4918715968# | -6.2717984572# | 60.7990633320# |
| H130 | 19.8804248345  | -5.2881390626  | 61.0875211311  |
| H131 | 18.4382699544  | -6.1113096983  | 60.5495133303  |
| C132 | 20.2202621713  | -6.7712605973  | 59.5372693015  |
| H133 | 19.9324641160  | -7.8068309382  | 59.3162177195  |
| H134 | 21.3062328349  | -6.8008622167  | 59.7087049521  |
| C135 | 20.0125120200  | -6.0087884264  | 58.2176466929  |
| O136 | 20.3740654594  | -6.4851007892  | 57.1528628334  |
| O137 | 19.4412255952  | -4.8141156971  | 58.3580581921  |
| N138 | 17.4868024003  | -6.7693607655  | 63.0635306644  |
| H139 | 17.1297969692  | -7.1217520922  | 62.1841314147  |
| C140 | 16.5368852110# | -6.0058844986# | 63.8530407246# |
| H141 | 15.8804542600  | -6.6951481673  | 64.4036926203  |
| H142 | 17.1121581311  | -5.4372794492  | 64.5879064701  |
| C143 | 15.6765562267  | -5.0686098721  | 62.9653282286  |
| H144 | 16.2793964220  | -4.2137938525  | 62.6408341171  |
| H145 | 14.8584409868  | -4.6755165385  | 63.5842012544  |
| C146 | 15.1301446471  | -5.7812615964  | 61.7393223069  |
| C147 | 14.1524986872  | -6.7847823538  | 61.8455668285  |
| H148 | 13.7097571696  | -7.0048946141  | 62.8159247874  |
| C149 | 15.6712785850  | -5.5063559289  | 60.4716421650  |
| H150 | 16.3998024986  | -4.7051074458  | 60.3713315626  |
| C151 | 13.7458726666  | -7.5096327761  | 60.7216177928  |
| H152 | 12.9950189895  | -8.2900491765  | 60.8281752497  |
| C153 | 15.2709680473  | -6.2351413818  | 59.3459015766  |
| H154 | 15.7084764026  | -6.0262792998  | 58.3731476410  |
| C155 | 14.3131709313  | -7.2470596468  | 59.4688763488  |
| H156 | 14.0271021448  | -7.8234804364  | 58.5928149492  |
| H157 | 9.0037559687#  | 0.7050734955#  | 60.7752692697# |
| C158 | 8.1269805825#  | 0.1560800741#  | 60.4649995132# |
| H159 | 7.2836720237#  | 0.4592419581#  | 61.0677700596# |
| H160 | 10.5718854507  | -6.1400231969  | 58.0398055671  |
| H161 | 18.2592784113# | -9.4987526692# | 50.1505401233# |
| C162 | 17.5839749970# | -8.6559203801# | 50.1520269010# |
| H163 | 17.2773627272# | -8.4419890734# | 49.1387987650# |
| H164 | 23.2852174382  | -4.2223160995  | 52.5009220222  |
| H165 | 10.7706798665  | -5.3547849358  | 50.8780869944  |
| H166 | 11.5866511697  | -8.0488253120  | 58.0731366646  |
| H167 | 13.3911078083  | -4.8422616132  | 57.9165260480  |
| C168 | 6.7769869643   | -8.6062452096  | 56.0110490767  |
| H169 | 7.2463530129   | -8.9039637702  | 55.0668543903  |
| H170 | 5.9877155160   | -7.8799535578  | 55.7765272331  |
| N171 | 11.5044296317  | -7.6450097503  | 57.1376027595  |
| N172 | 10.8820135627  | -6.4544072111  | 57.1163139114  |
| H173 | 7.1493940675#  | -5.8354099124# | 59.8218942418# |
| C174 | 6.9590150104#  | -4.8009332995# | 59.5000036690# |
| H175 | 5.9039259981#  | -4.4903550046# | 59.5181449709# |
| H176 | 7.4950546431   | -4.1654202847  | 60.2191734539  |
| C177 | 7.4484201820   | -4.4724442203  | 58.0860669195  |
| H178 | 8.4932620819   | -4.7847458895  | 57.9446263934  |
| H179 | 7.4227813727   | -3.3834147458  | 57.9526544649  |
| O180 | 6.6174165546   | -5.0190598537  | 57.0786361976  |
| H181 | 6.9404942723   | -5.9415047205  | 56.9634578497  |

The structure of the reactant with two water.

Energies: E=-8182.639843, solv = -0.209678, disp= 242.53, Z<sub>0</sub> = 925.12

|     |               |               |               |
|-----|---------------|---------------|---------------|
| Mo1 | 16.6578216559 | -5.2711516497 | 53.0753841506 |
| Fe2 | 9.5809669492  | -7.2319310951 | 55.2157569591 |
| Fe3 | 11.6848824330 | -5.3824372312 | 55.4019727481 |
| Fe4 | 11.3716466974 | -6.8545789614 | 52.9771309216 |
| Fe5 | 12.5741047766 | -8.2195608510 | 55.0300157298 |
| Fe6 | 14.8987677638 | -7.3536100981 | 53.9140479083 |
| Fe7 | 14.3991619257 | -5.1060569928 | 55.1041121525 |
| Fe8 | 13.6759957209 | -5.4214493104 | 52.6360398515 |
| C9  | 18.0053451383 | -1.7844065024 | 54.3437632205 |
| H10 | 18.2038365917 | -0.7507386590 | 54.0539860221 |
| H11 | 16.9188940542 | -1.8905807796 | 54.4571595144 |
| C12 | 18.4797353598 | -2.7673517343 | 53.2493285524 |
| C13 | 19.9611202972 | -2.5105485169 | 52.8898141460 |

|     |                |                 |                |
|-----|----------------|-----------------|----------------|
| H14 | 20.5665243722  | -2.7769990200   | 53.7617385619  |
| H15 | 20.0889248606  | -1.4402650414   | 52.6976169285  |
| C16 | 20.4249551408  | -3.3068386668   | 51.6475378149  |
| H17 | 20.0989543130  | -2.8125171028   | 50.7310335341  |
| H18 | 19.9785093195  | -4.3062222351   | 51.6850992600  |
| C19 | 17.6850817036  | -2.7623020321   | 51.9069290896  |
| O20 | 17.2917805957  | -3.9452724048   | 51.5131861913  |
| O21 | 17.5914601929  | -1.7207206508   | 51.2620861748  |
| O22 | 18.3490578989  | -4.0920789209   | 53.7980555444  |
| C23 | 12.9610022354  | -6.4029757127   | 54.2178844459  |
| S24 | 13.1125053984  | -3.9612429092   | 56.8226627618  |
| S25 | 16.4114675756  | -6.2162466905   | 55.3650700267  |
| S26 | 9.7382244798   | -5.1627313260   | 54.0131909796  |
| S27 | 14.5898878358  | -9.5849708733   | 54.9425153378  |
| S28 | 14.8312605967  | -3.4876603921   | 53.3630788213  |
| S29 | 10.4764390145  | -8.9498899793   | 53.7219461464  |
| S30 | 15.3268471545  | -6.8209075118   | 51.6609288834  |
| S31 | 11.9848275078  | -6.0688838127   | 50.7012002500  |
| H32 | 13.6351742682# | -2.1902104965#  | 49.0425560021# |
| C33 | 13.2979242878# | -2.0241175178#  | 50.0550234980# |
| H34 | 13.8574800589  | -2.7058474867   | 50.7001319986  |
| H35 | 13.5213616771  | -0.9942046727   | 50.3551805211  |
| N36 | 11.8607563835  | -2.3057501143   | 50.1369835284  |
| H37 | 11.2782640774  | -1.9771842050   | 49.3801379296  |
| C38 | 11.2079209034  | -2.7751672022   | 51.2138576453  |
| N39 | 11.7882496509  | -2.9765384477   | 52.3786875268  |
| H40 | 11.2878063809  | -3.5567576296   | 53.0640942601  |
| H41 | 12.8044755521  | -2.8996752981   | 52.5321003685  |
| N42 | 9.8581580305   | -2.9873500425   | 51.1141354245  |
| H43 | 9.5246693830   | -3.3000639054   | 50.2107841697  |
| H44 | 9.4569953695   | -3.5161830008   | 51.8935499579  |
| H45 | 7.9325520585   | 0.3810724355    | 59.4110396270  |
| C46 | 8.3275019849   | -1.3523154916   | 60.7097562809  |
| H47 | 8.2155205306   | -1.5517403439   | 61.7822940323  |
| H48 | 7.5309362758   | -1.9079414889   | 60.2000968654  |
| C49 | 9.6745464777   | -1.8592644117   | 60.3059059774  |
| N50 | 10.6905065379  | -1.9794078491   | 61.2354476986  |
| C51 | 10.1344365178  | -2.2068828764   | 59.0564406934  |
| H52 | 9.6549993432   | -2.2652882150   | 58.0915499210  |
| C53 | 11.7396390142  | -2.3973354389   | 60.5507550439  |
| H54 | 12.7164168434  | -2.6200142155   | 60.9578067192  |
| N55 | 11.4566366480  | -2.5423431227   | 59.2294943191  |
| H56 | 19.3585225335  | -4.2983398779   | 57.4918990267  |
| H57 | 16.7461156054  | -8.8008624944   | 50.8265453052  |
| C58 | 18.4240586471  | -7.4046785106   | 50.5171686968  |
| H59 | 17.8132296727  | -6.5058748163   | 50.4055781010  |
| H60 | 19.2345812223  | -7.3313375164   | 49.7778769780  |
| C61 | 19.0254427091  | -7.4028605153   | 51.8845732467  |
| N62 | 18.4561332171  | -6.7151998265   | 52.9448045539  |
| C63 | 20.1719963996  | -8.0180871318   | 52.3257372153  |
| H64 | 20.8971160673  | -8.6335357556   | 51.8160249694  |
| C65 | 19.2382504091  | -6.9095800247   | 53.9973138618  |
| H66 | 19.0980748172  | -6.5142915475   | 54.9907455291  |
| N67 | 20.2832130676  | -7.6969211517   | 53.6668057671  |
| H68 | 21.0182725716  | -7.9555452365   | 54.3080607226  |
| H69 | 6.9357268503   | -10.5751531843  | 56.9374999191  |
| C70 | 6.1750550015#  | -9.8249632122#  | 56.6900010349# |
| H71 | 5.5309554297#  | -10.2322280462# | 56.0424859867# |
| H72 | 5.6932323806#  | -9.5371412703#  | 57.6127204378# |
| S73 | 8.2809464172   | -8.0253814216   | 56.9685978529  |
| H74 | 12.0804659411  | -2.8613669007   | 58.4883315170  |
| H75 | 18.5476371626  | -3.9710929924   | 54.8200123384  |
| C76 | 18.6278419037  | -2.0408928244   | 55.7490513592  |
| O77 | 18.9026716248  | -3.2740951029   | 56.0438161840  |
| O78 | 18.7790864062  | -1.0703350937   | 56.5095961909  |
| C79 | 21.9143649154  | -3.4685275150   | 51.6143461567  |
| O80 | 22.7101924277  | -2.9907874124   | 50.8296623743  |
| O81 | 22.3208169811# | -4.2658019569#  | 52.6398596002# |
| H82 | 15.7024655411# | -0.1996319657#  | 61.4912314196# |
| C83 | 14.8549938557# | -0.0829907525#  | 60.8320019245# |
| H84 | 13.9165015893# | -0.2867338795#  | 61.3260937710# |
| H85 | 14.8290324677  | 0.9920186360    | 60.5864443157  |
| C86 | 15.0599853666# | -0.8751945622#  | 59.5441989904# |
| H87 | 14.3890209674  | -0.4954939783   | 58.7637611062  |
| H88 | 14.7890309355  | -1.9249254552   | 59.7037552199  |

|      |                |                 |                |
|------|----------------|-----------------|----------------|
| C89  | 16.5031024529  | -0.8419998846   | 59.0363043277  |
| H90  | 16.9277863544  | 0.1693742574    | 59.1184816641  |
| H91  | 16.5520329162  | -1.0864436886   | 57.9689672367  |
| C92  | 17.4261451748  | -1.8189996238   | 59.7777249138  |
| O93  | 17.0620269549  | -2.4674287423   | 60.7647873215  |
| N94  | 18.6840038895  | -1.8967589074   | 59.2649052818  |
| H95  | 19.2140071902  | -2.7074063332   | 59.5624669335  |
| H96  | 18.8441358290  | -1.5833077284   | 58.2965418839  |
| C97  | 10.6519927169# | 0.0100028348#   | 53.3460013160# |
| H98  | 11.1636988471# | 0.9592721347#   | 53.2872698475# |
| H99  | 9.5863320724#  | 0.1850134768#   | 53.3579374361# |
| H100 | 10.9256149468  | -0.5853263175   | 52.4757690214  |
| C101 | 11.0723839906  | -0.6324646982   | 54.6840160596  |
| H102 | 10.7709425023  | -1.6886797121   | 54.6858647733  |
| C103 | 10.3410757795  | 0.0616075163    | 55.8435082004  |
| H104 | 9.2528349817   | -0.0536620906   | 55.7560239915  |
| H105 | 10.5634666265  | 1.1383109133    | 55.8558526242  |
| H106 | 10.6450167756  | -0.3490795195   | 56.8121820058  |
| C107 | 12.5913314901  | -0.5547421462   | 54.8865171208  |
| H108 | 13.1472972375  | -1.0244230331   | 54.0689340577  |
| H109 | 12.8975109052  | -1.0588459458   | 55.8090147120  |
| H110 | 12.9137421568  | 0.4945516587    | 54.9516550429  |
| H111 | 13.4550781473# | -12.2303882858# | 53.1883142507# |
| C112 | 13.9110013104# | -11.6210558142# | 52.4219864809# |
| H113 | 14.7773029320  | -11.1099126361  | 52.8475560378  |
| H114 | 14.2029400053  | -12.2458209422  | 51.5710970185  |
| N115 | 12.8497220429  | -10.6998463699  | 52.0153253701  |
| H116 | 12.1003423773  | -10.4977861486  | 52.6895864147  |
| C117 | 12.8808665077  | -9.8903404298   | 50.9610754706  |
| N118 | 14.0220186797  | -9.7400317933   | 50.2408840642  |
| H119 | 14.0032590797  | -8.9756919818   | 49.5735867384  |
| H120 | 14.8699161991  | -9.7011848091   | 50.7989598009  |
| N121 | 11.7436825331  | -9.2957744420   | 50.5517822423  |
| H122 | 10.9745217815  | -9.3605506389   | 51.2258405584  |
| H123 | 11.8320297115  | -8.3291244463   | 50.2104488412  |
| H124 | 19.2328863548  | -8.2255187848   | 61.6978416670  |
| C125 | 19.5978935435# | -7.2298792579#  | 61.9900504987# |
| H126 | 20.6379535540  | -7.3428617584   | 62.3131780086  |
| C127 | 18.8084444927  | -6.7273458057   | 63.1944295967  |
| O128 | 19.3417158675  | -6.3731872403   | 64.2442896406  |
| C129 | 19.4918715082# | -6.2717985410#  | 60.7990633049# |
| H130 | 19.8190764921  | -5.2709280911   | 61.1039555699  |
| H131 | 18.4420771454  | -6.1567961026   | 60.5084562594  |
| C132 | 20.2857727663  | -6.7207264834   | 59.5558538026  |
| H133 | 20.0864910305  | -7.7756640659   | 59.3327195115  |
| H134 | 21.3660636347  | -6.6601803753   | 59.7552501307  |
| C135 | 20.0475348852  | -5.9786240905   | 58.2285391798  |
| O136 | 20.3470002301  | -6.4872032058   | 57.1593743634  |
| O137 | 19.5332838027  | -4.7570597625   | 58.3700446042  |
| N138 | 17.4631813750  | -6.6969917700   | 62.9809898103  |
| H139 | 17.1125013410  | -6.9364553170   | 62.0616932640  |
| C140 | 16.5368851203# | -6.0058846251#  | 63.8530404166# |
| H141 | 15.8676293828  | -6.7306852604   | 64.3397920124  |
| H142 | 17.1339506328  | -5.5304390267   | 64.6356297064  |
| C143 | 15.6884460522  | -4.9638435770   | 63.0882706430  |
| H144 | 16.3368632275  | -4.1731239316   | 62.6955211733  |
| H145 | 15.0001765657  | -4.5005815516   | 63.8079139346  |
| C146 | 14.9155251195  | -5.6043344210   | 61.9532903855  |
| C147 | 13.7580330138  | -6.3579599073   | 62.2037798490  |
| H148 | 13.3637584461  | -6.4130031962   | 63.2173327232  |
| C149 | 15.3992059139  | -5.5296823092   | 60.6360884080  |
| H150 | 16.2583245934  | -4.8979605066   | 60.4228386507  |
| C151 | 13.1057722267  | -7.0307802477   | 61.1692910336  |
| H152 | 12.2067698312  | -7.6058577450   | 61.3776825667  |
| C153 | 14.7625753482  | -6.2246298910   | 59.6023488572  |
| H154 | 15.1688713662  | -6.1919141298   | 58.5954194183  |
| C155 | 13.6147438558  | -6.9771650729   | 59.8683622268  |
| H156 | 13.1318977983  | -7.5262261142   | 59.0670112182  |
| H157 | 9.0037559686#  | 0.7050735180#   | 60.7752692304# |
| C158 | 8.1269805500#  | 0.1560800299#   | 60.4649995645# |
| H159 | 7.2836720285#  | 0.4592419800#   | 61.0677700553# |
| H160 | 10.9056528716  | -6.6219726077   | 57.9579776464  |
| H161 | 18.2592785842# | -9.4987525305#  | 50.1505400606# |
| C162 | 17.5839749693# | -8.6559204856#  | 50.1520272309# |
| H163 | 17.2773626316# | -8.4419890790#  | 49.1387987928# |

|      |               |                |                |
|------|---------------|----------------|----------------|
| H164 | 23.2935001408 | -4.2989887519  | 52.5768836499  |
| H165 | 10.8038707898 | -5.4137028256  | 50.6202590143  |
| H166 | 15.0687726129 | -9.3154631097  | 56.1965327973  |
| H167 | 13.3271723435 | -4.8557524449  | 57.8145899618  |
| C168 | 6.8367036026  | -8.6346013207  | 56.0063928062  |
| H169 | 7.1849024801  | -8.9368563530  | 55.0122801031  |
| H170 | 6.1112200181  | -7.8231007536  | 55.8697469074  |
| N171 | 11.8393540257 | -7.8751741576  | 56.8156456930  |
| N172 | 11.2194374819 | -6.7928351595  | 56.9823508174  |
| H173 | 7.1493939976# | -5.8354099045# | 59.8218943085# |
| C174 | 6.9590150824# | -4.8009333946# | 59.5000036940# |
| H175 | 5.9039260003# | -4.4903549913# | 59.5181448624# |
| H176 | 7.5027250719  | -4.1569425719  | 60.2042722989  |
| C177 | 7.4716104327  | -4.5422575696  | 58.0799013537  |
| H178 | 8.5365382030  | -4.8039967418  | 57.9993895515  |
| H179 | 7.3901247479  | -3.4691054557  | 57.8592291284  |
| O180 | 6.7114117285  | -5.2248944607  | 57.0979848420  |
| H181 | 7.1588033677  | -6.0907711693  | 56.9796842785  |
| O182 | 12.7305260266 | -10.3036864961 | 57.9711376085  |
| H183 | 12.2854552855 | -9.4347425973  | 57.7963616027  |
| H184 | 12.8427803510 | -10.6522009050 | 57.0698056347  |
| O185 | 15.3052821647 | -9.2985835707  | 58.0991454074  |
| H186 | 14.4098943659 | -9.7021351540  | 58.2155298278  |
| H187 | 15.9301816639 | -9.9845522749  | 58.3766847954  |

The structure of the TS with two water molecules in **Figure 8**.

Energies: E = -8182.627859, solv = -0.212304, disp = -243.34, Z<sub>0</sub> = 922.22

|     |               |               |               |
|-----|---------------|---------------|---------------|
| Mo1 | 16.5222710000 | -5.7099350000 | 53.3117920000 |
| Fe2 | 9.3558970000  | -7.0541860000 | 55.2066470000 |
| Fe3 | 11.5971170000 | -5.3305210000 | 55.5228220000 |
| Fe4 | 11.2195220000 | -6.8823150000 | 53.1265090000 |
| Fe5 | 12.1256710000 | -8.3090750000 | 55.3237040000 |
| Fe6 | 14.6480060000 | -7.8560300000 | 54.3947850000 |
| Fe7 | 14.3370680000 | -5.4038490000 | 55.3196640000 |
| Fe8 | 13.6434740000 | -5.7907070000 | 52.8533880000 |
| C9  | 17.8609020000 | -2.0818600000 | 54.3254530000 |
| H10 | 18.0543500000 | -1.0792960000 | 53.9387440000 |
| H11 | 16.7780080000 | -2.1728860000 | 54.4737370000 |
| C12 | 18.3046330000 | -3.1575270000 | 53.3105450000 |
| C13 | 19.7727010000 | -2.9258620000 | 52.8842620000 |
| H14 | 20.4109380000 | -3.1052700000 | 53.7544660000 |
| H15 | 19.8795830000 | -1.8756880000 | 52.5910250000 |
| C16 | 20.2076480000 | -3.8243660000 | 51.7073420000 |
| H17 | 19.7423980000 | -3.4988640000 | 50.7755530000 |
| H18 | 19.8909470000 | -4.8529690000 | 51.9129450000 |
| C19 | 17.4802420000 | -3.2542280000 | 51.9936420000 |
| O20 | 17.1467170000 | -4.4739200000 | 51.6612200000 |
| O21 | 17.3202400000 | -2.2505770000 | 51.3033830000 |
| O22 | 18.1909970000 | -4.4354190000 | 53.9642300000 |
| C23 | 12.7794650000 | -6.5727160000 | 54.4600220000 |
| S24 | 13.1548160000 | -3.9853070000 | 56.9183260000 |
| S25 | 16.2871660000 | -6.6199110000 | 55.6458530000 |
| S26 | 9.6918460000  | -5.0015580000 | 54.0697920000 |
| S27 | 13.8128260000 | -9.9352810000 | 55.3448200000 |
| S28 | 14.7849180000 | -3.8603660000 | 53.5183130000 |
| S29 | 10.0833970000 | -8.8568730000 | 53.7973710000 |
| S30 | 15.1920560000 | -7.4598760000 | 52.1374780000 |
| S31 | 12.0513910000 | -6.2206540000 | 50.8845510000 |
| H32 | 13.6351740000 | -2.1902110000 | 49.0425560000 |
| C33 | 13.2979240000 | -2.0241180000 | 50.0550230000 |
| H34 | 13.8879970000 | -2.6819610000 | 50.6983810000 |
| H35 | 13.4854980000 | -0.9844220000 | 50.3463880000 |
| N36 | 11.8751940000 | -2.3615490000 | 50.1449050000 |
| H37 | 11.2728080000 | -2.0111400000 | 49.4138740000 |
| C38 | 11.2471620000 | -2.8275320000 | 51.2418750000 |
| N39 | 11.8627020000 | -3.0459280000 | 52.3847870000 |
| H40 | 11.3597680000 | -3.6072240000 | 53.0840940000 |
| H41 | 12.8847500000 | -3.0511720000 | 52.5012090000 |
| N42 | 9.8952960000  | -3.0221510000 | 51.1828480000 |
| H43 | 9.5162290000  | -3.2857860000 | 50.2825570000 |
| H44 | 9.5078830000  | -3.5601300000 | 51.9660300000 |

|      |               |                |               |
|------|---------------|----------------|---------------|
| H45  | 7.9319230000  | 0.3854060000   | 59.4118020000 |
| C46  | 8.3427320000  | -1.3540230000  | 60.7005570000 |
| H47  | 8.1771970000  | -1.5695910000  | 61.7630410000 |
| H48  | 7.5879990000  | -1.9187380000  | 60.1408840000 |
| C49  | 9.7219670000  | -1.8265840000  | 60.3636530000 |
| N50  | 10.7057320000 | -1.8738840000  | 61.3336420000 |
| C51  | 10.2433670000 | -2.1990950000  | 59.1449400000 |
| H52  | 9.8048460000  | -2.3103380000  | 58.1650210000 |
| C53  | 11.7966010000 | -2.2710770000  | 60.7039090000 |
| H54  | 12.7643390000 | -2.4403510000  | 61.1549920000 |
| N55  | 11.5707720000 | -2.4739000000  | 59.3784690000 |
| H56  | 19.3112280000 | -4.3022310000  | 57.5267780000 |
| H57  | 16.7277080000 | -8.8408830000  | 50.7951690000 |
| C58  | 18.3819140000 | -7.4157810000  | 50.6146590000 |
| H59  | 17.7461300000 | -6.5269600000  | 50.5893880000 |
| H60  | 19.1918920000 | -7.2454080000  | 49.8913640000 |
| C61  | 18.9863180000 | -7.5304250000  | 51.9797690000 |
| N62  | 18.3429140000 | -7.0687460000  | 53.1181360000 |
| C63  | 20.1991210000 | -8.0585950000  | 52.3530670000 |
| H64  | 20.9921140000 | -8.5096770000  | 51.7761610000 |
| C65  | 19.1415820000 | -7.3061940000  | 54.1471280000 |
| H66  | 18.9569730000 | -7.0369980000  | 55.1758430000 |
| N67  | 20.2731010000 | -7.9144640000  | 53.7278060000 |
| H68  | 21.0511840000 | -8.1375880000  | 54.3301070000 |
| H69  | 6.9549920000  | -10.5579030000 | 56.9279050000 |
| C70  | 6.1750550000  | -9.8249630000  | 56.6900010000 |
| H71  | 5.5309550000  | -10.2322280000 | 56.0424860000 |
| H72  | 5.6932320000  | -9.5371410000  | 57.6127200000 |
| S73  | 8.1353510000  | -7.8783310000  | 57.0106010000 |
| H74  | 12.2324230000 | -2.7848440000  | 58.6681270000 |
| H75  | 18.4033900000 | -4.2414980000  | 54.9643940000 |
| C76  | 18.5154520000 | -2.2153500000  | 55.7289580000 |
| O77  | 18.7950470000 | -3.4181640000  | 56.1208560000 |
| O78  | 18.6853670000 | -1.1843600000  | 56.4010760000 |
| C79  | 21.6933910000 | -3.8327750000  | 51.5140750000 |
| O80  | 22.3220090000 | -3.5190270000  | 50.5222520000 |
| O81  | 22.3208170000 | -4.2658020000  | 52.6398600000 |
| H82  | 15.7024660000 | -0.1996320000  | 61.4912310000 |
| C83  | 14.8549940000 | -0.0829910000  | 60.8320020000 |
| H84  | 13.9165020000 | -0.2867340000  | 61.3260940000 |
| H85  | 14.8271150000 | 0.9920590000   | 60.5860880000 |
| C86  | 15.0599850000 | -0.8751950000  | 59.5441990000 |
| H87  | 14.3670420000 | -0.5164880000  | 58.7729950000 |
| H88  | 14.8188130000 | -1.9310930000  | 59.7127620000 |
| C89  | 16.4934860000 | -0.8059800000  | 59.0105870000 |
| H90  | 16.8865380000 | 0.2197400000   | 59.0710680000 |
| H91  | 16.5330830000 | -1.0677560000  | 57.9468920000 |
| C92  | 17.4568020000 | -1.7383830000  | 59.7571320000 |
| O93  | 17.1336230000 | -2.3509530000  | 60.7802000000 |
| N94  | 18.7004130000 | -1.8150680000  | 59.2101500000 |
| H95  | 19.2544200000 | -2.5998180000  | 59.5328210000 |
| H96  | 18.8204220000 | -1.5595400000  | 58.2189950000 |
| C97  | 10.6519930000 | 0.0100030000   | 53.3460010000 |
| H98  | 11.1636990000 | 0.9592720000   | 53.2872700000 |
| H99  | 9.5863320000  | 0.1850130000   | 53.3579370000 |
| H100 | 10.9227350000 | -0.5850400000  | 52.4729710000 |
| C101 | 11.0744150000 | -0.6455010000  | 54.6775680000 |
| H102 | 10.7485140000 | -1.6944470000  | 54.6780190000 |
| C103 | 10.3751330000 | 0.0593570000   | 55.8509430000 |
| H104 | 9.2830650000  | -0.0230260000  | 55.7744580000 |
| H105 | 10.6294190000 | 1.1289360000   | 55.8722400000 |
| H106 | 10.6777090000 | -0.3703110000  | 56.8121850000 |
| C107 | 12.5977090000 | -0.6054250000  | 54.8620780000 |
| H108 | 13.1290860000 | -1.0957510000  | 54.0401610000 |
| H109 | 12.9004170000 | -1.1109980000  | 55.7851080000 |
| H110 | 12.9499980000 | 0.4349130000   | 54.9158350000 |
| H111 | 13.4550780000 | -12.2303880000 | 53.1883140000 |
| C112 | 13.9110010000 | -11.6210560000 | 52.4219860000 |
| H113 | 14.8007580000 | -11.1317190000 | 52.8249170000 |
| H114 | 14.1416860000 | -12.2047940000 | 51.5262260000 |
| N115 | 12.8367060000 | -10.6665110000 | 52.1251520000 |
| H116 | 12.2080540000 | -10.4404730000 | 52.8987900000 |
| C117 | 12.6931280000 | -9.9409640000  | 51.0253570000 |
| N118 | 13.7285280000 | -9.8258910000  | 50.1479630000 |
| H119 | 13.5459580000 | -9.1868700000  | 49.3817280000 |

|      |              |               |               |
|------|--------------|---------------|---------------|
| H120 | 14.613200000 | -9.598617000  | 50.604448000  |
| N121 | 11.496514000 | -9.396239000  | 50.727465000  |
| H122 | 10.802907000 | -9.449228000  | 51.482389000  |
| H123 | 11.537862000 | -8.440646000  | 50.351667000  |
| H124 | 19.219229000 | -8.221627000  | 61.702834000  |
| C125 | 19.597894000 | -7.229879000  | 61.990051000  |
| H126 | 20.640012000 | -7.352305000  | 62.303571000  |
| C127 | 18.823870000 | -6.709755000  | 63.197136000  |
| O128 | 19.368973000 | -6.310510000  | 64.223663000  |
| C129 | 19.491871000 | -6.271799000  | 60.799063000  |
| H130 | 19.822926000 | -5.272056000  | 61.103051000  |
| H131 | 18.441945000 | -6.156001000  | 60.510517000  |
| C132 | 20.283497000 | -6.726169000  | 59.561007000  |
| H133 | 20.081759000 | -7.780767000  | 59.338423000  |
| H134 | 21.364486000 | -6.664638000  | 59.756604000  |
| C135 | 20.029408000 | -5.977626000  | 58.244031000  |
| O136 | 20.311817000 | -6.480660000  | 57.167986000  |
| O137 | 19.516682000 | -4.759784000  | 58.403818000  |
| N138 | 17.474950000 | -6.713119000  | 63.006104000  |
| H139 | 17.124478000 | -6.984666000  | 62.096122000  |
| C140 | 16.536885000 | -6.005885000  | 63.853040000  |
| H141 | 15.885596000 | -6.726367000  | 64.369771000  |
| H142 | 17.122424000 | -5.483608000  | 64.614173000  |
| C143 | 15.662889000 | -5.016754000  | 63.041912000  |
| H144 | 16.275169000 | -4.171481000  | 62.709300000  |
| H145 | 14.890878000 | -4.621783000  | 63.716035000  |
| C146 | 15.033183000 | -5.687212000  | 61.835658000  |
| C147 | 13.972817000 | -6.597098000  | 61.974725000  |
| H148 | 13.527254000 | -6.754905000  | 62.955949000  |
| C149 | 15.580359000 | -5.483429000  | 60.558585000  |
| H150 | 16.368497000 | -4.744704000  | 60.432511000  |
| C151 | 13.486880000 | -7.304298000  | 60.872959000  |
| H152 | 12.665479000 | -8.007199000  | 60.988258000  |
| C153 | 15.106988000 | -6.200697000  | 59.454781000  |
| H154 | 15.548476000 | -6.046518000  | 58.473588000  |
| C155 | 14.065514000 | -7.118528000  | 59.613168000  |
| H156 | 13.709180000 | -7.683439000  | 58.757812000  |
| H157 | 9.003756000  | 0.705074000   | 60.775269000  |
| C158 | 8.126981000  | 0.156080000   | 60.465000000  |
| H159 | 7.283672000  | 0.459242000   | 61.067770000  |
| H160 | 10.765030000 | -6.261355000  | 58.159956000  |
| H161 | 18.259279000 | -9.498753000  | 50.150540000  |
| C162 | 17.583975000 | -8.655921000  | 50.152027000  |
| H163 | 17.277363000 | -8.441989000  | 49.138799000  |
| H164 | 23.274010000 | -4.230630000  | 52.437074000  |
| H165 | 11.038939000 | -5.340393000  | 50.720926000  |
| H166 | 13.713135000 | -10.193031000 | 57.014647000  |
| H167 | 13.229166000 | -4.852797000  | 57.954939000  |
| C168 | 6.782746000  | -8.609687000  | 56.007146000  |
| H169 | 7.191699000  | -8.904190000  | 55.034999000  |
| H170 | 6.005904000  | -7.855214000  | 55.827915000  |
| N171 | 11.384284000 | -7.732399000  | 57.072322000  |
| N172 | 11.049512000 | -6.523834000  | 57.197644000  |
| H173 | 7.149394000  | -5.835410000  | 59.821894000  |
| C174 | 6.959015000  | -4.800933000  | 59.500004000  |
| H175 | 5.903926000  | -4.490355000  | 59.518145000  |
| H176 | 7.494932000  | -4.166018000  | 60.219778000  |
| C177 | 7.461893000  | -4.489176000  | 58.087521000  |
| H178 | 8.510008000  | -4.797936000  | 57.964303000  |
| H179 | 7.429402000  | -3.402454000  | 57.933617000  |
| O180 | 6.646277000  | -5.065116000  | 57.082275000  |
| H181 | 7.004995000  | -5.970310000  | 56.955248000  |
| O182 | 11.354717000 | -9.562435000  | 58.815340000  |
| H183 | 11.332425000 | -8.681873000  | 58.132793000  |
| H184 | 10.566754000 | -10.058286000 | 58.535177000  |
| O185 | 13.511277000 | -10.546653000 | 58.132723000  |
| H186 | 12.516050000 | -10.157271000 | 58.440708000  |
| H187 | 13.436839000 | -11.512670000 | 58.0499730000 |

Optimized TS for the reaction between a proton on S2B and a hydride in **Figure 10**.

Energies: E= -7921.449548, solv = -0.201939, disp = -229.81 Z<sub>0</sub> = 892.83

|     |               |                |               |
|-----|---------------|----------------|---------------|
| Mo1 | 16.3679620000 | -5.6352600000  | 53.2479690000 |
| Fe2 | 10.0227010000 | -8.3632910000  | 56.0110220000 |
| Fe3 | 11.1856240000 | -5.7755490000  | 54.9548510000 |
| Fe4 | 11.2990670000 | -7.6702080000  | 53.1473690000 |
| Fe5 | 12.6065660000 | -8.6713440000  | 55.5416660000 |
| Fe6 | 14.6863490000 | -7.7230190000  | 54.1244620000 |
| Fe7 | 13.9249480000 | -5.3952190000  | 55.3789900000 |
| Fe8 | 13.3091590000 | -5.8724810000  | 52.8453580000 |
| C9  | 17.7966750000 | -2.0592940000  | 54.3383230000 |
| H10 | 18.0062930000 | -1.0548190000  | 53.9658930000 |
| H11 | 16.7110610000 | -2.1376950000  | 54.4823370000 |
| C12 | 18.2263790000 | -3.1288060000  | 53.3123250000 |
| C13 | 19.7114420000 | -2.9455630000  | 52.9195250000 |
| H14 | 20.3258410000 | -3.1217930000  | 53.8079600000 |
| H15 | 19.8487600000 | -1.9043440000  | 52.6075120000 |
| C16 | 20.1530230000 | -3.8796290000  | 51.7735360000 |
| H17 | 19.6635890000 | -3.6019680000  | 50.8383770000 |
| H18 | 19.8703170000 | -4.9078690000  | 52.0243100000 |
| C19 | 17.4084930000 | -3.1582390000  | 51.9913400000 |
| O20 | 16.9857470000 | -4.3435690000  | 51.6439390000 |
| O21 | 17.3105860000 | -2.1341670000  | 51.3194630000 |
| O22 | 18.0491660000 | -4.4096700000  | 53.9428130000 |
| C23 | 12.6985680000 | -7.0080770000  | 54.3861950000 |
| S24 | 12.2638640000 | -4.3890760000  | 56.6696130000 |
| S25 | 16.0493470000 | -6.4200350000  | 55.5905560000 |
| S26 | 9.2983250000  | -4.9741080000  | 53.6893860000 |
| S27 | 14.6572480000 | -9.9064420000  | 55.3821430000 |
| S28 | 14.4874760000 | -3.9392360000  | 53.4770070000 |
| S29 | 10.3116260000 | -9.5666670000  | 53.9523530000 |
| S30 | 15.0515800000 | -7.2255370000  | 51.8627760000 |
| S31 | 11.5971920000 | -6.4729240000  | 50.9933500000 |
| H32 | 13.6351740000 | -2.1902110000  | 49.0425560000 |
| C33 | 13.2979250000 | -2.0241170000  | 50.0550230000 |
| H34 | 13.8490640000 | -2.7060870000  | 50.7079260000 |
| H35 | 13.4963980000 | -0.9914250000  | 50.3616370000 |
| N36 | 11.8622850000 | -2.3323840000  | 50.0737020000 |
| H37 | 11.3168800000 | -1.9889680000  | 49.2963640000 |
| C38 | 11.1457400000 | -2.7758190000  | 51.1228050000 |
| N39 | 11.6730080000 | -3.0057320000  | 52.3058560000 |
| H40 | 11.0887600000 | -3.4754150000  | 53.0070620000 |
| H41 | 12.6844540000 | -3.0261500000  | 52.4980120000 |
| N42 | 9.7958620000  | -2.9249090000  | 50.9635690000 |
| H43 | 9.4852400000  | -3.2041440000  | 50.0419200000 |
| H44 | 9.3368000000  | -3.4372820000  | 51.7254090000 |
| H45 | 7.9327580000  | 0.3836580000   | 59.4111830000 |
| C46 | 8.3565360000  | -1.3521590000  | 60.7050850000 |
| H47 | 8.1964790000  | -1.5586850000  | 61.7706680000 |
| H48 | 7.5957720000  | -1.9219990000  | 60.1581510000 |
| C49 | 9.7292810000  | -1.8564890000  | 60.3701340000 |
| N50 | 10.7159550000 | -1.9134300000  | 61.3388350000 |
| C51 | 10.2208830000 | -2.3321800000  | 59.1743760000 |
| H52 | 9.7773680000  | -2.4733490000  | 58.2013550000 |
| C53 | 11.7721670000 | -2.4255120000  | 60.7308330000 |
| H54 | 12.7266640000 | -2.6406030000  | 61.1913870000 |
| N55 | 11.5263270000 | -2.6858880000  | 59.4194240000 |
| H56 | 19.2300670000 | -4.3354010000  | 57.5135530000 |
| H57 | 16.7220740000 | -8.8577410000  | 50.7840610000 |
| C58 | 18.3625060000 | -7.4131770000  | 50.6405710000 |
| H59 | 17.7283050000 | -6.5248590000  | 50.5706810000 |
| H60 | 19.2105470000 | -7.2526850000  | 49.9604730000 |
| C61 | 18.8873560000 | -7.5127440000  | 52.0400370000 |
| N62 | 18.1709310000 | -7.0520680000  | 53.1357200000 |
| C63 | 20.0814430000 | -8.0259510000  | 52.4883490000 |
| H64 | 20.9120180000 | -8.4711010000  | 51.9620000000 |
| C65 | 18.9109440000 | -7.2790540000  | 54.2107210000 |
| H66 | 18.6645010000 | -7.0074670000  | 55.2251390000 |
| N67 | 20.0710690000 | -7.8760320000  | 53.8643380000 |
| H68 | 20.8158400000 | -8.0726040000  | 54.5168250000 |
| H69 | 6.9200170000  | -10.5883850000 | 56.9481570000 |
| C70 | 6.1750520000  | -9.8249630000  | 56.6900010000 |
| H71 | 5.5309560000  | -10.2322290000 | 56.0424860000 |
| H72 | 5.6932330000  | -9.5371420000  | 57.6127210000 |
| S73 | 8.1485600000  | -8.0037510000  | 57.2974810000 |
| H74 | 12.1225940000 | -3.1563080000  | 58.7387340000 |



|      |               |                |               |
|------|---------------|----------------|---------------|
| H75  | 18.2638790000 | -4.2388340000  | 54.9491110000 |
| C76  | 18.4545130000 | -2.2288290000  | 55.7362150000 |
| O77  | 18.6873090000 | -3.4467710000  | 56.1136690000 |
| O78  | 18.6768030000 | -1.2114240000  | 56.4119390000 |
| C79  | 21.6361410000 | -3.8498460000  | 51.5397230000 |
| O80  | 22.2187060000 | -3.5171120000  | 50.5265080000 |
| O81  | 22.3208180000 | -4.2658020000  | 52.6398600000 |
| H82  | 15.7024660000 | -0.1996320000  | 61.4912310000 |
| C83  | 14.8549930000 | -0.0829910000  | 60.8320020000 |
| H84  | 13.9165020000 | -0.2867340000  | 61.3260940000 |
| H85  | 14.8276830000 | 0.9921970000   | 60.5857630000 |
| C86  | 15.0599860000 | -0.8751940000  | 59.5441990000 |
| H87  | 14.3700440000 | -0.5139630000  | 58.7715580000 |
| H88  | 14.8126430000 | -1.9293790000  | 59.7140460000 |
| C89  | 16.4964890000 | -0.8066100000  | 59.0170120000 |
| H90  | 16.8888280000 | 0.2192500000   | 59.0824350000 |
| H91  | 16.5430160000 | -1.0643190000  | 57.9525850000 |
| C92  | 17.4572240000 | -1.7370530000  | 59.7694000000 |
| O93  | 17.1352480000 | -2.3371290000  | 60.7995930000 |
| N94  | 18.7004360000 | -1.8258470000  | 59.2214350000 |
| H95  | 19.2512190000 | -2.6086140000  | 59.5536480000 |
| H96  | 18.8210880000 | -1.5807470000  | 58.2285100000 |
| C97  | 10.6519930000 | 0.0100030000   | 53.3460010000 |
| H98  | 11.1636990000 | 0.9592720000   | 53.2872700000 |
| H99  | 9.5863320000  | 0.1850130000   | 53.3579380000 |
| H100 | 10.9223770000 | -0.5771990000  | 52.4675930000 |
| C101 | 11.0739480000 | -0.6668030000  | 54.6672420000 |
| H102 | 10.7424680000 | -1.7133980000  | 54.6564470000 |
| C103 | 10.3861360000 | 0.0196100000   | 55.8578650000 |
| H104 | 9.2923800000  | -0.0348250000  | 55.7750210000 |
| H105 | 10.6641840000 | 1.0821450000   | 55.9129320000 |
| H106 | 10.6744540000 | -0.4492920000  | 56.8048240000 |
| C107 | 12.5976620000 | -0.6527700000  | 54.8503680000 |
| H108 | 13.1219510000 | -1.1075470000  | 54.0034180000 |
| H109 | 12.8889140000 | -1.2189220000  | 55.7412110000 |
| H110 | 12.9635140000 | 0.3788780000   | 54.9579110000 |
| H111 | 13.4550780000 | -12.2303890000 | 53.1883140000 |
| C112 | 13.9110020000 | -11.6210550000 | 52.4219870000 |
| H113 | 14.7084060000 | -11.0094140000 | 52.8509010000 |
| H114 | 14.2826070000 | -12.2314000000 | 51.5947750000 |
| N115 | 12.7562210000 | -10.8227900000 | 51.9868100000 |
| H116 | 12.0051220000 | -10.6942110000 | 52.6815980000 |
| C117 | 12.6392830000 | -10.0872260000 | 50.8925200000 |
| N118 | 13.7265280000 | -9.7777060000  | 50.1444710000 |
| H119 | 13.5296980000 | -9.1850810000  | 49.3455020000 |
| H120 | 14.5135290000 | -9.4069510000  | 50.6868000000 |
| N121 | 11.4046710000 | -9.7105080000  | 50.4741300000 |
| H122 | 10.6566050000 | -9.9449850000  | 51.1267560000 |
| H123 | 11.3365450000 | -8.7261320000  | 50.1908400000 |
| H124 | 19.2259210000 | -8.2228850000  | 61.6971090000 |
| C125 | 19.5978930000 | -7.2298800000  | 61.9900500000 |
| H126 | 20.6371450000 | -7.3480590000  | 62.3126770000 |
| C127 | 18.8071620000 | -6.7226090000  | 63.1898330000 |
| O128 | 19.3410050000 | -6.3573130000  | 64.2348310000 |
| C129 | 19.4918720000 | -6.2717980000  | 60.7990630000 |
| H130 | 19.8631280000 | -5.2823720000  | 61.0898350000 |
| H131 | 18.4384930000 | -6.1188710000  | 60.5390590000 |
| C132 | 20.2299140000 | -6.7559510000  | 59.5387750000 |
| H133 | 19.9948350000 | -7.8076820000  | 59.3351570000 |
| H134 | 21.3183630000 | -6.7205120000  | 59.6947330000 |
| C135 | 19.9464730000 | -6.0157070000  | 58.2230160000 |
| O136 | 20.1848450000 | -6.5352020000  | 57.1430870000 |
| O137 | 19.4583640000 | -4.7896170000  | 58.3865570000 |
| N138 | 17.4599510000 | -6.7015540000  | 62.9805490000 |
| H139 | 17.1084680000 | -6.9340940000  | 62.0600630000 |
| C140 | 16.5368850000 | -6.0058840000  | 63.8530420000 |
| H141 | 15.8691670000 | -6.7294600000  | 64.3435990000 |
| H142 | 17.1393320000 | -5.5338120000  | 64.6334690000 |
| C143 | 15.6934720000 | -4.9598840000  | 63.0961340000 |
| H144 | 16.3455360000 | -4.1696130000  | 62.7080540000 |
| H145 | 15.0164490000 | -4.4936090000  | 63.8258200000 |
| C146 | 14.8940820000 | -5.5671970000  | 61.9577500000 |
| C147 | 13.8413840000 | -6.4607380000  | 62.2128480000 |
| H148 | 13.5687860000 | -6.6895220000  | 63.2423550000 |
| C149 | 15.2161200000 | -5.2732770000  | 60.6234920000 |

|      |               |               |               |
|------|---------------|---------------|---------------|
| H150 | 16.0065190000 | -4.5550940000 | 60.4164320000 |
| C151 | 13.1300200000 | -7.0465640000 | 61.1650300000 |
| H152 | 12.3085170000 | -7.7261980000 | 61.3796690000 |
| C153 | 14.5024390000 | -5.8582350000 | 59.5714640000 |
| H154 | 14.7466020000 | -5.6091210000 | 58.5430590000 |
| C155 | 13.4591810000 | -6.7474240000 | 59.8394550000 |
| H156 | 12.8945070000 | -7.1859270000 | 59.0213550000 |
| H157 | 9.0037560000  | 0.7050730000  | 60.7752690000 |
| C158 | 8.1269800000  | 0.1560800000  | 60.4650000000 |
| H159 | 7.2836720000  | 0.4592420000  | 61.0677700000 |
| H160 | 8.5127620000  | -4.5675980000 | 54.7138740000 |
| H161 | 18.2592780000 | -9.4987530000 | 50.1505400000 |
| C162 | 17.5839750000 | -8.6559200000 | 50.1520260000 |
| H163 | 17.2773630000 | -8.4419890000 | 49.1387990000 |
| H164 | 23.2631710000 | -4.1959410000 | 52.3987660000 |
| H165 | 10.4172040000 | -5.8442570000 | 51.2104630000 |
| H166 | 15.2532550000 | -9.3716210000 | 56.4711060000 |
| H167 | 11.2469110000 | -5.9074260000 | 56.8699990000 |
| H168 | 11.4999640000 | -9.0384330000 | 56.8387980000 |
| H169 | 10.7361900000 | -6.6333400000 | 56.6471480000 |
| C170 | 6.8818380000  | -8.6156770000 | 56.0980160000 |
| H171 | 6.1706860000  | -7.8043620000 | 55.9018420000 |
| H172 | 7.3626130000  | -8.8692420000 | 55.1470940000 |
| H173 | 7.1493940000  | -5.8354100000 | 59.8218940000 |
| C174 | 6.9590150000  | -4.8009330000 | 59.5000040000 |
| H175 | 5.9039260000  | -4.4903550000 | 59.5181450000 |
| H176 | 7.4690370000  | -4.1778720000 | 60.2495290000 |
| C177 | 7.5685650000  | -4.4606140000 | 58.1359730000 |
| H178 | 8.6376910000  | -4.7133350000 | 58.1355930000 |
| H179 | 7.4943510000  | -3.3764680000 | 57.9809440000 |
| O180 | 6.9105860000  | -5.0627310000 | 57.0290400000 |
| H181 | 7.2781800000  | -5.9716060000 | 56.9791910000 |

Optimized TS for the reaction between a proton on S1A and a hydride in **Figure 11**.

Energies: E= -7921.427857, solv = -0.203768, disp = -227.86 Z<sub>0</sub> = 891.42

|     |               |                |               |
|-----|---------------|----------------|---------------|
| Mo1 | 16.1147450000 | -6.0168710000  | 53.4621550000 |
| Fe2 | 9.5001490000  | -9.5249710000  | 54.3030630000 |
| Fe3 | 10.6819880000 | -7.0498320000  | 55.4919440000 |
| Fe4 | 10.6380670000 | -7.4440280000  | 52.6752040000 |
| Fe5 | 12.0510460000 | -9.3420940000  | 54.6191390000 |
| Fe6 | 14.4752770000 | -8.2310520000  | 54.4988160000 |
| Fe7 | 13.4141960000 | -6.0220600000  | 55.3334660000 |
| Fe8 | 13.1759890000 | -6.4111160000  | 52.7729190000 |
| C9  | 17.5025640000 | -2.3402050000  | 54.4082110000 |
| H10 | 17.6503380000 | -1.3519190000  | 53.9688510000 |
| H11 | 16.4269800000 | -2.4703380000  | 54.5878770000 |
| C12 | 17.9637200000 | -3.4493710000  | 53.4370060000 |
| C13 | 19.4509400000 | -3.2206910000  | 53.0565180000 |
| H14 | 20.0527240000 | -3.2602890000  | 53.9705780000 |
| H15 | 19.5210470000 | -2.2083050000  | 52.6434560000 |
| C16 | 20.0080670000 | -4.2241460000  | 52.0243920000 |
| H17 | 19.4272310000 | -4.1762050000  | 51.1007380000 |
| H18 | 19.9428380000 | -5.2372680000  | 52.4311110000 |
| C19 | 17.1366210000 | -3.5449990000  | 52.1239420000 |
| O20 | 16.7102840000 | -4.7422910000  | 51.8326340000 |
| O21 | 17.0103850000 | -2.5465490000  | 51.4166680000 |
| O22 | 17.7985160000 | -4.7023620000  | 54.1204480000 |
| C23 | 12.1711820000 | -7.4445430000  | 54.1281010000 |
| S24 | 11.6443160000 | -5.3400590000  | 56.9439240000 |
| S25 | 15.6749610000 | -6.6983360000  | 55.8180880000 |
| S26 | 9.4742560000  | -5.3925240000  | 53.7139300000 |
| S27 | 13.9493380000 | -10.1473450000 | 55.8141600000 |
| S28 | 14.1700940000 | -4.4067190000  | 53.6620540000 |
| S29 | 8.9486860000  | -9.0391210000  | 52.1758640000 |
| S30 | 15.0252840000 | -7.8585560000  | 52.2583130000 |
| S31 | 11.8997450000 | -6.5882040000  | 50.6464650000 |
| H32 | 13.6351740000 | -2.1902110000  | 49.0425560000 |
| C33 | 13.2979250000 | -2.0241170000  | 50.0550230000 |
| H34 | 13.9411030000 | -2.6024650000  | 50.7230230000 |

|      |               |                |               |
|------|---------------|----------------|---------------|
| H35  | 13.3571650000 | -0.9616380000  | 50.3125410000 |
| N36  | 11.9052490000 | -2.5075680000  | 50.0836940000 |
| H37  | 11.4144350000 | -2.5036300000  | 49.2024180000 |
| C38  | 11.2123700000 | -2.9735680000  | 51.1374190000 |
| N39  | 11.7509610000 | -3.0774040000  | 52.3421900000 |
| H40  | 11.1761900000 | -3.5241260000  | 53.0544540000 |
| H41  | 12.7588890000 | -3.2740100000  | 52.4914540000 |
| N42  | 9.8928220000  | -3.2664660000  | 50.9967150000 |
| H43  | 9.5143150000  | -3.3649630000  | 50.0651230000 |
| H44  | 9.5100000000  | -3.9143530000  | 51.6995560000 |
| H45  | 7.9292940000  | 0.3927200000   | 59.4135250000 |
| C46  | 8.3650070000  | -1.3508760000  | 60.6815600000 |
| H47  | 8.2889660000  | -1.5636420000  | 61.7551090000 |
| H48  | 7.5609930000  | -1.9136950000  | 60.1917640000 |
| C49  | 9.7045110000  | -1.8564130000  | 60.2311490000 |
| N50  | 10.7700020000 | -1.9195730000  | 61.1118490000 |
| C51  | 10.0881690000 | -2.3357070000  | 58.9986830000 |
| H52  | 9.5564210000  | -2.4717320000  | 58.0700420000 |
| C53  | 11.7673930000 | -2.4386910000  | 60.4203890000 |
| H54  | 12.7559680000 | -2.6598680000  | 60.7992400000 |
| N55  | 11.4109040000 | -2.6952130000  | 59.1312510000 |
| H56  | 19.1638870000 | -4.3669290000  | 57.5372060000 |
| H57  | 16.7059160000 | -8.9143700000  | 50.7405970000 |
| C58  | 18.2969820000 | -7.4385910000  | 50.7721230000 |
| H59  | 17.6397510000 | -6.5647730000  | 50.7512810000 |
| H60  | 19.1752960000 | -7.1907360000  | 50.1596690000 |
| C61  | 18.7570760000 | -7.6514190000  | 52.1890850000 |
| N62  | 17.9903290000 | -7.3075020000  | 53.2962300000 |
| C63  | 19.9540800000 | -8.1556580000  | 52.6415830000 |
| H64  | 20.8206080000 | -8.5217810000  | 52.1121050000 |
| C65  | 18.7020720000 | -7.5896840000  | 54.3744270000 |
| H66  | 18.4117080000 | -7.3963070000  | 55.3954840000 |
| N67  | 19.8958910000 | -8.1164180000  | 54.0242770000 |
| H68  | 20.6352070000 | -8.3158440000  | 54.6819830000 |
| H69  | 6.9102560000  | -10.5978290000 | 56.9440400000 |
| C70  | 6.1750520000  | -9.8249630000  | 56.6900010000 |
| H71  | 5.5309560000  | -10.2322290000 | 56.0424860000 |
| H72  | 5.6932330000  | -9.5371420000  | 57.6127210000 |
| S73  | 8.7260090000  | -8.6407230000  | 56.3916810000 |
| H74  | 11.9350630000 | -3.2155950000  | 58.4332530000 |
| H75  | 18.0128330000 | -4.4919070000  | 55.1050030000 |
| C76  | 18.2184050000 | -2.4027650000  | 55.7838860000 |
| O77  | 18.4631310000 | -3.5913740000  | 56.2335540000 |
| O78  | 18.4820250000 | -1.3415480000  | 56.3740110000 |
| C79  | 21.4391740000 | -3.9230390000  | 51.6569420000 |
| O80  | 21.8298840000 | -3.4223260000  | 50.6209610000 |
| O81  | 22.3208180000 | -4.2658020000  | 52.6398600000 |
| H82  | 15.7024660000 | -0.1996320000  | 61.4912310000 |
| C83  | 14.8549930000 | -0.0829910000  | 60.8320020000 |
| H84  | 13.9165020000 | -0.2867340000  | 61.3260940000 |
| H85  | 14.8296490000 | 0.9921210000   | 60.5860860000 |
| C86  | 15.0599860000 | -0.8751940000  | 59.5441990000 |
| H87  | 14.3721610000 | -0.5090310000  | 58.7712630000 |
| H88  | 14.8086360000 | -1.9284490000  | 59.7163050000 |
| C89  | 16.4981910000 | -0.8186800000  | 59.0251830000 |
| H90  | 16.9112560000 | 0.1959420000   | 59.1274600000 |
| H91  | 16.5499090000 | -1.0424350000  | 57.9538890000 |
| C92  | 17.4306460000 | -1.7948210000  | 59.7556100000 |
| O93  | 17.0901880000 | -2.4078740000  | 60.7717260000 |
| N94  | 18.6696430000 | -1.9027510000  | 59.2002230000 |
| H95  | 19.1975840000 | -2.7117480000  | 59.5074080000 |
| H96  | 18.7678230000 | -1.6634690000  | 58.2034310000 |
| C97  | 10.6519930000 | 0.0100030000   | 53.3460010000 |
| H98  | 11.1636990000 | 0.9592720000   | 53.2872700000 |
| H99  | 9.5863320000  | 0.1850130000   | 53.3579380000 |
| H100 | 10.9210340000 | -0.5871780000  | 52.4722920000 |
| C101 | 11.0684110000 | -0.6617740000  | 54.6707250000 |
| H102 | 10.6834210000 | -1.6912390000  | 54.6769300000 |
| C103 | 10.4344950000 | 0.0794830000   | 55.8587030000 |
| H104 | 9.3387420000  | 0.0850660000   | 55.7890770000 |
| H105 | 10.7717090000 | 1.1253450000   | 55.8906980000 |
| H106 | 10.7064590000 | -0.3851880000  | 56.8129070000 |
| C107 | 12.5948380000 | -0.7150120000  | 54.8207270000 |
| H108 | 13.0699270000 | -1.2499900000  | 53.9930980000 |
| H109 | 12.8866960000 | -1.2272450000  | 55.7441670000 |

|      |              |               |              |
|------|--------------|---------------|--------------|
| H110 | 13.014690000 | 0.300402000   | 54.854446000 |
| H111 | 13.455078000 | -12.230389000 | 53.188314000 |
| C112 | 13.911002000 | -11.621055000 | 52.421987000 |
| H113 | 14.590436000 | -10.899213000 | 52.880777000 |
| H114 | 14.422636000 | -12.232770000 | 51.673018000 |
| N115 | 12.727376000 | -10.972901000 | 51.825883000 |
| H116 | 11.890527000 | -10.974995000 | 52.411503000 |
| C117 | 12.676992000 | -10.222797000 | 50.729130000 |
| N118 | 13.827018000 | -9.911506000  | 50.074187000 |
| H119 | 13.694733000 | -9.255160000  | 49.312004000 |
| H120 | 14.568344000 | -9.576294000  | 50.699833000 |
| N121 | 11.488726000 | -9.853029000  | 50.212459000 |
| H122 | 10.657487000 | -9.959785000  | 50.816634000 |
| H123 | 11.482594000 | -8.917325000  | 49.801001000 |
| H124 | 19.218515000 | -8.221261000  | 61.703048000 |
| C125 | 19.597893000 | -7.229880000  | 61.990050000 |
| H126 | 20.638946000 | -7.351292000  | 62.306509000 |
| C127 | 18.818228000 | -6.701936000  | 63.189189000 |
| O128 | 19.360883000 | -6.278427000  | 64.207180000 |
| C129 | 19.491872000 | -6.271798000  | 60.799063000 |
| H130 | 19.847890000 | -5.278210000  | 61.093238000 |
| H131 | 18.438833000 | -6.135740000  | 60.529382000 |
| C132 | 20.253117000 | -6.752178000  | 59.551267000 |
| H133 | 20.070691000 | -7.817749000  | 59.369910000 |
| H134 | 21.338001000 | -6.653335000  | 59.705276000 |
| C135 | 19.914657000 | -6.045232000  | 58.233888000 |
| O136 | 20.071070000 | -6.595758000  | 57.154262000 |
| O137 | 19.470453000 | -4.804071000  | 58.400329000 |
| N138 | 17.467530000 | -6.719581000  | 63.003250000 |
| H139 | 17.108443000 | -7.023237000  | 62.106833000 |
| C140 | 16.536885000 | -6.005884000  | 63.853042000 |
| H141 | 15.914599000 | -6.720246000  | 64.412248000 |
| H142 | 17.136494000 | -5.451032000  | 64.579555000 |
| C143 | 15.619614000 | -5.058807000  | 63.046170000 |
| H144 | 16.211407000 | -4.239519000  | 62.622856000 |
| H145 | 14.898874000 | -4.617229000  | 63.747907000 |
| C146 | 14.894988000 | -5.799493000  | 61.939521000 |
| C147 | 13.875450000 | -6.718439000  | 62.237452000 |
| H148 | 13.540196000 | -6.830837000  | 63.267683000 |
| C149 | 15.296746000 | -5.655740000  | 60.602697000 |
| H150 | 16.058167000 | -4.918503000  | 60.355037000 |
| C151 | 13.292563000 | -7.492557000  | 61.233994000 |
| H152 | 12.506165000 | -8.201299000  | 61.483005000 |
| C153 | 14.719819000 | -6.436469000  | 59.594418000 |
| H154 | 15.050174000 | -6.325477000  | 58.565721000 |
| C155 | 13.724999000 | -7.365825000  | 59.909980000 |
| H156 | 13.295813000 | -7.990781000  | 59.130394000 |
| H157 | 9.003756000  | 0.705073000   | 60.775269000 |
| C158 | 8.126980000  | 0.156080000   | 60.465000000 |
| H159 | 7.283672000  | 0.459242000   | 61.067770000 |
| H160 | 8.196007000  | -5.825504000  | 53.673798000 |
| H161 | 18.259278000 | -9.498753000  | 50.150540000 |
| C162 | 17.583975000 | -8.655920000  | 50.152026000 |
| H163 | 17.277363000 | -8.441989000  | 49.138799000 |
| H164 | 23.192766000 | -3.986710000  | 52.303681000 |
| H165 | 10.989007000 | -5.596800000  | 50.536603000 |
| H166 | 12.662054000 | -9.422905000  | 56.481400000 |
| H167 | 12.141116000 | -6.100216000  | 57.945797000 |
| H168 | 10.931390000 | -10.664050000 | 54.196140000 |
| H169 | 11.639250000 | -8.879311000  | 56.454103000 |
| C170 | 6.888661000  | -8.615364000  | 56.033296000 |
| H171 | 6.476395000  | -7.673819000  | 56.402237000 |
| H172 | 6.753377000  | -8.631619000  | 54.947021000 |
| H173 | 7.149394000  | -5.835410000  | 59.821894000 |
| C174 | 6.959015000  | -4.800933000  | 59.500004000 |
| H175 | 5.903926000  | -4.490355000  | 59.518145000 |
| H176 | 7.485562000  | -4.154837000  | 60.214593000 |
| C177 | 7.572267000  | -4.585351000  | 58.115218000 |
| H178 | 8.660773000  | -4.691591000  | 58.175948000 |
| H179 | 7.365125000  | -3.559743000  | 57.776536000 |
| O180 | 7.044680000  | -5.485775000  | 57.140634000 |
| H181 | 7.768775000  | -6.066840000  | 56.857126000 |

Optimized TS for the reaction between a proton on S2A and a hydride in **Figure 12**.

Energies: E= -7921.455527, solv = -0.202302, disp = -230.02 Z<sub>0</sub> = 892.88

|     |               |               |               |
|-----|---------------|---------------|---------------|
| Mo1 | 16.4618420000 | -5.4542580000 | 53.2002070000 |
| Fe2 | 9.9176320000  | -8.2084630000 | 56.0041510000 |
| Fe3 | 11.2935110000 | -5.6742600000 | 55.1076770000 |
| Fe4 | 11.1335510000 | -7.1654420000 | 53.0031990000 |
| Fe5 | 12.5037000000 | -8.3533010000 | 55.3383580000 |
| Fe6 | 14.6924080000 | -7.5527310000 | 54.0066300000 |
| Fe7 | 14.0603620000 | -5.3059750000 | 55.1647750000 |
| Fe8 | 13.4870940000 | -5.6746810000 | 52.6360010000 |
| C9  | 17.8749050000 | -1.9093620000 | 54.3931070000 |
| H10 | 18.0903990000 | -0.8958410000 | 54.0498060000 |
| H11 | 16.7879500000 | -1.9880580000 | 54.5249180000 |
| C12 | 18.3106120000 | -2.9523670000 | 53.3427920000 |
| C13 | 19.7967650000 | -2.7592910000 | 52.9597150000 |
| H14 | 20.4090220000 | -2.9908820000 | 53.8369890000 |
| H15 | 19.9462070000 | -1.7044490000 | 52.7049830000 |
| C16 | 20.2273250000 | -3.6326440000 | 51.7607020000 |
| H17 | 19.7810010000 | -3.2611960000 | 50.8367390000 |
| H18 | 19.8863440000 | -4.6595840000 | 51.9298720000 |
| C19 | 17.5059510000 | -2.9583440000 | 52.0122770000 |
| O20 | 17.1038750000 | -4.1424060000 | 51.6339180000 |
| O21 | 17.4108700000 | -1.9228130000 | 51.3593650000 |
| O22 | 18.1325690000 | -4.2484760000 | 53.9421740000 |
| C23 | 12.7510840000 | -6.7017670000 | 54.2228500000 |
| S24 | 12.3906880000 | -4.2284730000 | 56.6857720000 |
| S25 | 16.1197980000 | -6.3333090000 | 55.5171710000 |
| S26 | 9.5174000000  | -5.3165120000 | 53.2104190000 |
| S27 | 14.5008920000 | -9.7315620000 | 55.2342990000 |
| S28 | 14.5940300000 | -3.7202510000 | 53.4280720000 |
| S29 | 10.4318150000 | -9.2480280000 | 53.9009300000 |
| S30 | 15.2304430000 | -7.0668480000 | 51.7912680000 |
| S31 | 12.0084130000 | -6.2650690000 | 50.6526060000 |
| H32 | 13.6351740000 | -2.1902100000 | 49.0425560000 |
| C33 | 13.2979250000 | -2.0241170000 | 50.0550230000 |
| H34 | 13.7879460000 | -2.7615030000 | 50.6946300000 |
| H35 | 13.5805960000 | -1.0199640000 | 50.3886940000 |
| N36 | 11.8458440000 | -2.2141030000 | 50.0652480000 |
| H37 | 11.3202140000 | -1.8328250000 | 49.2921830000 |
| C38 | 11.1191020000 | -2.7637930000 | 51.0533490000 |
| N39 | 11.6210190000 | -3.0598760000 | 52.2353200000 |
| H40 | 11.0677480000 | -3.7124520000 | 52.8213380000 |
| H41 | 12.6209860000 | -2.9960450000 | 52.4538550000 |
| N42 | 9.7825440000  | -2.9595010000 | 50.8448060000 |
| H43 | 9.5227000000  | -3.2171530000 | 49.9003620000 |
| H44 | 9.3477470000  | -3.5611830000 | 51.5609080000 |
| H45 | 7.9329470000  | 0.3863160000  | 59.4118810000 |
| C46 | 8.3550300000  | -1.3536390000 | 60.6987060000 |
| H47 | 8.1663480000  | -1.5747480000 | 61.7562770000 |
| H48 | 7.6197470000  | -1.9254540000 | 60.1210930000 |
| C49 | 9.7466310000  | -1.8215850000 | 60.3977450000 |
| N50 | 10.7077250000 | -1.8512870000 | 61.3930060000 |
| C51 | 10.2932690000 | -2.2346750000 | 59.2039130000 |
| H52 | 9.8786950000  | -2.3752770000 | 58.2179630000 |
| C53 | 11.8080290000 | -2.2805070000 | 60.8042210000 |
| H54 | 12.7614400000 | -2.4509130000 | 61.2845670000 |
| N55 | 11.6120650000 | -2.5176050000 | 59.4789130000 |
| H56 | 19.2684080000 | -4.2838050000 | 57.5427100000 |
| H57 | 16.7290110000 | -8.8432410000 | 50.7951180000 |
| C58 | 18.3755620000 | -7.4051210000 | 50.6053180000 |
| H59 | 17.7456120000 | -6.5167960000 | 50.5129850000 |
| H60 | 19.2163600000 | -7.2719300000 | 49.9099520000 |
| C61 | 18.9172200000 | -7.4572850000 | 52.0006870000 |
| N62 | 18.2693050000 | -6.8688510000 | 53.0783740000 |
| C63 | 20.0792630000 | -8.0337100000 | 52.4561840000 |
| H64 | 20.8587860000 | -8.5751680000 | 51.9421050000 |
| C65 | 19.0188200000 | -7.0844810000 | 54.1493410000 |
| H66 | 18.8204880000 | -6.7424100000 | 55.1524630000 |
| N67 | 20.1189740000 | -7.7927830000 | 53.8180950000 |
| H68 | 20.8536390000 | -8.0263980000 | 54.4696080000 |

|      |              |               |              |
|------|--------------|---------------|--------------|
| H69  | 6.896000000  | -10.608768000 | 56.957107000 |
| C70  | 6.175052000  | -9.824963000  | 56.690001000 |
| H71  | 5.530956000  | -10.232229000 | 56.042486000 |
| H72  | 5.693233000  | -9.537142000  | 57.612721000 |
| S73  | 8.179444000  | -8.176718000  | 57.490734000 |
| H74  | 12.277361000 | -2.876336000  | 58.802509000 |
| H75  | 18.334791000 | -4.101118000  | 54.954013000 |
| C76  | 18.517528000 | -2.116202000  | 55.793668000 |
| O77  | 18.742418000 | -3.343238000  | 56.146334000 |
| O78  | 18.732840000 | -1.115875000  | 56.497444000 |
| C79  | 21.716894000 | -3.654819000  | 51.584710000 |
| O80  | 22.365561000 | -3.207896000  | 50.659616000 |
| O81  | 22.320818000 | -4.265802000  | 52.639860000 |
| H82  | 15.702466000 | -0.199632000  | 61.491231000 |
| C83  | 14.854993000 | -0.082991000  | 60.832002000 |
| H84  | 13.916502000 | -0.286734000  | 61.326094000 |
| H85  | 14.827649000 | 0.991756000   | 60.585847000 |
| C86  | 15.059986000 | -0.875194000  | 59.544199000 |
| H87  | 14.377444000 | -0.507040000  | 58.768043000 |
| H88  | 14.807716000 | -1.928883000  | 59.712984000 |
| C89  | 16.499541000 | -0.819433000  | 59.026844000 |
| H90  | 16.900331000 | 0.202891000   | 59.088124000 |
| H91  | 16.550937000 | -1.083303000  | 57.964269000 |
| C92  | 17.445124000 | -1.758114000  | 59.788517000 |
| O93  | 17.092715000 | -2.388637000  | 60.790729000 |
| N94  | 18.705151000 | -1.821153000  | 59.279554000 |
| H95  | 19.251900000 | -2.609525000  | 59.605208000 |
| H96  | 18.852960000 | -1.543926000  | 58.298252000 |
| C97  | 10.651993000 | 0.010003000   | 53.346001000 |
| H98  | 11.163699000 | 0.959272000   | 53.287270000 |
| H99  | 9.586332000  | 0.185013000   | 53.357938000 |
| H100 | 10.919680000 | -0.580278000  | 52.468847000 |
| C101 | 11.076064000 | -0.663493000  | 54.667345000 |
| H102 | 10.751491000 | -1.712510000  | 54.648413000 |
| C103 | 10.380954000 | 0.020817000   | 55.854934000 |
| H104 | 9.288552000  | -0.056366000  | 55.778281000 |
| H105 | 10.638429000 | 1.089100000   | 55.895444000 |
| H106 | 10.682870000 | -0.427127000  | 56.808197000 |
| C107 | 12.600003000 | -0.630019000  | 54.847578000 |
| H108 | 13.128442000 | -1.101420000  | 54.013000000 |
| H109 | 12.904804000 | -1.161192000  | 55.756050000 |
| H110 | 12.954451000 | 0.407956000   | 54.927273000 |
| H111 | 13.455078000 | -12.230389000 | 53.188314000 |
| C112 | 13.911002000 | -11.621055000 | 52.421987000 |
| H113 | 14.757089000 | -11.072562000 | 52.844232000 |
| H114 | 14.223879000 | -12.232856000 | 51.570694000 |
| N115 | 12.802247000 | -10.743618000 | 52.032250000 |
| H116 | 12.065248000 | -10.576825000 | 52.732400000 |
| C117 | 12.733353000 | -9.965702000  | 50.960025000 |
| N118 | 13.833994000 | -9.735108000  | 50.199774000 |
| H119 | 13.696446000 | -9.047896000  | 49.465879000 |
| H120 | 14.674369000 | -9.521741000  | 50.735481000 |
| N121 | 11.538801000 | -9.471487000  | 50.570116000 |
| H122 | 10.780056000 | -9.638527000  | 51.232327000 |
| H123 | 11.558733000 | -8.484507000  | 50.267308000 |
| H124 | 19.212577000 | -8.219966000  | 61.705892000 |
| C125 | 19.597893000 | -7.229880000  | 61.990050000 |
| H126 | 20.639305000 | -7.356108000  | 62.303455000 |
| C127 | 18.823347000 | -6.694924000  | 63.190407000 |
| O128 | 19.371507000 | -6.240837000  | 64.191423000 |
| C129 | 19.491872000 | -6.271798000  | 60.799063000 |
| H130 | 19.853450000 | -5.280789000  | 61.096856000 |
| H131 | 18.437834000 | -6.128781000  | 60.536455000 |
| C132 | 20.241197000 | -6.739612000  | 59.539842000 |
| H133 | 20.001845000 | -7.785750000  | 59.313530000 |
| H134 | 21.327860000 | -6.714718000  | 59.709195000 |
| C135 | 19.981562000 | -5.972334000  | 58.233904000 |
| O136 | 20.254433000 | -6.462776000  | 57.149089000 |
| O137 | 19.472281000 | -4.755582000  | 58.411098000 |
| N138 | 17.469437000 | -6.745984000  | 63.024612000 |
| H139 | 17.112484000 | -7.046250000  | 62.126021000 |
| C140 | 16.536885000 | -6.005884000  | 63.853042000 |
| H141 | 15.865323000 | -6.705972000  | 64.370813000 |
| H142 | 17.129512000 | -5.490293000  | 64.612836000 |
| C143 | 15.699758000 | -5.001363000  | 63.026797000 |

|      |               |               |               |
|------|---------------|---------------|---------------|
| H144 | 16.3470830000 | -4.1990850000 | 62.6562610000 |
| H145 | 14.9683100000 | -4.5426280000 | 63.7064980000 |
| C146 | 14.9888240000 | -5.6561970000 | 61.8554110000 |
| C147 | 13.9149700000 | -6.5384150000 | 62.0580780000 |
| H148 | 13.5503930000 | -6.7166080000 | 63.0687200000 |
| C149 | 15.4276290000 | -5.4278950000 | 60.5412780000 |
| H150 | 16.2294200000 | -4.7137560000 | 60.3687620000 |
| C151 | 13.3008300000 | -7.1793660000 | 60.9811220000 |
| H152 | 12.4630370000 | -7.8504280000 | 61.1545210000 |
| C153 | 14.8193960000 | -6.0755730000 | 59.4593650000 |
| H154 | 15.1734460000 | -5.8884920000 | 58.4484740000 |
| C155 | 13.7552730000 | -6.9554450000 | 59.6769050000 |
| H156 | 13.2767030000 | -7.4574860000 | 58.8391540000 |
| H157 | 9.0037560000  | 0.7050730000  | 60.7752690000 |
| C158 | 8.1269800000  | 0.1560800000  | 60.4650000000 |
| H159 | 7.2836720000  | 0.4592420000  | 61.0677700000 |
| H160 | 9.3526530000  | -5.8834640000 | 54.8382570000 |
| H161 | 18.2592780000 | -9.4987530000 | 50.1505400000 |
| C162 | 17.5839750000 | -8.6559200000 | 50.1520260000 |
| H163 | 17.2773630000 | -8.4419890000 | 49.1387990000 |
| H164 | 23.2775150000 | -4.2119100000 | 52.4584870000 |
| H165 | 10.8241320000 | -5.6167760000 | 50.7162270000 |
| H166 | 15.1287660000 | -9.2242390000 | 56.3171260000 |
| H167 | 12.3946920000 | -5.2103580000 | 57.6191670000 |
| H168 | 11.5237490000 | -8.4044670000 | 56.8009180000 |
| H169 | 9.5768840000  | -6.3081640000 | 55.6580330000 |
| C170 | 6.9378430000  | -8.6187130000 | 56.1786840000 |
| H171 | 6.2736770000  | -7.7639700000 | 56.0098780000 |
| H172 | 7.4439960000  | -8.8363400000 | 55.2309580000 |
| H173 | 7.1493940000  | -5.8354100000 | 59.8218940000 |
| C174 | 6.9590150000  | -4.8009330000 | 59.5000040000 |
| H175 | 5.9039260000  | -4.4903550000 | 59.5181450000 |
| H176 | 7.4831910000  | -4.1659550000 | 60.2288350000 |
| C177 | 7.5291900000  | -4.5174930000 | 58.1084030000 |
| H178 | 8.6103410000  | -4.7186400000 | 58.0965100000 |
| H179 | 7.3975030000  | -3.4529680000 | 57.8730520000 |
| O180 | 6.8708160000  | -5.2423230000 | 57.0832200000 |
| H181 | 7.2871120000  | -6.1286290000 | 57.0970370000 |

Optimized position for a water molecule in the Fe2, Fe6, Val70 region  
in **Figure 13**.

Energies: E= -7997.906419, solv = -0.204742, disp = -241.15 Z<sub>0</sub> = 911.62

|     |               |                |               |
|-----|---------------|----------------|---------------|
| Mo1 | 16.3773842157 | -6.2201207089  | 53.6474057688 |
| Fe2 | 10.0021115268 | -9.5121256834  | 55.8780721718 |
| Fe3 | 11.2166256958 | -6.9810213039  | 55.8038580223 |
| Fe4 | 11.2468952393 | -8.2380549797  | 53.4862448904 |
| Fe5 | 12.5645161938 | -9.5097942105  | 55.8843894581 |
| Fe6 | 14.7052867869 | -8.5487598585  | 54.5255511070 |
| Fe7 | 14.0546160447 | -6.4428888370  | 55.9316277417 |
| Fe8 | 13.3312772622 | -6.5012158796  | 53.4010277233 |
| C9  | 17.5210584587 | -2.4521832477  | 54.4797326076 |
| H10 | 17.6043389762 | -1.4562099689  | 54.0411031966 |
| H11 | 16.4608522611 | -2.6354656044  | 54.6952148731 |
| C12 | 18.0059403564 | -3.5283828502  | 53.4768672485 |
| C13 | 19.4432430596 | -3.1850292045  | 53.0081256304 |
| H14 | 20.0886256530 | -3.1532830126  | 53.8929435277 |
| H15 | 19.4151988128 | -2.1815597793  | 52.5696225248 |
| C16 | 20.0276372874 | -4.1763373827  | 51.9800747246 |
| H17 | 19.4616293395 | -4.1315980433  | 51.0462865318 |
| H18 | 19.9629077411 | -5.1894964300  | 52.3853053098 |
| C19 | 17.0761780407 | -3.6639392596  | 52.2367207563 |
| O20 | 16.6624665283 | -4.8705394579  | 51.9863324722 |
| O21 | 16.8337330827 | -2.6661967278  | 51.5518144030 |
| O22 | 18.0042402693 | -4.8029865256  | 54.1497690693 |
| C23 | 12.7568244156 | -7.8369207535  | 54.7917931763 |
| S24 | 12.3968347627 | -5.7239092096  | 57.5951299408 |
| S25 | 16.2493343995 | -7.2973359360  | 55.9241434812 |
| S26 | 9.7217832456  | -5.5706433588  | 54.4020703103 |
| S28 | 14.6903476626 | -10.7163068213 | 55.7514127672 |
| S29 | 14.4842013984 | -4.6540635300  | 54.2964525749 |

|      |                |                 |                |
|------|----------------|-----------------|----------------|
| S30  | 9.9458982094   | -10.0966951957  | 53.5702927346  |
| S31  | 15.0768167396  | -7.8363453775   | 52.3334969995  |
| S32  | 11.6928694549  | -6.7547840164   | 51.5107951137  |
| H33  | 13.6351741281# | -2.1902107774#  | 49.0425560013# |
| C34  | 13.2979245943# | -2.0241170144#  | 50.0550233218# |
| H35  | 14.1359585917  | -2.3250165164   | 50.6902535814  |
| H36  | 13.1087999689  | -0.9538177343   | 50.2034971020  |
| N37  | 12.0998930518  | -2.8146239454   | 50.3514994437  |
| H38  | 11.4618837277  | -3.0009648129   | 49.5919400546  |
| C39  | 11.6428197161  | -3.0623752503   | 51.6001411740  |
| N40  | 12.4393896182  | -2.9180445221   | 52.6515368081  |
| H41  | 12.0922041096  | -3.1473501368   | 53.5908380197  |
| H42  | 13.4381620281  | -3.1082782482   | 52.5714497761  |
| N43  | 10.3425618437  | -3.3691960135   | 51.7958918394  |
| H44  | 9.7521132126   | -3.5260404061   | 50.9915715923  |
| H45  | 10.0877875570  | -3.9161951278   | 52.6318008717  |
| H46  | 7.9178694891   | 0.4395073261    | 59.4259050264  |
| C47  | 8.3735220212   | -1.3544951836   | 60.5727334882  |
| H48  | 8.5012702887   | -1.6314588044   | 61.6260837225  |
| H49  | 7.4850857680   | -1.8869998595   | 60.2099004194  |
| C50  | 9.5972841869   | -1.8110531719   | 59.8334568705  |
| N51  | 10.7898637231  | -2.0274290618   | 60.4969756057  |
| C52  | 9.7618589505   | -2.0586992670   | 58.4887390428  |
| H53  | 9.0820240150   | -2.0161707049   | 57.6526691112  |
| C54  | 11.6423709473  | -2.4149673257   | 59.5659018555  |
| H55  | 12.6701185573  | -2.6977700008   | 59.7399402997  |
| N56  | 11.0768445696  | -2.4349698271   | 58.3284459875  |
| H57  | 19.0905762860  | -4.4381567114   | 57.5468643487  |
| H58  | 16.7171758104  | -8.8904254477   | 50.7660039878  |
| C59  | 18.3326901889  | -7.4273728372   | 50.7034026644  |
| H60  | 17.6584000188  | -6.5680917422   | 50.7642710069  |
| H61  | 19.1351904036  | -7.1585841308   | 50.0022760790  |
| C62  | 18.9457280578  | -7.6576059465   | 52.0512932266  |
| N63  | 18.2714493615  | -7.4155559766   | 53.2400429949  |
| C64  | 20.2033768280  | -8.1188396693   | 52.3550002750  |
| H65  | 21.0280405465  | -8.4144262021   | 51.7248946612  |
| C66  | 19.0984162345  | -7.7155527832   | 54.2306106346  |
| H67  | 18.9033856544  | -7.5890014452   | 55.2850365529  |
| N68  | 20.2761957645  | -8.1568236131   | 53.7367944167  |
| H69  | 21.0823278981  | -8.3764592381   | 54.3024325260  |
| H70  | 6.8930128508   | -10.6129674494  | 56.9523300316  |
| C71  | 6.1750524232#  | -9.8249631940#  | 56.6900007489# |
| H72  | 5.5309557341#  | -10.2322287736# | 56.0424861413# |
| H73  | 5.6932327210#  | -9.5371417037#  | 57.6127207510# |
| S74  | 8.4325682323   | -8.2768850626   | 57.1045185452  |
| H75  | 11.4741770610  | -2.8161293847   | 57.4660649040  |
| H76  | 18.2340249235  | -4.5685309864   | 55.1347972672  |
| C78  | 18.2645562658  | -2.4882360678   | 55.8348942000  |
| O79  | 18.5754507746  | -3.6759324043   | 56.2500818677  |
| O80  | 18.4808479689  | -1.4327167526   | 56.4496390961  |
| C81  | 21.4672545989  | -3.8704539216   | 51.6504941501  |
| O82  | 21.8864386700  | -3.3314593505   | 50.6449474241  |
| O83  | 22.3208176291# | -4.2658020463#  | 52.6398596376# |
| H84  | 15.7024656764# | -0.1996317185#  | 61.4912312893# |
| C85  | 14.8549934557# | -0.0829911608#  | 60.8320021121# |
| H86  | 13.9165015895# | -0.2867338793#  | 61.3260937710# |
| H87  | 14.8316706074  | 0.9919586761    | 60.5856276345  |
| C88  | 15.0599857050# | -0.8751944201#  | 59.5441990054# |
| H89  | 14.4191750147  | -0.4676256614   | 58.7521311649  |
| H90  | 14.7537014123  | -1.9171737751   | 59.6871036995  |
| C91  | 16.5152343257  | -0.8864137962   | 59.0747735861  |
| H92  | 16.9836820958  | 0.0984378788    | 59.2216362751  |
| H93  | 16.5902818124  | -1.0805976723   | 57.9992822792  |
| C94  | 17.3647488299  | -1.9380277712   | 59.8012463344  |
| O95  | 16.9592585112  | -2.5699659698   | 60.7797120932  |
| N96  | 18.6173007855  | -2.0912830170   | 59.2829191982  |
| H97  | 19.0860843785  | -2.9452612157   | 59.5637869053  |
| H98  | 18.7574536666  | -1.8168626221   | 58.3028758741  |
| C99  | 10.6519926687# | 0.0100032631#   | 53.3460013693# |
| H100 | 11.1636988274# | 0.9592721372#   | 53.2872697144# |
| H101 | 9.5863320466#  | 0.1850133191#   | 53.3579374811# |
| H102 | 10.9514479228  | -0.6441049895   | 52.5280118340  |
| C103 | 11.0409037046  | -0.4873435781   | 54.7544143792  |
| H104 | 10.7639315313  | -1.5364136960   | 54.8709483742  |
| C105 | 10.2766353642  | 0.3362872317    | 55.8030743243  |



|      |                |                 |                |
|------|----------------|-----------------|----------------|
| H106 | 9.1903562109   | 0.2115194054    | 55.6984654883  |
| H107 | 10.4984253443  | 1.4084154334    | 55.6943049794  |
| H108 | 10.5493356513  | 0.0394305603    | 56.8201001557  |
| C109 | 12.5511551277  | -0.3622684244   | 54.9938692121  |
| H110 | 13.1316494193  | -0.9059214384   | 54.2418894511  |
| H111 | 12.8286228243  | -0.7566631135   | 55.9764853267  |
| H112 | 12.8599191367  | 0.6928349522    | 54.9550720600  |
| H113 | 13.4550780847# | -12.2303887257# | 53.1883138641# |
| C114 | 13.9110014278# | -11.6210552988# | 52.4219871242# |
| H115 | 14.6099268803  | -10.9059066635  | 52.8616892510  |
| H116 | 14.3990756578  | -12.2340558602  | 51.6594437413  |
| N117 | 12.7104603946  | -10.9672165738  | 51.8717090384  |
| H118 | 11.8814508046  | -10.9524065345  | 52.4922359813  |
| C119 | 12.6087346440  | -10.1946731779  | 50.8044846749  |
| N120 | 13.7106813016  | -9.7996334830   | 50.1208417789  |
| H121 | 13.5190229982  | -9.1634420472   | 49.3553705897  |
| H122 | 14.4671577019  | -9.4448123002   | 50.7198901148  |
| N123 | 11.3724298490  | -9.8521174447   | 50.3451944659  |
| H124 | 10.6211018301  | -10.1203661858  | 50.9862747804  |
| H125 | 11.2956496889  | -8.8521136879   | 50.1414554368  |
| H126 | 19.1649531103  | -8.2046407000   | 61.7255501856  |
| C127 | 19.5978932924# | -7.2298795333#  | 61.9900501767# |
| H128 | 20.6425970791  | -7.3919678445   | 62.2751186909  |
| C129 | 18.8636769750  | -6.6300364800   | 63.1926976657  |
| O130 | 19.4295588396  | -6.0044780889   | 64.0856707634  |
| C131 | 19.4918719702# | -6.2717980970#  | 60.7990634052# |
| H132 | 19.9843618893  | -5.3246166398   | 61.0436112828  |
| H133 | 18.4423128549  | -6.0284900833   | 60.6136958201  |
| C134 | 20.0963278592  | -6.8770340899   | 59.5214193551  |
| H135 | 19.7177530832  | -7.8952299568   | 59.3648707023  |
| H136 | 21.1867639152  | -6.9805187798   | 59.6185847235  |
| C137 | 19.8305233652  | -6.1281361404   | 58.2158681899  |
| O138 | 20.0861334254  | -6.6180187491   | 57.1248644854  |
| O139 | 19.3171045824  | -4.9217994557   | 58.4127484181  |
| N140 | 17.5106594801  | -6.8094347499   | 63.1278127998  |
| H141 | 17.1490053424  | -7.2724177776   | 62.3028548767  |
| C142 | 16.5368854453# | -6.0058843768#  | 63.8530414353# |
| H143 | 15.9828725082  | -6.6415891000   | 64.5589750187  |
| H144 | 17.0938856471  | -5.2677980330   | 64.4360935171  |
| C145 | 15.5431386222  | -5.3229843948   | 62.8793260282  |
| H146 | 16.0511817435  | -4.5129525125   | 62.3442791963  |
| H147 | 14.7406320366  | -4.8688809440   | 63.4750294919  |
| C148 | 14.9746561330  | -6.3186137224   | 61.8855598199  |
| C149 | 14.0216069362  | -7.2749761443   | 62.2726614081  |
| H150 | 13.6095489718  | -7.2428512661   | 63.2798661651  |
| C151 | 15.4769065297  | -6.3710250053   | 60.5748530347  |
| H152 | 16.1755632312  | -5.6061287423   | 60.2439705223  |
| C153 | 13.5934605708  | -8.2610872526   | 61.3818624681  |
| H154 | 12.8442942538  | -8.9845482520   | 61.6936895003  |
| C155 | 15.0631244588  | -7.3660199938   | 59.6833297655  |
| H156 | 15.4622192259  | -7.3800838616   | 58.6727394579  |
| C157 | 14.1220709975  | -8.3172099884   | 60.0877421956  |
| H158 | 13.7870136483  | -9.0844652800   | 59.3941303646  |
| H159 | 9.0037560460#  | 0.7050733324#   | 60.7752693400# |
| C160 | 8.1269803486#  | 0.1560802985#   | 60.4649995486# |
| H161 | 7.2836720179#  | 0.4592420071#   | 61.0677700273# |
| H268 | 8.6306183113   | -5.4598366652   | 55.1948900265  |
| H269 | 18.2592781541# | -9.4987528752#  | 50.1505401201# |
| C270 | 17.5839755870# | -8.6559201244#  | 50.1520261842# |
| H271 | 17.2773625962# | -8.4419892869#  | 49.1387987594# |
| H273 | 23.2042271274  | -3.9798789799   | 52.3412840500  |
| H274 | 10.5611113384  | -6.0997811266   | 51.8525720396  |
| H275 | 15.3187669771  | -10.1634682011  | 56.8124318575  |
| H277 | 12.5533259559  | -6.7437724931   | 58.4630775105  |
| H278 | 11.3467457687  | -10.7274407363  | 56.2919533440  |
| H279 | 11.1950880210  | -8.5371357179   | 56.8387620328  |
| C280 | 6.9383949387   | -8.6554879299   | 56.0791138990  |
| H281 | 6.3097724277   | -7.7593173679   | 56.0275085240  |
| H282 | 7.2605190468   | -8.8906734545   | 55.0589784375  |
| H283 | 7.1493941354#  | -5.8354098835#  | 59.8218942939# |
| C284 | 6.9590149597#  | -4.8009334214#  | 59.5000035190# |
| H285 | 5.9039260052#  | -4.4903549822#  | 59.5181449940# |
| H286 | 7.4947047716   | -4.1546393089   | 60.2071924483  |
| C287 | 7.5324089474   | -4.5705797736   | 58.0970944140  |
| H288 | 8.6238221857   | -4.6880950801   | 58.1161160584  |

|      |               |               |               |
|------|---------------|---------------|---------------|
| H289 | 7.3236987217  | -3.5403568452 | 57.7857873726 |
| O290 | 6.9561257098  | -5.4110938534 | 57.1042462352 |
| H291 | 7.4468141575  | -6.2590214156 | 57.1514306919 |
| O292 | 11.7867711517 | -3.3674876907 | 55.5746999925 |
| H293 | 12.6693334330 | -3.7951719711 | 55.5828297792 |
| H294 | 11.1489866929 | -4.1081108886 | 55.4313715520 |

Optimized TS for the reaction between a proton on S2A and a hydride after an addition of a water molecule in **Figure 14**.

Energies: E= -7997.871643, solv = -0.206917, disp = -237.69 Z<sub>0</sub> = 908.99

|     |               |                |               |
|-----|---------------|----------------|---------------|
| Mo1 | 16.7137430000 | -6.0433800000  | 53.7395300000 |
| Fe2 | 10.1118000000 | -8.7224260000  | 56.5280670000 |
| Fe3 | 12.0025490000 | -6.4928810000  | 56.3085980000 |
| Fe4 | 11.3736400000 | -7.5335460000  | 53.9021490000 |
| Fe5 | 12.7012470000 | -9.2290190000  | 55.9420980000 |
| Fe6 | 14.9949360000 | -8.3696160000  | 54.7297070000 |
| Fe7 | 14.7369150000 | -6.1736670000  | 56.0616580000 |
| Fe8 | 13.8193070000 | -6.3217220000  | 53.5388240000 |
| C9  | 17.8017690000 | -2.2475960000  | 54.5340630000 |
| H10 | 17.8806650000 | -1.2535800000  | 54.0895710000 |
| H11 | 16.7458330000 | -2.4142630000  | 54.7787970000 |
| C12 | 18.2434130000 | -3.3283940000  | 53.5227700000 |
| C13 | 19.6486410000 | -2.9979340000  | 52.9682540000 |
| H14 | 20.3531040000 | -3.0302530000  | 53.8056870000 |
| H15 | 19.6286590000 | -1.9754410000  | 52.5757100000 |
| C16 | 20.1062970000 | -3.9650390000  | 51.8565400000 |
| H17 | 19.5683490000 | -3.7688140000  | 50.9266900000 |
| H18 | 19.8948840000 | -4.9901520000  | 52.1753810000 |
| C19 | 17.2729270000 | -3.4977570000  | 52.3209200000 |
| O20 | 16.9433790000 | -4.7297980000  | 52.0567370000 |
| O21 | 16.9483920000 | -2.5119360000  | 51.6582650000 |
| O22 | 18.2994600000 | -4.5955180000  | 54.2121420000 |
| C23 | 13.1440980000 | -7.4632160000  | 55.0687090000 |
| S24 | 13.3357930000 | -5.2611390000  | 57.8692990000 |
| S25 | 16.7800130000 | -7.2532610000  | 55.9745560000 |
| S26 | 9.9451920000  | -5.6456630000  | 54.1765720000 |
| S27 | 14.6747350000 | -10.6315150000 | 55.7545170000 |
| S28 | 14.8845520000 | -4.4215030000  | 54.3994360000 |
| S29 | 10.5862530000 | -9.7039380000  | 54.4083810000 |
| S30 | 15.4444820000 | -7.7866810000  | 52.5370420000 |
| S31 | 12.3755840000 | -6.4710360000  | 51.5298830000 |
| H32 | 13.6351740000 | -2.1902110000  | 49.0425560000 |
| C33 | 13.2979250000 | -2.0241170000  | 50.0550240000 |
| H34 | 14.1423170000 | -2.3103010000  | 50.6885670000 |
| H35 | 13.1089820000 | -0.9521500000  | 50.1946490000 |
| N36 | 12.1081860000 | -2.8071600000  | 50.3607370000 |
| H37 | 11.5312260000 | -3.1353150000  | 49.6020280000 |
| C38 | 11.6851560000 | -3.0680240000  | 51.6170060000 |
| N39 | 12.5086550000 | -2.9147220000  | 52.6489680000 |
| H40 | 12.1546200000 | -3.0482500000  | 53.6060220000 |
| H41 | 13.5039740000 | -3.1086690000  | 52.5575840000 |
| N42 | 10.4032330000 | -3.4033610000  | 51.8406750000 |
| H43 | 9.7543230000  | -3.4200520000  | 51.0670010000 |
| H44 | 10.1744670000 | -4.0223350000  | 52.6503270000 |
| H45 | 7.9170920000  | 0.4387320000   | 59.4257030000 |
| C46 | 8.3816330000  | -1.3551250000  | 60.5725440000 |
| H47 | 8.5367680000  | -1.6255290000  | 61.6239090000 |
| H48 | 7.4846370000  | -1.8906070000  | 60.2358830000 |
| C49 | 9.5861260000  | -1.8203040000  | 59.8023700000 |
| N50 | 10.7922740000 | -2.0635740000  | 60.4316940000 |
| C51 | 9.7088180000  | -2.0681420000  | 58.4519790000 |
| H52 | 9.0056290000  | -2.0114620000  | 57.6359570000 |
| C53 | 11.6133600000 | -2.4634510000  | 59.4767610000 |
| H54 | 12.6414020000 | -2.7646800000  | 59.6104090000 |
| N55 | 11.0098040000 | -2.4760400000  | 58.2555630000 |
| H56 | 19.4404230000 | -4.2384330000  | 57.6199880000 |
| H57 | 16.7252930000 | -8.8807610000  | 50.7776560000 |
| C58 | 18.3415840000 | -7.4096040000  | 50.6612590000 |
| H59 | 17.6526450000 | -6.5680730000  | 50.7714140000 |

|      |               |                |               |
|------|---------------|----------------|---------------|
| H60  | 19.0725530000 | -7.1202180000  | 49.8928680000 |
| C61  | 19.0871170000 | -7.5925050000  | 51.9514760000 |
| N62  | 18.5934080000 | -7.1940470000  | 53.1871600000 |
| C63  | 20.3448280000 | -8.1125600000  | 52.1420510000 |
| H64  | 21.0636370000 | -8.5181230000  | 51.4464170000 |
| C65  | 19.5239910000 | -7.4577980000  | 54.0927170000 |
| H66  | 19.4715200000 | -7.2371040000  | 55.1497470000 |
| N67  | 20.5986730000 | -8.0244230000  | 53.4992830000 |
| H68  | 21.4498130000 | -8.2768340000  | 53.9780540000 |
| H69  | 6.8609790000  | -10.6361900000 | 56.9742480000 |
| C70  | 6.1750530000  | -9.8249630000  | 56.6900010000 |
| H71  | 5.5309560000  | -10.2322290000 | 56.0424860000 |
| H72  | 5.6932330000  | -9.5371420000  | 57.6127210000 |
| S73  | 8.1573570000  | -8.2562980000  | 57.6251910000 |
| H74  | 11.3943420000 | -2.8242310000  | 57.3744540000 |
| H75  | 18.5863530000 | -4.3392880000  | 55.1844850000 |
| C76  | 18.5720670000 | -2.2725570000  | 55.8748590000 |
| O77  | 18.9822360000 | -3.4405310000  | 56.2600930000 |
| O78  | 18.7086390000 | -1.2179160000  | 56.5115540000 |
| C79  | 21.5784350000 | -3.8580420000  | 51.5730950000 |
| O80  | 22.1080670000 | -3.4689830000  | 50.5509400000 |
| O81  | 22.3208170000 | -4.2658020000  | 52.6398600000 |
| H82  | 15.7024660000 | -0.1996320000  | 61.4912310000 |
| C83  | 14.8549930000 | -0.0829910000  | 60.8320020000 |
| H84  | 13.9165020000 | -0.2867340000  | 61.3260940000 |
| H85  | 14.8298390000 | 0.9926610000   | 60.5867240000 |
| C86  | 15.0599860000 | -0.8751940000  | 59.5441990000 |
| H87  | 14.3905910000 | -0.4955700000  | 58.7619410000 |
| H88  | 14.7891700000 | -1.9238130000  | 59.7089340000 |
| C89  | 16.5056110000 | -0.8439150000  | 59.0445920000 |
| H90  | 16.9239240000 | 0.1717130000   | 59.1067080000 |
| H91  | 16.5677940000 | -1.1143820000  | 57.9841940000 |
| C92  | 17.4237960000 | -1.7950320000  | 59.8254120000 |
| O93  | 17.0451570000 | -2.4288920000  | 60.8117590000 |
| N94  | 18.7019060000 | -1.8555420000  | 59.3494690000 |
| H95  | 19.2306220000 | -2.6572460000  | 59.6732920000 |
| H96  | 18.8652880000 | -1.5836320000  | 58.3723630000 |
| C97  | 10.6519930000 | 0.0100030000   | 53.3460010000 |
| H98  | 11.1636990000 | 0.9592720000   | 53.2872700000 |
| H99  | 9.5863320000  | 0.1850130000   | 53.3579370000 |
| H100 | 10.9539030000 | -0.6494080000  | 52.5331600000 |
| C101 | 11.0338150000 | -0.4749860000  | 54.7633930000 |
| H102 | 10.7357500000 | -1.5174380000  | 54.8973950000 |
| C103 | 10.2769840000 | 0.3746660000   | 55.7985590000 |
| H104 | 9.1898260000  | 0.2581920000   | 55.6948310000 |
| H105 | 10.5094360000 | 1.4425820000   | 55.6727940000 |
| H106 | 10.5451210000 | 0.0922730000   | 56.8214620000 |
| C107 | 12.5455520000 | -0.3639500000  | 55.0029580000 |
| H108 | 13.1218070000 | -0.9009000000  | 54.2436550000 |
| H109 | 12.8234270000 | -0.7697630000  | 55.9810730000 |
| H110 | 12.8611990000 | 0.6893680000   | 54.9744610000 |
| H111 | 13.4550780000 | -12.2303890000 | 53.1883140000 |
| C112 | 13.9110010000 | -11.6210550000 | 52.4219870000 |
| H113 | 14.7319290000 | -11.0296770000 | 52.8362180000 |
| H114 | 14.2385740000 | -12.2206210000 | 51.5686660000 |
| N115 | 12.7439110000 | -10.7972590000 | 52.0654720000 |
| H116 | 12.0170670000 | -10.7285640000 | 52.7913600000 |
| C117 | 12.6167790000 | -9.9147220000  | 51.0870200000 |
| N118 | 13.6796190000 | -9.5460260000  | 50.3339840000 |
| H119 | 13.4784900000 | -8.7878420000  | 49.6900410000 |
| H120 | 14.5220120000 | -9.3395310000  | 50.8806420000 |
| N121 | 11.3859590000 | -9.4224810000  | 50.7910770000 |
| H122 | 10.6658290000 | -9.7019060000  | 51.4561640000 |
| H123 | 11.4077610000 | -8.3939630000  | 50.6974520000 |
| H124 | 19.1816310000 | -8.2119690000  | 61.7238990000 |
| C125 | 19.5978930000 | -7.2298790000  | 61.9900500000 |
| H126 | 20.6424600000 | -7.3738440000  | 62.2846470000 |
| C127 | 18.8501860000 | -6.6264800000  | 63.1793260000 |
| O128 | 19.4077670000 | -5.9582480000  | 64.0448740000 |
| C129 | 19.4918720000 | -6.2717980000  | 60.7990630000 |
| H130 | 19.9133830000 | -5.3008830000  | 61.0804100000 |
| H131 | 18.4394990000 | -6.0826430000  | 60.5630710000 |
| C132 | 20.1952620000 | -6.8063740000  | 59.5431500000 |
| H133 | 19.7966730000 | -7.7919740000  | 59.2706000000 |
| H134 | 21.2657340000 | -6.9647790000  | 59.7391200000 |

|      |               |                |               |
|------|---------------|----------------|---------------|
| C135 | 20.0986450000 | -5.9575960000  | 58.2727850000 |
| O136 | 20.4794510000 | -6.3824700000  | 57.1929180000 |
| O137 | 19.5894640000 | -4.7490950000  | 58.4821810000 |
| N138 | 17.4983830000 | -6.8333260000  | 63.1386820000 |
| H139 | 17.1283170000 | -7.3540140000  | 62.3531470000 |
| C140 | 16.5368850000 | -6.0058840000  | 63.8530410000 |
| H141 | 16.0299790000 | -6.5970800000  | 64.6296930000 |
| H142 | 17.1053730000 | -5.2164370000  | 64.3515730000 |
| C143 | 15.4848900000 | -5.4057940000  | 62.8912930000 |
| H144 | 15.9808530000 | -4.7135760000  | 62.2004710000 |
| H145 | 14.7811710000 | -4.8129580000  | 63.4887530000 |
| C146 | 14.7378420000 | -6.4843740000  | 62.1321430000 |
| C147 | 13.6306610000 | -7.1330020000  | 62.7014140000 |
| H148 | 13.2637990000 | -6.8057530000  | 63.6725990000 |
| C149 | 15.1777500000 | -6.9143460000  | 60.8705300000 |
| H150 | 15.9997910000 | -6.3938340000  | 60.3842190000 |
| C151 | 12.9835450000 | -8.1736650000  | 62.0341420000 |
| H152 | 12.1139550000 | -8.6464250000  | 62.4842760000 |
| C153 | 14.5438060000 | -7.9703050000  | 60.2059500000 |
| H154 | 14.9013340000 | -8.2761060000  | 59.2258170000 |
| C155 | 13.4407640000 | -8.6020140000  | 60.7842430000 |
| H156 | 12.9275530000 | -9.3991430000  | 60.2532850000 |
| H157 | 9.0037560000  | 0.7050730000   | 60.7752690000 |
| C158 | 8.1269800000  | 0.1560800000   | 60.4649990000 |
| H159 | 7.2836720000  | 0.4592420000   | 61.0677700000 |
| H160 | 10.0307710000 | -6.1244260000  | 55.8856500000 |
| H161 | 18.2592780000 | -9.4987530000  | 50.1505400000 |
| C162 | 17.5839750000 | -8.6559200000  | 50.1520260000 |
| H163 | 17.2773630000 | -8.4419890000  | 49.1387990000 |
| H164 | 23.2496410000 | -4.1335680000  | 52.3740710000 |
| H165 | 11.2553060000 | -5.7659110000  | 51.7855800000 |
| H166 | 15.2620870000 | -10.2751980000 | 56.9195160000 |
| H167 | 13.4559860000 | -6.2640050000  | 58.7677770000 |
| H168 | 11.6092530000 | -9.3243980000  | 57.3552270000 |
| H169 | 10.2240460000 | -6.5231470000  | 56.7021880000 |
| C170 | 7.0144180000  | -8.6588320000  | 56.2146480000 |
| H171 | 6.4055810000  | -7.7769020000  | 55.9895120000 |
| H172 | 7.5924400000  | -8.9025630000  | 55.3179790000 |
| H173 | 7.1493940000  | -5.8354100000  | 59.8218940000 |
| C174 | 6.9590150000  | -4.8009340000  | 59.5000030000 |
| H175 | 5.9039260000  | -4.4903550000  | 59.5181450000 |
| H176 | 7.5058450000  | -4.1511090000  | 60.1955970000 |
| C177 | 7.4683700000  | -4.5663220000  | 58.0758460000 |
| H178 | 8.5521280000  | -4.7352410000  | 58.0205270000 |
| H179 | 7.2908940000  | -3.5214290000  | 57.7949760000 |
| O180 | 6.7818400000  | -5.3587240000  | 57.1188960000 |
| H181 | 7.2219970000  | -6.2302040000  | 57.1563830000 |
| O182 | 11.8370210000 | -3.4326790000  | 55.4438300000 |
| H183 | 12.7272930000 | -3.8411380000  | 55.4606550000 |
| H184 | 11.2251990000 | -4.1571260000  | 55.1386660000 |

A structure obtained for  $N_2H_2$  after the addition of two protons to  $E_4$ . **Figure S1.**

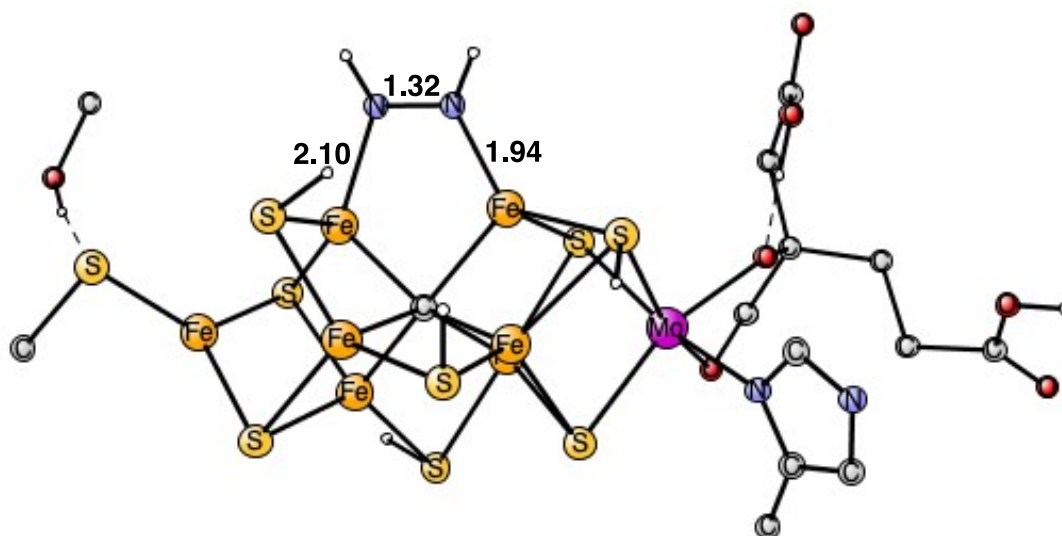

|     |                |                |                |
|-----|----------------|----------------|----------------|
| Mo1 | 16.9176041605  | -5.7874763238  | 53.6672310367  |
| Fe2 | 9.4823507382   | -7.5137492816  | 55.3683287822  |
| Fe3 | 11.8868105016  | -6.1045156819  | 56.3929799229  |
| Fe4 | 11.8383078709  | -7.3505634718  | 53.8654590789  |
| Fe5 | 12.5170268338  | -8.8734614724  | 55.9458908744  |
| Fe6 | 15.0007290471  | -7.8768716025  | 54.9412218354  |
| Fe7 | 14.6934829241  | -5.6775072587  | 56.2106417336  |
| Fe8 | 14.0649638652  | -5.9714633546  | 53.4431601619  |
| C9  | 17.9710141952  | -2.0882318056  | 54.4009070646  |
| H10 | 18.0972450945  | -1.0901840546  | 53.9763584737  |
| H11 | 16.9094312766  | -2.1957390470  | 54.6518964917  |
| C12 | 18.3617141192  | -3.1922844268  | 53.3737978163  |
| C13 | 19.7435536488  | -2.8620542103  | 52.7611855771  |
| H14 | 20.4702237274  | -2.8483736365  | 53.5805058639  |
| H15 | 19.7053026661  | -1.8561246443  | 52.3291872505  |
| C16 | 20.1940458617  | -3.8756148356  | 51.6905137099  |
| H17 | 19.7240391932  | -3.6705270069  | 50.7260772544  |
| H18 | 19.9020795562  | -4.8784701495  | 52.0174188644  |
| C19 | 17.3222528502  | -3.3296458450  | 52.2173755451  |
| O20 | 16.9571040953  | -4.5794411183  | 51.9788539719  |
| O21 | 16.9359096053  | -2.3629689034  | 51.5746540147  |
| O22 | 18.4257477961  | -4.4409100083  | 54.0481943065  |
| C23 | 13.2915584495  | -6.9632631981  | 55.1998755666  |
| S24 | 11.5504355114  | -8.1142504107  | 57.9966628443  |
| S25 | 16.9820746276  | -6.6692261384  | 56.1451934263  |
| S26 | 10.3674372669  | -5.4525934908  | 54.6729193014  |
| S28 | 14.6088234515  | -10.1623411523 | 55.7950924632  |
| S29 | 15.1319716896  | -4.1553782187  | 54.4381824096  |
| S30 | 10.6848859854  | -9.3357216254  | 54.3380287578  |
| S31 | 15.5917339246  | -7.6435804395  | 52.7142713761  |
| S32 | 12.4472949368  | -6.4424420786  | 51.6279814351  |
| H33 | 13.6351739257# | -2.1902107262# | 49.0425559257# |
| C34 | 13.2979244135# | -2.0241172940# | 50.0550238487# |
| H35 | 14.1152368477  | -2.3869059894  | 50.6833295575  |
| H36 | 13.1894257988  | -0.9455571697  | 50.2184447482  |
| N37 | 12.0526205258  | -2.7253025200  | 50.3635666910  |
| H38 | 11.3281891973  | -2.7039683508  | 49.6587792097  |
| C39 | 11.6650975775  | -3.0677141292  | 51.6063900607  |
| N40 | 12.5125506256  | -3.0597547357  | 52.6334586170  |
| H41 | 12.2049522746  | -3.4376306538  | 53.5257532644  |
| H42 | 13.5191254414  | -3.0091560508  | 52.5218055173  |
| N43 | 10.3844720564  | -3.4086458114  | 51.8455448146  |
| H44 | 9.7029190964   | -3.4322314436  | 51.1013237669  |
| H45 | 10.1448062219  | -3.8957834275  | 52.7156647039  |
| H46 | 7.9224825944   | 0.4139362600   | 59.4194456670  |
| C47 | 8.3639386266   | -1.3549867712  | 60.6311022591  |
| H48 | 8.3707008459   | -1.6047391716  | 61.6981161725  |
| H49 | 7.5302992553   | -1.9055707541  | 60.1802080797  |
| C50 | 9.6693931982   | -1.8145958751  | 60.0543534681  |
| N51 | 10.7984522406  | -1.9119360303  | 60.8476258282  |
| C52 | 9.9834904683   | -2.1422637814  | 58.7550983264  |
| H53 | 9.3893945572   | -2.2115427861  | 57.8584649754  |

|      |                |                 |                |
|------|----------------|-----------------|----------------|
| C54  | 11.7674840479  | -2.2952599143   | 60.0451806579  |
| H55  | 12.7950295948  | -2.4644326622   | 60.3321998037  |
| N56  | 11.3323183798  | -2.4357884599   | 58.7574856637  |
| H57  | 19.7837554661  | -4.3123790988   | 57.5489697293  |
| H58  | 16.7308579013  | -8.8849517356   | 50.7872532232  |
| C59  | 18.3418425537  | -7.3978901169   | 50.6323015103  |
| H60  | 17.6522614797  | -6.5565268577   | 50.7371333196  |
| H61  | 19.0484629751  | -7.1170914031   | 49.8400141711  |
| C62  | 19.1278352334  | -7.5459590759   | 51.9024877490  |
| N63  | 18.7196037625  | -7.0418339812   | 53.1333790979  |
| C64  | 20.3685406699  | -8.1100315650   | 52.0665879108  |
| H65  | 21.0324250093  | -8.5896708390   | 51.3643425594  |
| C66  | 19.6904573096  | -7.2855382176   | 54.0057808901  |
| H67  | 19.7140177564  | -6.9840999348   | 55.0442924502  |
| N68  | 20.6994093026  | -7.9437404553   | 53.3971102021  |
| H69  | 21.5602079685  | -8.2239454505   | 53.8445130809  |
| H70  | 6.9448816128   | -10.5658090664  | 56.9324860090  |
| C71  | 6.1750541094#  | -9.8249627505#  | 56.6900008205# |
| H72  | 5.5309556858#  | -10.2322284610# | 56.0424859929# |
| H73  | 5.6932321338#  | -9.5371414955#  | 57.6127203792# |
| S74  | 8.1540677054   | -7.9570792212   | 57.1283017647  |
| H75  | 11.8607669341  | -2.8159947539   | 57.9833627742  |
| H76  | 18.9051582722  | -4.0047034646   | 55.3837356203  |
| C78  | 18.7184455067  | -2.1297406925   | 55.7439579040  |
| O79  | 19.1513352848  | -3.3450460469   | 56.1346772065  |
| O80  | 18.8643489498  | -1.1513356224   | 56.4517079310  |
| C81  | 21.6877377716  | -3.8789549117   | 51.4953850708  |
| O82  | 22.2994590955  | -3.5968998472   | 50.4884793924  |
| O83  | 22.3208169173# | -4.2658019636#  | 52.6398595691# |
| H84  | 15.7024655537# | -0.1996319428#  | 61.4912314076# |
| C85  | 14.8549940144# | -0.0829907695#  | 60.8320019600# |
| H86  | 13.9165015894# | -0.2867338794#  | 61.3260937710# |
| H87  | 14.8369221399  | 0.9916744291    | 60.5959792888  |
| C88  | 15.0599852385# | -0.8751945005#  | 59.5441990538# |
| H89  | 14.4371641721  | -0.4418026628   | 58.7518574364  |
| H90  | 14.7067201775  | -1.9029217857   | 59.6833906570  |
| C91  | 16.5057558047  | -0.9950195745   | 59.0570998317  |
| H92  | 17.1193921977  | -0.1448569526   | 59.3801863235  |
| H93  | 16.5504290117  | -0.9847544204   | 57.9598844385  |
| C94  | 17.1855526159  | -2.2987862013   | 59.5003199003  |
| O95  | 16.5652317825  | -3.2716240182   | 59.9450398093  |
| N96  | 18.5378371339  | -2.2891730181   | 59.3570567780  |
| H97  | 19.0146607283  | -3.1797664218   | 59.4460971598  |
| H98  | 18.9345733695  | -1.6515561477   | 58.6715158936  |
| C99  | 10.6519926558# | 0.0100029163#   | 53.3460014191# |
| H100 | 11.1636988483# | 0.9592721366#   | 53.2872698914# |
| H101 | 9.5863320681#  | 0.1850134636#   | 53.3579372874# |
| H102 | 10.9290809673  | -0.5990467748   | 52.4815290346  |
| C103 | 11.0481701055  | -0.6136335058   | 54.7019628234  |
| H104 | 10.7361906231  | -1.6693337582   | 54.7182156521  |
| C105 | 10.2993910987  | 0.1153037438    | 55.8282585531  |
| H106 | 9.2138837018   | -0.0053137014   | 55.7287961235  |
| H107 | 10.5183080800  | 1.1911596454    | 55.8015776138  |
| H108 | 10.5888109727  | -0.2560085713   | 56.8160555140  |
| C109 | 12.5627891575  | -0.5391748137   | 54.9416574909  |
| H110 | 13.1369346746  | -1.0063376281   | 54.1347766656  |
| H111 | 12.8434472095  | -1.0332685455   | 55.8796182342  |
| H112 | 12.8859262579  | 0.5075783408    | 55.0140868241  |
| H113 | 13.4550781812# | -12.2303883282# | 53.1883142378# |
| C114 | 13.9110013448# | -11.6210557261# | 52.4219864800# |
| H115 | 14.7723964250  | -11.0844035839  | 52.8302864660  |
| H116 | 14.1995160122  | -12.2245571557  | 51.5584387198  |
| N117 | 12.8017574377  | -10.7214262973  | 52.0736332188  |
| H118 | 12.0695809794  | -10.6003406983  | 52.7812150975  |
| C119 | 12.6981411497  | -9.9255999188   | 51.0205514875  |
| N120 | 13.7727894252  | -9.6696674475   | 50.2423920720  |
| H121 | 13.6231906269  | -9.0435487800   | 49.4607686952  |
| H122 | 14.6511804707  | -9.5096354072   | 50.7296317660  |
| N123 | 11.4885974812  | -9.4223307956   | 50.6785170514  |
| H124 | 10.7398287899  | -9.6279124731   | 51.3369439411  |
| H125 | 11.5097195143  | -8.4310315256   | 50.4353305499  |
| H126 | 19.1676919278  | -8.2082072024   | 61.7394739137  |
| C127 | 19.5978933219# | -7.2298793240#  | 61.9900502646# |
| H128 | 20.6425193096  | -7.3768710423   | 62.2810733842  |
| C129 | 18.8599825388  | -6.5604860810   | 63.1548453578  |

|      |                |                |                |
|------|----------------|----------------|----------------|
| O130 | 19.4029460402  | -5.7544521230  | 63.9009197768  |
| C131 | 19.4918716987# | -6.2717983300# | 60.7990633131# |
| H132 | 19.8844162976  | -5.2922346658  | 61.0880504133  |
| H133 | 18.4401333023  | -6.1250765326  | 60.5320308600  |
| C134 | 20.2691171028  | -6.8159469575  | 59.5811778655  |
| H135 | 20.0051508382  | -7.8604045321  | 59.3848054278  |
| H136 | 21.3459985902  | -6.8080679367  | 59.8047537878  |
| C137 | 20.0844211734  | -6.0804720611  | 58.2657327744  |
| O138 | 20.0687614958  | -6.6327076115  | 57.1779620044  |
| O139 | 19.9613687174  | -4.7548690234  | 58.4180068233  |
| N140 | 17.5230575140  | -6.8507393512  | 63.1960054832  |
| H141 | 17.1657872435  | -7.4875258535  | 62.4964039205  |
| C142 | 16.5368855693# | -6.0058844961# | 63.8530414165# |
| H143 | 16.0051362265  | -6.5838193594  | 64.6207290868  |
| H144 | 17.0865857108  | -5.2081442071  | 64.3580937051  |
| C145 | 15.5129647222  | -5.4263594835  | 62.8427750620  |
| H146 | 15.9977328541  | -4.6688349790  | 62.2173947698  |
| H147 | 14.7181167522  | -4.9278836450  | 63.4117696259  |
| C148 | 14.9441298238  | -6.5280246258  | 61.9728572343  |
| C149 | 14.0176880142  | -7.4521123449  | 62.4844581331  |
| H150 | 13.5990381537  | -7.2961259417  | 63.4761664113  |
| C151 | 15.4539696336  | -6.7403506060  | 60.6808271107  |
| H152 | 16.1462574594  | -6.0128718575  | 60.2626187064  |
| C153 | 13.6460691013  | -8.5779460605  | 61.7488518006  |
| H154 | 12.9312372920  | -9.2836875305  | 62.1622274010  |
| C155 | 15.0913380228  | -7.8739860937  | 59.9447145974  |
| H156 | 15.5099206540  | -8.0225290065  | 58.9521888283  |
| C157 | 14.1998296761  | -8.8052416737  | 60.4849800529  |
| H158 | 13.9213146952  | -9.6933338021  | 59.9244474000  |
| H159 | 9.0037558258#  | 0.7050735039#  | 60.7752696591# |
| C160 | 8.1269811285#  | 0.1560800652#  | 60.4649980735# |
| H161 | 7.2836721061#  | 0.4592414291#  | 61.0677704412# |
| H269 | 18.2592785277# | -9.4987525755# | 50.1505400643# |
| C270 | 17.5839746791# | -8.6559202921# | 50.1520273120# |
| H271 | 17.2773626284# | -8.4419892610# | 49.1387987550# |
| H273 | 23.2756757042  | -4.2143583827  | 52.4448393606  |
| H274 | 11.3952390547  | -5.6097610294  | 51.7356746097  |
| H275 | 14.8934854779  | -9.9497389984  | 57.0997649719  |
| H277 | 12.3814567686  | -4.9616667738  | 59.0042794505  |
| C280 | 6.8082618439   | -8.6078768455  | 56.0374765727  |
| H281 | 6.0634188173   | -7.8212072257  | 55.8735734026  |
| H282 | 7.2110485346   | -8.8888963430  | 55.0555510857  |
| N283 | 12.7007002866  | -5.0740606451  | 58.0374029201  |
| N284 | 14.0104974667  | -5.0022767380  | 57.8936067832  |
| H285 | 14.5305603934  | -4.7486023468  | 58.7421302348  |
| H286 | 7.1493941229#  | -5.8354098843# | 59.8218942996# |
| C287 | 6.9590149674#  | -4.8009334419# | 59.5000033650# |
| H288 | 5.9039259930#  | -4.4903550308# | 59.5181451079# |
| H289 | 7.4891635205   | -4.1661907475  | 60.2234641710  |
| C290 | 7.4860647585   | -4.4882159023  | 58.0968837309  |
| H291 | 8.5514413674   | -4.7515651083  | 58.0146612978  |
| H292 | 7.4060808440   | -3.4074683403  | 57.9267067001  |
| O293 | 6.7370948809   | -5.1020429439  | 57.0599059470  |
| H294 | 7.0942796351   | -6.0101694606  | 56.9944743088  |
| H295 | 12.7150252965  | -7.9121981665  | 58.6548967761  |
| H296 | 17.2149711819  | -8.0073643236  | 56.1141088104  |
